# Supplementary material
Source: HighWire-hosted journal article supplement (doi:10.1101/rna.079897.123)
Supplement: Supplemental_FigureS2.pdf [file Supplemental_FigureS2.pdf]

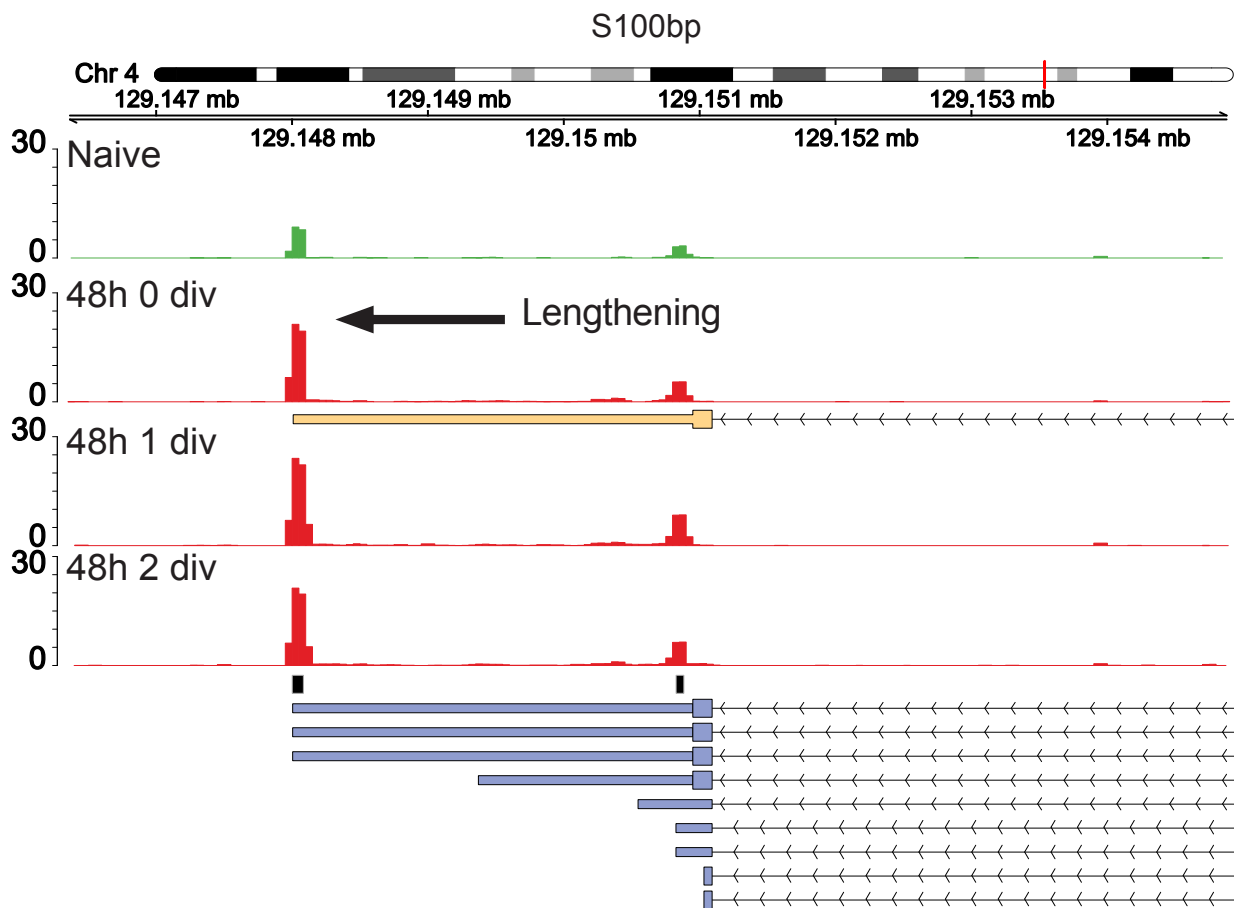

**Supplemental Figure 2.** Example of S100bp transcript which is lengthened upon activation. Arrow indicates event direction. Yellow boxes represent isoform identified using PacBio long read sequencing, blue boxes represent Gencode (v25) isoforms and black boxes indicate PAS.
