# Supplementary material
Source: HighWire-hosted journal article supplement (doi:10.1101/rna.079897.123)
Supplement: Supplemental_FigureS3.pdf [file Supplemental_FigureS3.pdf]

**A**

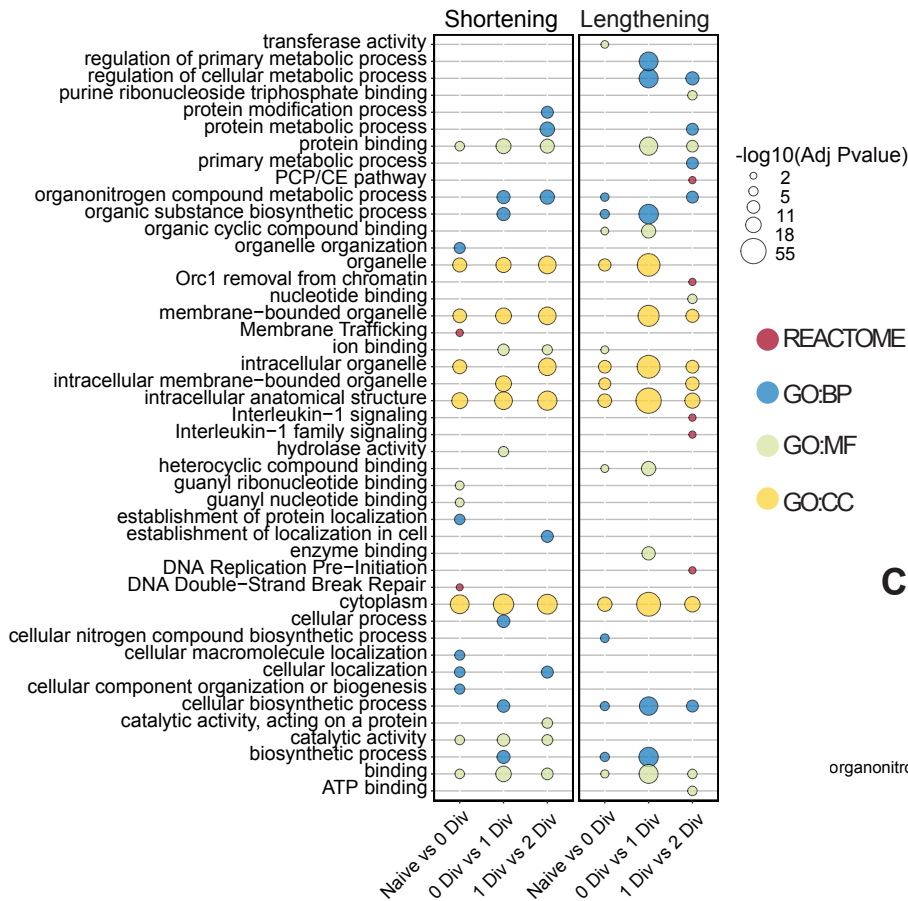

**B**

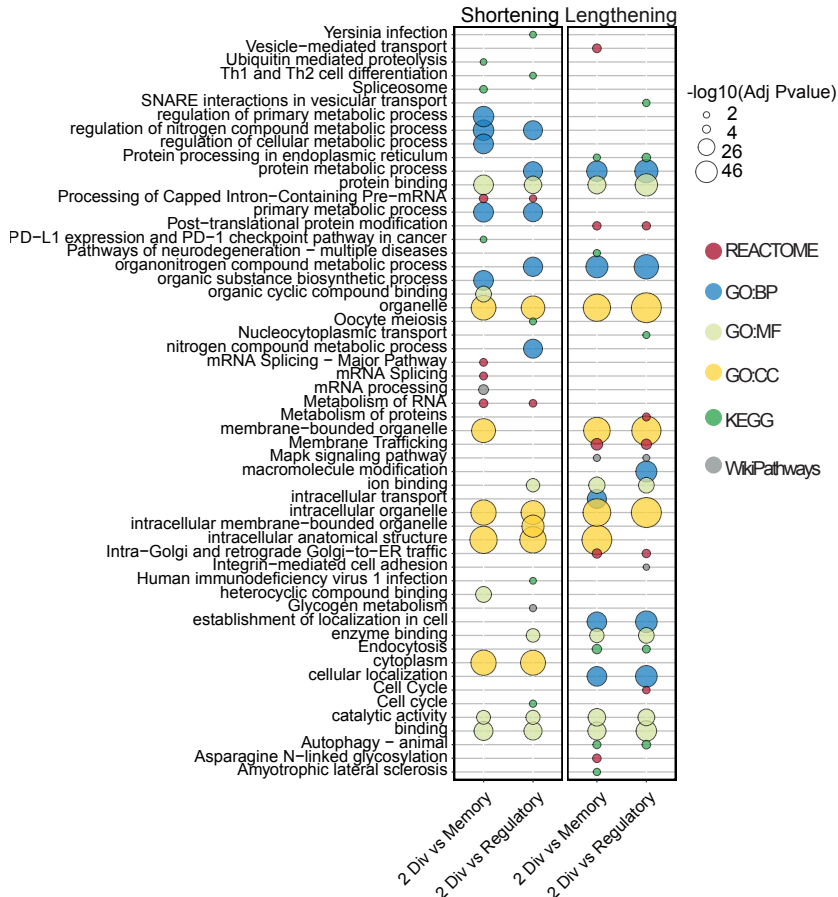

**C**

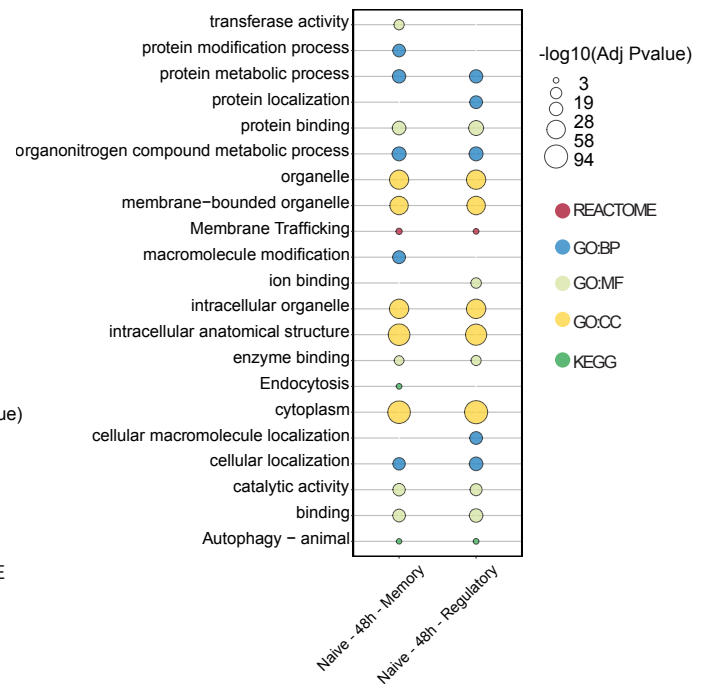

**Supplemental Figure 3.** Comprehensive representation of functional annotations of genes associated with an APA event. Dot colors indicate source types. Dot size represents  $-\log_{10}(\text{adjusted Pvalues})$ . A) Comparisons between Naive and activated samples separated by cell divisions status. B) Comparisons between activated 2 Divisions samples and memory/regulatory samples. C) Annotation of genes associated with reverted APA.
