# Supplementary material
Source: HighWire-hosted journal article supplement (doi:10.1101/rna.079897.123)
Supplement: Supplemental_FigureS4.pdf [file Supplemental_FigureS4.pdf]

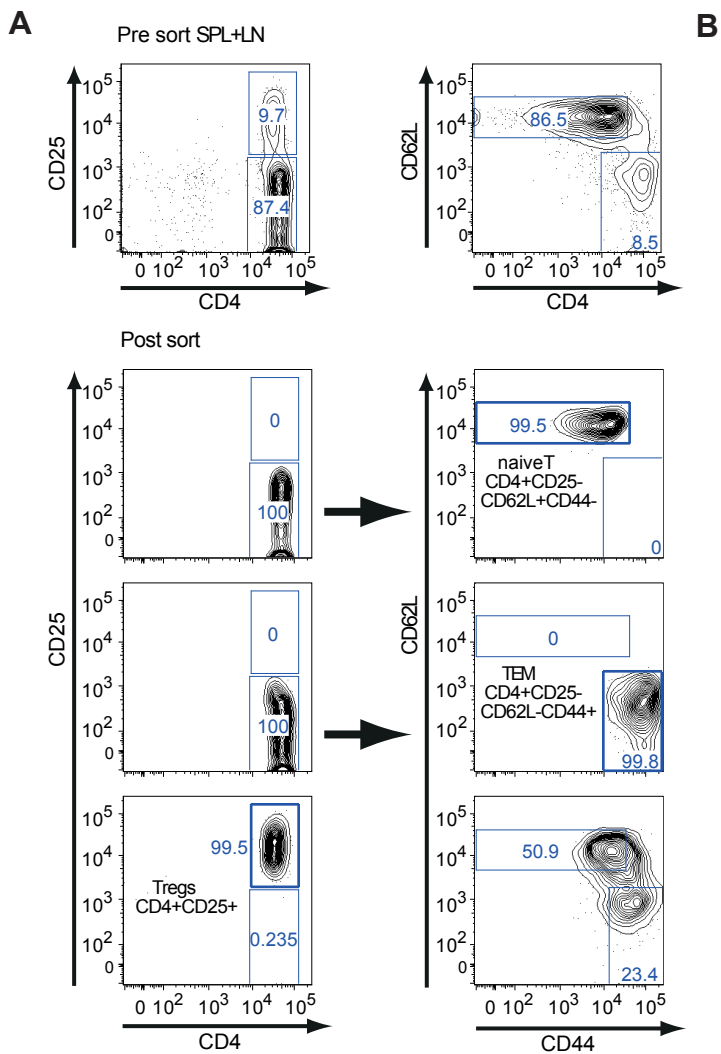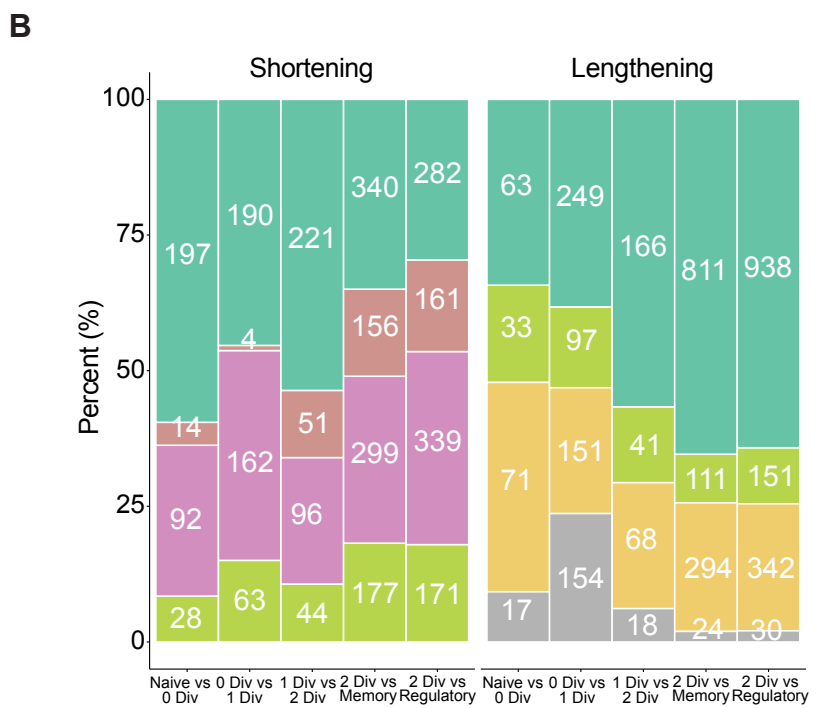

3'UTR-3'UTR 3'UTR-Intron Intron-3'UTR  
 3'UTR-Exon Exon-3'UTR Other

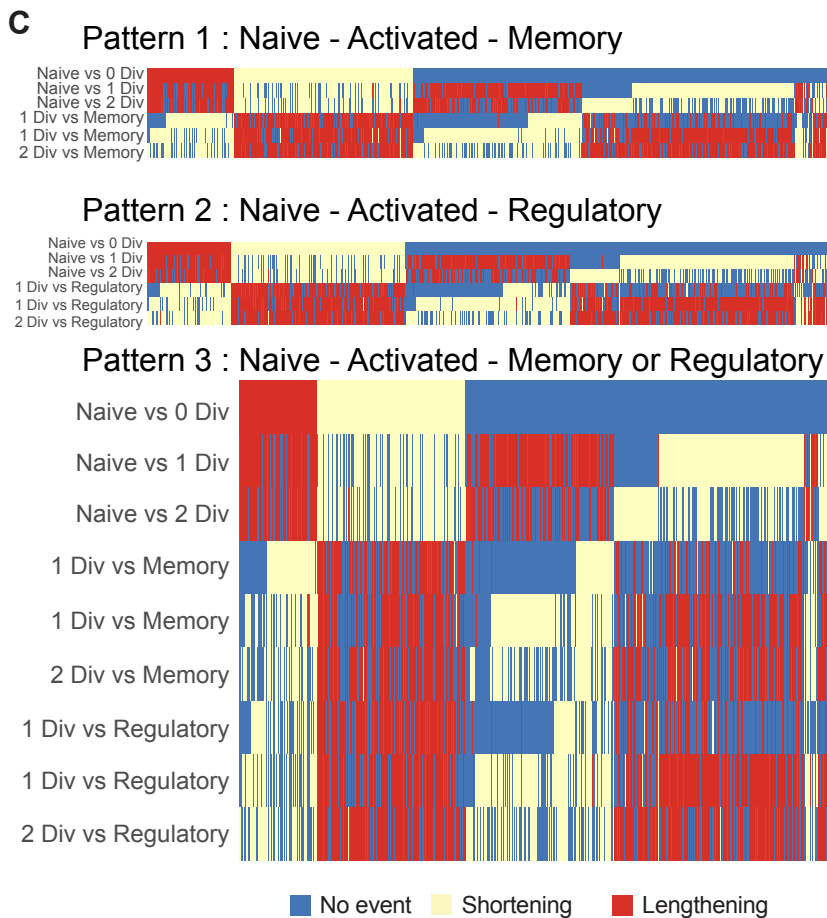

**Supplemental Figure 4** related to figure 3. A) Representative immune-phenotyping of CD4<sup>+</sup>T cells for activation markers CD44, CD62L, CD69, CD25 after 48 hours of in vitro stimulation. B) Classification of APA events per type of transition. C) Overview of all genes having a reverted pattern, e.g. being shortened/lengthened between naive and one of the 48h activated populations, and then being lengthened/shortened in either memory or regulatory
