# Supplementary material
Source: HighWire-hosted journal article supplement (doi:10.1101/rna.079897.123)
Supplement: Supplemental_FigureS6.pdf [file Supplemental_FigureS6.pdf]

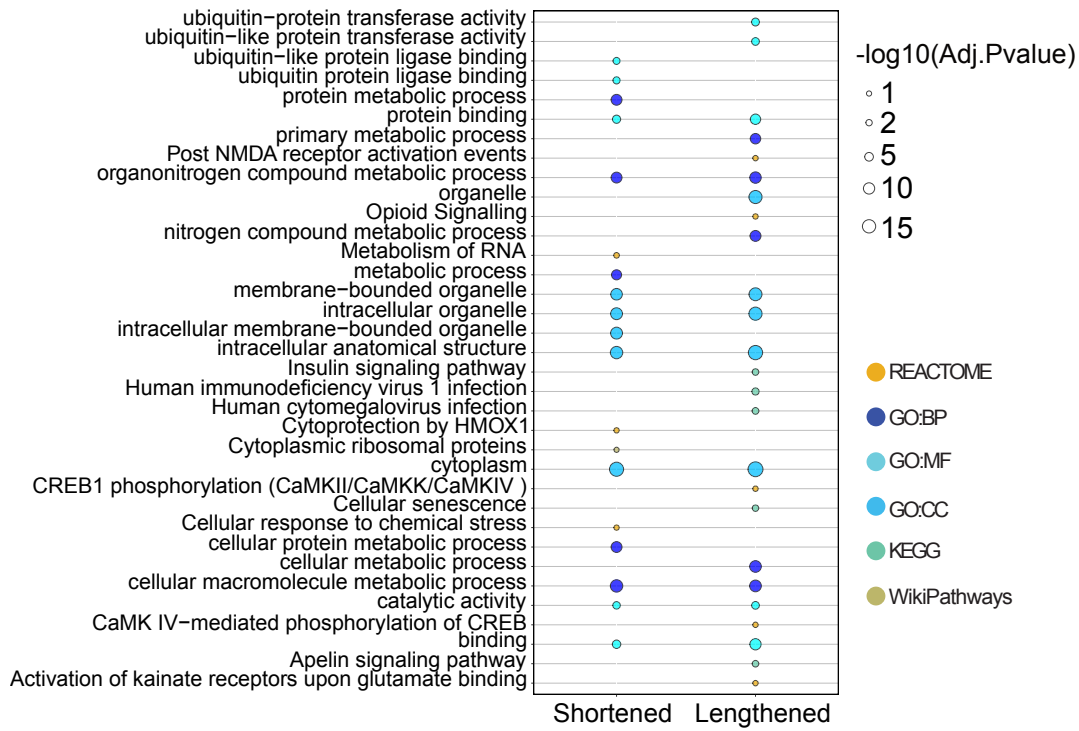

**Supplemental Figure 6.** Functional annotations of genes associated with an APA event when comparing naive and pooled 48h activated samples.
