# Supplementary material
Source: HighWire-hosted journal article supplement (doi:10.1101/rna.079897.123)
Supplement: Supplemental_TableS1.pdf [file Supplemental_TableS1.pdf]

|                                                           |                               | <b>Naive</b>    | <b>0 division</b> | <b>2 divisions</b> |
|-----------------------------------------------------------|-------------------------------|-----------------|-------------------|--------------------|
| Unique                                                    | Isoforms                      | <b>10,527</b>   | <b>12,602</b>     | <b>11,109</b>      |
|                                                           | Genes                         | <b>5,644</b>    | <b>5,902</b>      | <b>5,499</b>       |
| Gene classification                                       | Annotated                     | 4,751           | 5,582             | 5,162              |
|                                                           | Novel                         | 893             | 320               | 337                |
| Characterization of transcripts based on splice junctions | FSM (Full Splice Match)       | 5,552           | 7,324             | 6,550              |
|                                                           | ISM (Incomplete Splice Match) | 1,112           | 1,978             | 1,878              |
|                                                           | NIC (Novel In Catalog)        | 1,824           | 1,761             | 1,407              |
|                                                           | NNC (Novel Not in Catalog)    | 921             | 1,047             | 793                |
|                                                           | Genic / Genomic               | 98              | 73                | 55                 |
|                                                           | Antisense                     | 343             | 156               | 156                |
|                                                           | Fusion                        | 15              | 8                 | 6                  |
|                                                           | Intergenic                    | 662             | 253               | 264                |
|                                                           | Genic Intron                  | 0               | 2                 | 0                  |
| Splice junction classification                            | Known canonical               | 44,857 (97.47%) | 53,239 (97.6%)    | 48,206 (98.05%)    |
|                                                           | Known non-canonical           | 37 (0.08%)      | 29 (0.05%)        | 32 (0.07%)         |
|                                                           | Novel canonical               | 879 (1.91%)     | 1,020 (1.87%)     | 709 (1.44%)        |
|                                                           | Novel non-canonical           | 247 (0.54%)     | 261 (0.48%)       | 217 (0.44%)        |

Table S1. Summary of Pacbio long read sequencing analysis.
