# Supplementary material
Source: HighWire-hosted journal article supplement (doi:10.1101/rna.079897.123)
Supplement: Supplemental_TableS2.xlsx [file Supplemental_TableS2.xlsx]

## Sheet: Sheet1
Naive_48h_memory	Naive_48h_regulatory	Naive_48h_memory_regulatory
Dgkh	Dgkh	Dgkh
Sntb1	Sntb1	Sntb1
Pag1	Pag1	Pag1
Cep85	Cep85	Cep85
Ndrg3	Ndrg3	Ndrg3
Zfp949	Zfp949	Zfp949
Vps33a	Vps33a	Vps33a
Zdhhc20	Zdhhc20	Zdhhc20
Polb	Polb	Polb
Fech	Fech	Fech
Tnrc6b	Tnrc6b	Tnrc6b
Trappc6b	Trappc6b	Trappc6b
Dnajc18	Dnajc18	Dnajc18
Qser1	Qser1	Qser1
Rad51d	Rad51d	Rad51d
Shmt1	Shmt1	Shmt1
Rai1	Rai1	Rai1
1700096K18Rik	1700096K18Rik	1700096K18Rik
Trim56	Trim56	Trim56
Fnbp1	Fnbp1	Fnbp1
Fbxo42	Fbxo42	Fbxo42
Copg2	Copg2	Copg2
Tut4	Tut4	Tut4
Mettl5	Mettl5	Mettl5
Sqstm1	Sqstm1	Sqstm1
Pola2	Pola2	Pola2
Lsm12	Lsm12	Lsm12
Arl15	Uty	Uty
Xrn2	Arl15	Arl15
Acadm	Xrn2	Xrn2
Alg14	Acadm	Acadm
Desi2	Desi2	Alg14
Kpna6	Kpna6	Desi2
Pfdn1	Pfdn1	Kpna6
Pex13	Pex13	Pfdn1
Rab14	Srsf5	Pex13
Srsf5	Sf3b2	Rab14
Sf3b2	Rnf6	Srsf5
Rnf6	Bola1	Sf3b2
Ktn1	Ktn1	Rnf6
Ppp3r1	Ppp3r1	Bola1
Srp72	Srp72	Ktn1
Lig1	Lig1	Ppp3r1
2310033P09Rik	2310033P09Rik	Srp72
Tnfaip8	Tnfaip8	Lig1
Swt1	Swt1	2310033P09Rik
Rab35	Arhgap21	Tnfaip8
Rbm17	Rassf3	Swt1
Xpnpep1	Rbm17	Arhgap21
Ireb2	Cbx7	Rab35
Srsf6	Xpnpep1	Rassf3
Msra	Ireb2	Rbm17
Rcan3	Btg1	Cbx7
Mvb12b	Pcyt2	Xpnpep1
A730063M14Rik	Srsf6	Ireb2
Zfp395	Msra	Btg1
Myl6b	Mttp	Pcyt2
Pcbp2	A730063M14Rik	Srsf6
Izumo1r	Aoc2	Msra
Scarb2	Myl6b	Rcan3
Chmp2b	Pcbp2	Mttp
Colgalt1	Ap3m2	Mvb12b
Rgcc	Izumo1r	A730063M14Rik
Sass6	Scarb2	Zfp395
Rbm39	Chmp2b	Aoc2
Zfp119a	Colgalt1	Myl6b
Tmem164	Rgcc	Pcbp2
Wars	Sass6	Ap3m2
Gpam	Tmem164	Izumo1r
Usp37	Wars	Scarb2
Helz	Gpam	Chmp2b
Prxl2c	Usp37	Colgalt1
Coa7	Ext1	Rgcc
Zfp41	Dclre1b	Sass6
Ppp1r3f	Helz	Rbm39
Ralgapb	Prxl2c	Zfp119a
Cnih4	Spef2	Tmem164
Tbl2	Smyd3	Wars
Ppm1b	Ppp1r3f	Gpam
Ecd	Utp25	Usp37
Cops8	Ralgapb	Ext1
Rnf220	Scai	Dclre1b
Pced1b	Cnih4	Helz
Vti1a	Tbl2	Prxl2c
Mfsd1	Ppm1b	Coa7
Ankle2	Ecd	Spef2
Tab1	Cops8	Zfp41
Tnfrsf22	Rnf220	Smyd3
Xpo6	Pced1b	Ppp1r3f
Pgd	Vti1a	Utp25
Srsf1	Mfsd1	Ralgapb
Zdhhc15	Ankle2	Scai
Fbxl20	Myo6	Cnih4
Egr3	Rnf114	Tbl2
Ccar2	Tab1	Ppm1b
Eloa	Tnfrsf22	Ecd
Sin3a	Xpo6	Cops8
Celsr1	Pgd	Rnf220
Tm9sf2	Srsf1	Pced1b
Mrps23	Zdhhc15	Vti1a
Foxp4	Nxn	Mfsd1
Prkag1	Fbxl20	Ankle2
Fbxl17	Egr3	Myo6
Zbtb46	Ccar2	Rnf114
Tra2a	Vma21	Tab1
H1f0	Eloa	Tnfrsf22
Snx27	Clptm1	Xpo6
Ipo9	Celsr1	Pgd
Iffo1	Sla2	Srsf1
Ncoa2	Tm9sf2	Zdhhc15
Ifi206	Mrps23	Nxn
Mmachc	Foxp4	Fbxl20
Mettl4	Prkag1	Egr3
Cdk11b	Morf4l1	Ccar2
Atg16l2	Trabd	Vma21
Gart	Fbxl17	Eloa
Wwp2	Rtel1	Clptm1
Lin52	Zbtb46	Sin3a
Zfp950	Cnbp	Celsr1
Ap4s1	Tra2a	Sla2
Ssr1	Snx27	Tm9sf2
Fgf13	Ipo9	Mrps23
Atf6	Iffo1	Foxp4
Afg3l2	Ncoa2	Prkag1
5730455P16Rik	Ifi206	Morf4l1
Brwd1	Mmachc	Trabd
Rnf4	Mettl4	Fbxl17
Polr2b	Cdk11b	Rtel1
Uap1	Ran	Zbtb46
Cd5	Atg16l2	Cnbp
Afg1l	Gart	Tra2a
Rab11b	Wwp2	H1f0
Zfp943	Zfp950	Snx27
Bcl6	Ap4s1	Ipo9
Hgs	Ssr1	Iffo1
Uvrag	Fgf13	Ncoa2
Tbc1d5	0610030E20Rik	Ifi206
Glo1	Atf6	Mmachc
Fip1l1	Afg3l2	Mettl4
Api5	5730455P16Rik	Cdk11b
Ago2	Brwd1	Ran
Urod	Rnf4	Atg16l2
Abcf3	Polr2b	Gart
Tgfbrap1	Cd5	Wwp2
Cox8a	Afg1l	Lin52
Nrxn1	Rab11b	Zfp950
Prkcz	Zfp943	Ap4s1
Capza1	Bcl6	Ssr1
Pogk	Hgs	Fgf13
Ncbp2	Uvrag	0610030E20Rik
Lnpep	Tbc1d5	Atf6
Map3k3	Glo1	Afg3l2
Chka	Fip1l1	5730455P16Rik
Kremen1	Api5	Brwd1
Klhdc10	Znrf1	Rnf4
Klc2	Ago2	Polr2b
Psmf1	Stip1	Uap1
Fubp3	Urod	Cd5
Wdr37	Abcf3	Afg1l
Cox15	Tgfbrap1	Rab11b
Spr	Nrxn1	Zfp943
Smg7	Prkcz	Bcl6
Tmem179b	Capza1	Hgs
Kif11	Pogk	Uvrag
Mindy3	Hint3	Tbc1d5
Asap1	Ncbp2	Glo1
Tmem80	Lnpep	Fip1l1
Cyth1	Chka	Api5
Slc18a2	Kremen1	Znrf1
Usp36	Klhdc10	Ago2
Actr1a	Klc2	Stip1
Spred2	Psmf1	Urod
Timp2	Wdr37	Abcf3
Mxd1	Utp15	Tgfbrap1
Vipr1	Sergef	Cox8a
Zfp809	Spr	Nrxn1
Rfk	Smg7	Prkcz
Mgat5	Ccdc137	Capza1
Abhd5	Rrm2	Pogk
Rapgef1	Atox1	Hint3
Elk4	Kif11	Ncbp2
Snap29	Mindy3	Lnpep
Nedd9	Xpot	Map3k3
Usp12	Asap1	Chka
Auh	Zfp287	Kremen1
Cacul1	Tmem80	Klhdc10
Ptpn12	Kdsr	Klc2
Mbp	Cyth1	Psmf1
Pde7a	Slc18a2	Fubp3
Ttc39b	Actr1a	Wdr37
Hs3st3b1	Spred2	Cox15
Lsg1	Timp2	Utp15
Ust	Mxd1	Sergef
Nanos1	Vipr1	Spr
Spg11	Zfp809	Smg7
Arhgef2	Rfk	Tmem179b
Ywhaq	Slc49a4	Ccdc137
Pyurf	Tfdp1	Rrm2
Hnrnph3	Mgat5	Atox1
Ciao1	Slc25a33	Kif11
Kdm1b	Stn1	Mindy3
Tmem127	Abhd5	Xpot
Socs1	Parp14	Asap1
Lyrm7	Rapgef1	Zfp287
Cand2	Elk4	Tmem80
Timm44	Sbf2	Kdsr
Bcdin3d	Snap29	Cyth1
Scfd2	Rsph3a	Slc18a2
Xrcc4	Nedd9	Usp36
Prmt6	Usp12	Actr1a
Itgal	Auh	Spred2
Tent4a	Cacul1	Timp2
Nup88	Ptpn12	Mxd1
Pafah1b1	Mbp	Vipr1
Ppwd1	Pde7a	Zfp809
Cers5	Ttc39b	Rfk
St3gal4	Lrpap1	Slc49a4
Vamp1	Lsg1	Tfdp1
L2hgdh	Ust	Mgat5
Pycard	Nanos1	Slc25a33
Mob3b	Sema4b	Stn1
Dync2h1	Spg11	Abhd5
Zcchc10	Arhgef2	Parp14
Cdk12	Ywhaq	Rapgef1
Cnot4	Pyurf	Elk4
Snhg6	Ciao1	Sbf2
Zfp120	Kdm1b	Snap29
Map4k5	Tmem127	Rsph3a
Pik3c2a	Zfp446	Nedd9
Hdhd2	Ifit3b	Usp12
Dnajb9	Socs1	Auh
Wdr12	Lyrm7	Cacul1
Ccny	Csnk2a2	Ptpn12
Rab3d	Dapk1	Mbp
Ankrd28	Cand2	Pde7a
Tollip	Timm44	Ttc39b
Tada2a	Bcdin3d	Hs3st3b1
Kif16b	Scfd2	Lrpap1
Gga3	Xrcc4	Lsg1
Smap1	Pik3cb	Ust
Snrpa	Prmt6	Nanos1
Shq1	Itgal	Sema4b
Ubash3a	Tent4a	Spg11
Ndufaf6	Tlcd1	Arhgef2
Tmed7	Nup88	Ywhaq
Hipk3	Pafah1b1	Pyurf
Thoc5	Ppwd1	Hnrnph3
Ppp2r5c	Cers5	Ciao1
Stard3nl	St3gal4	Kdm1b
Pfkfb3	Vamp1	Tmem127
Rbm18	L2hgdh	Zfp446
Wdr74	Pycard	Ifit3b
Mau2	Mob3b	Socs1
Ctns	Dync2h1	Lyrm7
Ndufs7	Zcchc10	Csnk2a2
Zfp467	Cdk12	Dapk1
Ndufa9	Cnot4	Cand2
Yipf5	Zfp120	Timm44
M6pr	Map4k5	Bcdin3d
Tnfaip3	Pik3c2a	Scfd2
Eif2ak3	Hdhd2	Xrcc4
Fbxo4	Dnajb9	Pik3cb
Cdk16	Wdr12	Prmt6
Tex261	Ccny	Itgal
Wdr82	Rab3d	Tent4a
Slc28a2	Ankrd28	Tlcd1
Brap	Tollip	Nup88
Kdm6b	Tada2a	Pafah1b1
E230001N04Rik	Thg1l	Ppwd1
Rcbtb1	Gga3	Cers5
Cdca4	Snrpa	St3gal4
Psme3	Aebp2	Vamp1
Cct4	Rybp	L2hgdh
Atxn2	Shq1	Pycard
Agap2	Ubash3a	Mob3b
Acsl4	Ndufaf6	Dync2h1
Arl4c	Tmed7	Zcchc10
Ubl3	Hipk3	Cdk12
Mgat4a	Thoc5	Cnot4
Gnai3	Ppp2r5c	Snhg6
Abcc4	Stard3nl	Zfp120
Ubr2	Pfkfb3	Map4k5
Mto1	Rbm18	Pik3c2a
Rcbtb2	Wdr74	Hdhd2
Zc3h7b	Mau2	Dnajb9
Prkaca	Ctns	Wdr12
Chd9	Ndufs7	Ccny
Rbbp7	Zfp467	Rab3d
Gmeb2	Trmt10b	Ankrd28
Fbxl3	Ndufa9	Tollip
Yipf6	Yipf5	Tada2a
Gsr	M6pr	Thg1l
Zfp64	Slc5a6	Kif16b
Smim7	Gna11	Gga3
Zfp942	Tnfaip3	Smap1
Dnttip1	Eif2ak3	Snrpa
Irgm2	Fbxo4	Aebp2
Sumo3	Cdk16	Rybp
Glul	Tex261	Shq1
Slc11a2	Ppp1r12b	Ubash3a
Rubcn	Slc28a2	Ndufaf6
Ppil3	Brap	Tmed7
Cers4	Sting1	Hipk3
Entpd7	Kdm6b	Thoc5
Uck2	Rcbtb1	Ppp2r5c
Smyd1	Cdca4	Stard3nl
Hsdl2	Faf2	Pfkfb3
Cmtm4	Psme3	Rbm18
Sdf2l1	Cct4	Wdr74
Sec22c	Ly6c1	Mau2
Yme1l1	Atxn2	Ctns
Ykt6	Acsl4	Ndufs7
Ddx19b	Mapkbp1	Zfp467
Slc9a9	Arl4c	Trmt10b
Map4k2	Adgre5	Ndufa9
Slc25a5	Mgat4a	Yipf5
Rprd2	Gnai3	M6pr
Setd3	Acad8	Slc5a6
Slc44a2	Ccdc71	Gna11
Atg7	Abcc4	Tnfaip3
Vps54	Ubr2	Eif2ak3
Abhd10	Rcbtb2	Fbxo4
1110032F04Rik	Zc3h7b	Cdk16
Prdx6	Chd9	Tex261
Carf	Rbbp7	Wdr82
Invs	Fbxl3	Ppp1r12b
Relch	Yipf6	Slc28a2
Ahcyl2	Mcur1	Brap
Cd101	Gsr	Sting1
Ldlrad3	Ccdc186	Kdm6b
Igf2r	Zfp64	E230001N04Rik
Zcchc9	Smim7	Rcbtb1
Bbip1	Zfp942	Cdca4
Bptf	Dnttip1	Faf2
Psma4	Sumo3	Psme3
Gzf1	Glul	Cct4
Lypla1	Slc11a2	Ly6c1
2700049A03Rik	Rubcn	Atxn2
Mpnd	Ppil3	Agap2
Zranb2	Cers4	Acsl4
Il21r	Entpd7	Mapkbp1
Qtrt2	Uck2	Arl4c
Washc4	Smyd1	Adgre5
Dennd4a	Rnaseh2a	Ubl3
Slamf1	Hsdl2	Mgat4a
Fbxo28	Cmtm4	Gnai3
Dock9	Sdf2l1	Acad8
Bora	Yme1l1	Ccdc71
Prdx1	Ykt6	Abcc4
Oxa1l	Ddx19b	Ubr2
Dusp5	Pon2	Mto1
Acad10	Arhgap1	Rcbtb2
Man2b1	Slc9a9	Zc3h7b
Eif2b3	Kif22	Prkaca
Plbd2	Slc25a5	Chd9
Magt1	Rprd2	Rbbp7
Naa20	Slc44a2	Gmeb2
Cdc37l1	Atg7	Fbxl3
Plcxd2	Vps54	Yipf6
Esf1	Whrn	Mcur1
Pds5b	1110032F04Rik	Gsr
Anapc7	Prdx6	Ccdc186
D6Wsu163e	Kdm5d	Zfp64
Prorsd1	Carf	Smim7
Ufl1	Relch	Zfp942
Ide	Ahcyl2	Dnttip1
Trp53i13	Parl	Irgm2
Etaa1	Eef2k	Sumo3
Mmgt2	Cd101	Glul
Rif1	Ldlrad3	Slc11a2
Rdh14	Igf2r	Rubcn
Katnbl1	Zcchc9	Ppil3
Atg3	Psma4	Cers4
Zfp955b	Lypla1	Entpd7
Aktip	2700049A03Rik	Uck2
Zbtb1	Mpnd	Smyd1
Cep57	Zranb2	Rnaseh2a
4930469K13Rik	Il21r	Hsdl2
Usp47	Qtrt2	Cmtm4
Ube2b	Washc4	Sdf2l1
Snapc3	Dennd4a	Sec22c
Ube2k	Slamf1	Yme1l1
Smc6	Fbxo28	Ykt6
Ccdc85c	Dock9	Ddx19b
Pigt	Bora	Pon2
Carnmt1	Prdx1	Arhgap1
Slc4a1ap	Oxa1l	Slc9a9
Cldnd1	Dusp5	Kif22
Tcerg1	Man2b1	Map4k2
Mbtd1	Eif2b3	Slc25a5
Zbtb5	Plbd2	Rprd2
Rbmxl1	Magt1	Setd3
Pcf11	Naa20	Slc44a2
Btg2	Cdc37l1	Atg7
Prr3	Esf1	Vps54
Abcb1a	Anapc7	Abhd10
Ints8	D6Wsu163e	Whrn
Etv6	Prorsd1	1110032F04Rik
Med29	Ufl1	Prdx6
Akap9	Ide	Kdm5d
Nek4	Rif1	Carf
Wdr33	Atg3	Invs
Lbhd1	Zfp955b	Relch
Herpud1	Aktip	Ahcyl2
9330175E14Rik	Cep57	Parl
Tradd	4930469K13Rik	Eef2k
Ep300	Usp47	Cd101
Rdx	Snapc3	Ldlrad3
Rsrc1	Smc6	Igf2r
Stim1	Pigt	Zcchc9
Slc24a5	Carnmt1	Bbip1
Dip2b	Slc4a1ap	Bptf
Togaram1	Cldnd1	Psma4
Cstf3	Tcerg1	Gzf1
Nrf1	Mbtd1	Lypla1
Dcaf17	Zbtb5	2700049A03Rik
Sf3a3	Pcf11	Mpnd
Cited2	Btg2	Zranb2
Thap12	Prr3	Il21r
Ppp1r12c	Abcb1a	Qtrt2
Apbb1ip	Ints8	Washc4
Tln1	Etv6	Dennd4a
Fam172a	Med29	Slamf1
Phf14	Akap9	Fbxo28
St6gal1	Nek4	Dock9
Mov10	Wdr33	Bora
Sp4	Herpud1	Prdx1
Dcun1d4	9330175E14Rik	Oxa1l
Tacc1	1810013L24Rik	Dusp5
Mat2a	Tradd	Acad10
Mycbp2	Ep300	Man2b1
Pias1	Rdx	Eif2b3
Armc7	Rsrc1	Plbd2
Phf20	Stim1	Magt1
Kmt2a	Impa1	Naa20
Khdrbs1	Hadh	Cdc37l1
Strn	Snx16	Plcxd2
Ppp1r16b	Slc24a5	Esf1
Arid2	Rtn3	Pds5b
Eri3	S1pr1	Anapc7
Vezf1	Tubb6	D6Wsu163e
Ubac2	Dip2b	Prorsd1
Huwe1	Togaram1	Ufl1
Smc1a	Cstf3	Ide
Ctps2	Nrf1	Trp53i13
Rpsa	Atp6v1b2	Etaa1
R3hdm2	Micu1	Mmgt2
Ggcx	Glrx3	Rif1
Bfar	Dcaf17	Rdh14
Fam193a	Sf3a3	Katnbl1
Itpkb	Rpa2	Atg3
Cops4	Rab33b	Zfp955b
Abhd17b	Nkapd1	Aktip
Vps35	Gnl2	Zbtb1
Prkcb	Ppp1r14b	Cep57
Dgkz	Cited2	4930469K13Rik
Cop1	Thap12	Usp47
Amer1	Ppp1r12c	Ube2b
Calu	Apbb1ip	Snapc3
Babam2	Tln1	Ube2k
Herc4	Med27	Smc6
Relt	Fam172a	Ccdc85c
Ttc17	Srcap	Pigt
Aim2	Zdhhc5	Carnmt1
Skp1a	Phf14	Slc4a1ap
Mgmt	St6gal1	Cldnd1
Klc1	Mov10	Tcerg1
Knop1	Sp4	Mbtd1
C1d	Dcun1d4	Zbtb5
Zc3hav1l	Tacc1	Rbmxl1
Gnpda2	Mycbp2	Pcf11
Tax1bp1	Pias1	Btg2
Wdr20	Armc7	Prr3
Map2k2	Phf20	Abcb1a
Supt20	Khdrbs1	Ints8
Sqle	Strn	Etv6
Lamtor4	Arid2	Med29
Mier1	Eri3	Akap9
Map3k2	Ubac2	Nek4
Fars2	Smc1a	Wdr33
Kdm4c	Rpsa	Lbhd1
Dnajc8	Ggcx	Herpud1
Nisch	Fam193a	9330175E14Rik
Mapk3	Itpkb	1810013L24Rik
Capn10	Abhd17b	Tradd
Nat14	Prkcb	Ep300
Rapgef6	Dgkz	Rdx
Ctdspl2	Cop1	Rsrc1
Ubr1	Amer1	Stim1
Acrbp	Babam2	Impa1
Rbm27	Herc4	Hadh
Atr	Relt	Snx16
Ppm1h	Ttc17	Slc24a5
Dnm1l	Aim2	Rtn3
Zer1	Skp1a	S1pr1
Snx9	Mgmt	Tubb6
Nap1l1	Klc1	Dip2b
Lrrc8d	Knop1	Togaram1
Arhgap39	C1d	Cstf3
Polr3c	Zc3hav1l	Nrf1
Lclat1	Gnpda2	Atp6v1b2
Fra10ac1	Tax1bp1	Micu1
Ppie	Wdr20	Glrx3
Ccdc6	Map2k2	Dcaf17
Itch	Supt20	Sf3a3
Prkcq	Sqle	Rpa2
Gramd3	Lamtor4	Rab33b
Cpeb2	Mier1	Nkapd1
Zfp260	Map3k2	Gnl2
Klhl28	Fars2	Ppp1r14b
B3galnt2	Kdm4c	Cited2
Rabep1	Dnajc8	Thap12
Mrpl46	Nisch	Ppp1r12c
Sppl3	Mapk3	Apbb1ip
Trim7	Capn10	Tln1
Maml3	Rapgef6	Med27
Fmo5	Ctdspl2	Fam172a
Dram2	Ubr1	Srcap
Thoc3	Acrbp	Zdhhc5
Stag1	Rbm27	Phf14
Themis	Atr	St6gal1
Lin7c	Ppm1h	Mov10
Zfp748	Dnm1l	Sp4
Senp7	Zer1	Dcun1d4
Tgs1	Snx9	Tacc1
Arhgap15	Nap1l1	Mat2a
Ap3b1	Lrrc8d	Mycbp2
Fancl	Arhgap39	Pias1
Gmip	Polr3c	Armc7
Golgb1	Lclat1	Phf20
Mtap	Ccdc6	Kmt2a
Prune1	Itch	Khdrbs1
Pygb	Prkcq	Strn
Inpp5d	Gramd3	Ppp1r16b
Ing3	Cpeb2	Arid2
Akap12	B3galnt2	Eri3
AI987944	Rabep1	Vezf1
Adam19	Sppl3	Ubac2
Ttf2	Trim7	Huwe1
Atp6v1d	Maml3	Smc1a
Chd1	Fmo5	Ctps2
Bclaf1	Dram2	Rpsa
Acbd6	Thoc3	R3hdm2
Twf2	Lin7c	Ggcx
Micos13	Zfp748	Bfar
Smn1	Senp7	Fam193a
Shoc2	Tgs1	Itpkb
Nat10	Arhgap15	Cops4
Atm	Ap3b1	Abhd17b
Tead1	Fancl	Vps35
Gm27017	Gmip	Prkcb
Ttc19	Golgb1	Dgkz
Preb	Prune1	Cop1
Snrpb2	Pygb	Amer1
1110051M20Rik	Inpp5d	Calu
Trappc11	Ing3	Babam2
Usp7	Akap12	Herc4
Itgb3	AI987944	Relt
Mdp1	Adam19	Ttc17
Eya2	Ttf2	Aim2
Usp39	Atp6v1d	Skp1a
Dcps	Chd1	Mgmt
Nudt21	Usp9x	Klc1
Bdh1	Acbd6	Knop1
Fopnl	Twf2	C1d
Mapkapk2	Ripk1	Zc3hav1l
Nt5dc1	Micos13	Gnpda2
Pkp3	Dnajb2	Tax1bp1
Mmab	Ripor3	Wdr20
Tipin	Setd2	Map2k2
Fam168a	Itga9	Supt20
Cyb5b	Traf3ip2	Sqle
Ddx47	Utp14a	Lamtor4
Pard6g	Ubxn8	Mier1
Hsd17b11	Gata1	Map3k2
Arrb1	Parn	Fars2
Tra2b	Top2b	Kdm4c
Sft2d2	Polg2	Dnajc8
Btd	Sfr1	Nisch
Stam2	Zfp994	Mapk3
Isoc1	Rabif	Capn10
Bcl9l	Rhbdd1	Nat14
Taf1a	Wdr78	Rapgef6
Tkt	Parp9	Ctdspl2
Gpr83	Tmem242	Ubr1
Psen1	Ankrd52	Acrbp
Tmem18	Ccl25	Rbm27
Slc35f6	Eif4e3	Atr
Mta3	Smad4	Ppm1h
Gm3604	Fam117a	Dnm1l
Mapk8	Amz2	Zer1
Ube2q2	Il2ra	Snx9
Edc3	Nat10	Nap1l1
Abraxas1	Tead1	Lrrc8d
Cdc14b	Gm27017	Arhgap39
Mpp1	Ttc19	Polr3c
Stx16	Preb	Lclat1
Nbr1	1110051M20Rik	Fra10ac1
Npepl1	Trappc11	Ppie
Mfsd14a	Arid3b	Ccdc6
Dhfr	Zc3h13	Itch
Foxo4	Tex14	Prkcq
4732487G21Rik	Bin1	Gramd3
Ccnl2	Eef1g	Cpeb2
Ywhab	Ntrk3	Zfp260
Vhl	Ccdc14	Klhl28
Cables2	Pwp1	B3galnt2
Pigk	Usp7	Rabep1
Mrgbp	Itgb3	Mrpl46
Arl5c	Sec61a1	Sppl3
Lgals1	Mdp1	Trim7
Spdya	Eya2	Maml3
Arih2	Dcps	Fmo5
Slc9a8	Nudt21	Dram2
2310022B05Rik	Bdh1	Thoc3
Pfkfb4	Mapkapk2	Stag1
Pafah1b2	Nt5dc1	Themis
Cript	Pkp3	Lin7c
Pole	Mmab	Zfp748
Dynll2	Tipin	Senp7
Plekhb2	Fam168a	Tgs1
Rundc3a	Rreb1	Arhgap15
H2ax	Ccdc47	Ap3b1
Arf3	Tpp1	Fancl
Gbp2	Pard6g	Gmip
Prps2	Smpdl3b	Golgb1
Prps1	Arrb1	Mtap
Arfrp1	Tra2b	Prune1
Fam219b	Sft2d2	Pygb
Ipo11	Btd	Inpp5d
Eif4h	Stam2	Ing3
Nfs1	Isoc1	Akap12
Arhgef7	Bcl9l	AI987944
Cdc34	Taf1a	Adam19
Slc4a8	Tkt	Ttf2
Dnajb14	Psen1	Atp6v1d
Pdrg1	Tmem18	Chd1
Ccdc163	Slc35f6	Bclaf1
Flvcr1	Sgcb	Usp9x
Ikbkg	Heatr3	Acbd6
Mxi1	Fam117b	Twf2
Hpgds	Mta3	Ripk1
Nipsnap2	Gm3604	Micos13
Mars2	Mapk8	Dnajb2
Gm5134	Rin3	Ripor3
Letmd1	Ube2q2	Setd2
Ap2b1	Edc3	Itga9
AU022252	Abraxas1	Traf3ip2
Eaf1	Clip1	Utp14a
Plekhn1	Cdc14b	Ubxn8
Tbc1d15	Mpp1	Gata1
Med18	Stx16	Parn
Gm12185	Nbr1	Top2b
Pttg1ip	Npepl1	Polg2
Acss2	Mad2l1	Sfr1
Trmt2a	Mfsd14a	Zfp994
Pde4d	Dhfr	Rabif
Unc119b	Polr3k	Rhbdd1
Apip	Foxo4	Wdr78
AU041133	4732487G21Rik	Parp9
Dnah8	Ccnl2	Tmem242
Arl1	Ywhab	Ankrd52
Rab6b	Vhl	Ccl25
Gpr19	Cables2	Eif4e3
Hectd4	Pigk	Smad4
Fam3c	Arl5c	Fam117a
Ints10	Lgals1	Amz2
Rhot2	Spdya	Il2ra
Tram2	Arih2	Smn1
Usp54	Slc9a8	Shoc2
Mob2	2310022B05Rik	Nat10
B3glct	Pfkfb4	Atm
Nfyc	Pafah1b2	Tead1
Haus1	Cript	Gm27017
Arpc5	Dynll2	Ttc19
Kif18b	Plekhb2	Preb
Raver2	Rundc3a	Snrpb2
Slc7a6os	H2ax	1110051M20Rik
Slc25a1	Arf3	Trappc11
Mms22l	Gbp2	Arid3b
Dvl3	Prps2	Zc3h13
Dctd	Prps1	Tex14
Pcmt1	Arfrp1	Bin1
Serp1	Fam219b	Eef1g
Skap2	Ifngr2	Ntrk3
Fam234b	Eif4h	Ccdc14
Rbpj	Nras	Pwp1
Dcp1a	Nfs1	Usp7
Rgs12	Arhgef7	Itgb3
Cchcr1	Cdc34	Sec61a1
Pip5k1b	Slc4a8	Mdp1
Mettl26	Dnajb14	Eya2
Laptm4a	Mtln	Usp39
Dync1li2	Pdrg1	Dcps
Tnfrsf1b	Ccdc163	Nudt21
Tmem201	Flvcr1	Bdh1
Higd1a	Ikbkg	Fopnl
Uchl5	1810030O07Rik	Mapkapk2
Mdfic	Mxi1	Nt5dc1
Dqx1	Nipsnap2	Pkp3
Pdzd8	Mars2	Mmab
Mphosph9	Gm5134	Tipin
Ap3s2	Letmd1	Fam168a
Ethe1	Ap2b1	Rreb1
Man1b1	AU022252	Cyb5b
Rpl21	Eaf1	Ccdc47
Ascc1	Plekhn1	Ddx47
Spcs3	Tbc1d15	Tpp1
Pigg	Med18	Pard6g
Necap2	Rexo5	Smpdl3b
Zc3h12d	Gm12185	Hsd17b11
H1f2	Pttg1ip	Arrb1
Dyrk1a	Acss2	Tra2b
Mtmr3	Pde4d	Sft2d2
Tfdp2	Unc119b	Btd
Cs	Apip	Stam2
Rab8a	AU041133	Isoc1
Gpatch2	Tamm41	Bcl9l
Cdkn2aipnl	Dnah8	Taf1a
Rnf185	Arl1	Tkt
Cep41	Rab6b	Gpr83
Acap2	Gpr19	Psen1
Sap30bp	Hectd4	Tmem18
Rfwd3	Fam3c	Slc35f6
Cluh	Ints10	Sgcb
Wdr4	Tram2	Heatr3
Cdc73	Usp54	Fam117b
Fntb	Mob2	Mta3
Trappc12	B3glct	Gm3604
Sec16a	Nfyc	Mapk8
Tnpo2	Haus1	Rin3
Snf8	Arpc5	Ube2q2
Sntg1	Raver2	Edc3
Zfand3	Slc7a6os	Abraxas1
Gid4	Slc25a1	Clip1
Rab37	Dvl3	Cdc14b
Szrd1	Dctd	Mpp1
Flot1	Ugcg	Stx16
Gabarapl1	Pcmt1	Nbr1
Adar	Serp1	Npepl1
Ugp2	Skap2	Mad2l1
Iba57	Mrps25	Mfsd14a
Neurl4	Fam234b	Dhfr
Iigp1	Rbpj	Polr3k
Atg2b	Dcp1a	Foxo4
Frmd8	Rgs12	4732487G21Rik
Ms4a6c	Cchcr1	Ccnl2
Rab10	Mettl26	Ywhab
Tmem120a	Laptm4a	Vhl
Tm7sf2	Dync1li2	Cables2
Pou2f1	Tnfrsf1b	Pigk
Wdyhv1	Tmem201	Mrgbp
Jmjd4	Higd1a	Arl5c
Rnf157	Uchl5	Lgals1
Agap3	Trip13	Spdya
Rps16	Mdfic	Arih2
Pskh1	Dqx1	Slc9a8
Fam169b	Pdzd8	2310022B05Rik
Fads1	Mbnl1	Pfkfb4
Sfi1	Mphosph9	Pafah1b2
Mtpn	Ap3s2	Cript
H2-T24	Ethe1	Pole
Fbxl5	Man1b1	Dynll2
Blmh	Gorab	Plekhb2
Dennd3	Ascc1	Rundc3a
Lsm6	Spcs3	H2ax
Mosmo	Pigg	Arf3
C1qtnf4	H2bc4	Gbp2
Ddhd1	Plekhm1	Prps2
Impad1	Zc3h12d	Prps1
Zmat3	H1f2	Arfrp1
Ufm1	Cetn3	Fam219b
Lypd6b	Dyrk1a	Ipo11
Maml1	Tfdp2	Ifngr2
Dtymk	Cs	Eif4h
Gm19705	Rab8a	Nras
Mtfr1l	Cdkn2aipnl	Nfs1
Tmem123	Rnf185	Arhgef7
Stard5	9930104L06Rik	Cdc34
Ube2v2	Tmbim6	Slc4a8
Pex11g	Cep41	Dnajb14
Ctps	Acap2	Mtln
Syne2	Sap30bp	Pdrg1
Prkar1a	Rfwd3	Ccdc163
Exoc2	Cluh	Flvcr1
Agtrap	Wdr4	Ikbkg
Pcm1	Cdc73	1810030O07Rik
Wipi2	Fntb	Mxi1
Ubqln1	Gch1	Hpgds
Trmt61a	Sec16a	Nipsnap2
Oip5os1	Tnpo2	Mars2
Hsbp1	Snf8	Gm5134
Pdxk	Sntg1	Letmd1
Armc3	Gid4	Ap2b1
Apopt1	Rab37	AU022252
Trim17	Szrd1	Eaf1
Dusp10	Flot1	Plekhn1
Fam210a	Gabarapl1	Tbc1d15
Scamp3	Adar	Med18
Acbd3	Ugp2	Rexo5
Atp6v1a	Neurl4	Gm12185
Lmtk2	Atg2b	Pttg1ip
Ripor2	Mapk9	Acss2
Raet1e	Frmd8	Trmt2a
Ipo7	Ms4a6c	Pde4d
Rps7	Rab10	Unc119b
Mfsd6	Mllt10	Apip
Itpr2	Ogfod2	AU041133
Slc46a3	Tmem120a	Tamm41
Gatad2b	Tm7sf2	Dnah8
Arpc5l	Dennd11	Arl1
Csk	Pou2f1	Rab6b
Gtpbp6	Pacs2	Gpr19
Zhx2	Wdyhv1	Hectd4
Snx12	Tma16	Fam3c
Thyn1	Jmjd4	Ints10
Gnmt	Rnf157	Rhot2
Dpp8	Agap3	Tram2
Kntc1	Rps16	Usp54
Atp6v1e1	Pskh1	Mob2
Spindoc	Fam169b	B3glct
Cd46	Fads1	Nfyc
Sfpq	Sfi1	Haus1
Ubp1	Mtpn	Arpc5
Map4k3	H2-T24	Kif18b
Ppp2r2a	Fbxl5	Raver2
Rpl14	Dennd3	Slc7a6os
Zfp207	Lsm6	Slc25a1
Poglut1	Mosmo	Mms22l
Memo1	Vamp4	Dvl3
Pabpc4	C1qtnf4	Dctd
Atp5g1	Ddhd1	Ugcg
Ube2q1	Impad1	Pcmt1
Gm42417	Zmat3	Serp1
Srprb	Ufm1	Skap2
Lcorl	Maml1	Mrps25
Secisbp2l	Gm19705	Fam234b
Tg	Mtfr1l	Rbpj
Tox4	Tmem123	Dcp1a
Rhbdf2	Stard5	Rgs12
Prdm15	Ube2v2	Cchcr1
Arhgap12	Pex11g	Pip5k1b
Larp1b	Ctps	Mettl26
Heatr1	Prkar1a	Laptm4a
Pik3r1	Exoc2	Dync1li2
Zfp61	Nedd1	Tnfrsf1b
Cops3	Agtrap	Tmem201
Ttc26	Pcm1	Higd1a
Lratd2	Wipi2	Uchl5
Rdh11	Ubqln1	Trip13
Rrp12	Trmt61a	Mdfic
Ttbk2	Oip5os1	Dqx1
Nop10	Hsbp1	Pdzd8
Tmem238	Pdxk	Mbnl1
Mtrr	Armc3	Mphosph9
Bola2	Apopt1	Ap3s2
Med24	Atrnl1	Ethe1
Nampt	Ar	Man1b1
Ccr9	Trim17	Gorab
Hspa9	Dusp10	Rpl21
Chuk	Fam210a	Ascc1
Coq4	Mypop	Spcs3
Tbc1d16	Scamp3	Pigg
Zxdb	Atp6v1a	H2bc4
Fmnl3	Ripor2	Plekhm1
Nars	Raet1e	Necap2
Vdac2	Ipo7	Zc3h12d
Lrrc58	Rps7	H1f2
Zfp53	Mfsd6	Cetn3
9330136K24Rik	Dbf4	Dyrk1a
Ppp1r8	Gatad2b	Mtmr3
Sgpp1	Csk	Tfdp2
Fbxo8	Gtpbp6	Cs
Tmx1	Zhx2	Rab8a
Zup1	Snx12	Gpatch2
Ppp1cc	Thyn1	Cdkn2aipnl
Eef1d	Gnmt	Rnf185
Dnajc17	Dpp8	9930104L06Rik
Primpol	Atp6v1e1	Tmbim6
Slc3a2	Spindoc	Cep41
Tnnt1	Sfpq	Acap2
Sfxn3	Ubp1	Sap30bp
Mcph1	Map4k3	Rfwd3
Pgm1	Rpl14	Cluh
Ubap1	Zfp207	Wdr4
H2-DMa	Poglut1	Cdc73
Kdm4b	Pabpc4	Fntb
Eif3d	Atp5g1	Gch1
Clk3	Ube2q1	Trappc12
Gid8	Gm42417	Sec16a
Jmy	Lcorl	Tnpo2
Lrrc8b	Secisbp2l	Snf8
Gins3	Tg	Sntg1
Gfod2	Tox4	Zfand3
Orai1	Rhbdf2	Gid4
Coq5	Arhgap12	Rab37
Ccdc28b	Heatr1	Szrd1
Chsy1	Zfp61	Flot1
Taco1	Cops3	Gabarapl1
Mrps24	Ttc26	Adar
Fcsk	Lratd2	Ugp2
Gtf2a1	Rrp12	Iba57
Polr1d	Ttbk2	Neurl4
Stat5a	Nop10	Iigp1
Ilf2	Mtrr	Atg2b
Cmip	Bola2	Mapk9
Thop1	Med24	Frmd8
Psmd12	Ccr9	Ms4a6c
Stx2	Chuk	Rab10
Elf2	Tbc1d16	Mllt10
Dtx1	Zxdb	Ogfod2
NA	Fmnl3	Tmem120a
NA	Nars	Tm7sf2
NA	Vdac2	Dennd11
NA	Lrrc58	Pou2f1
NA	Zfp53	Pacs2
NA	9330136K24Rik	Wdyhv1
NA	Ppp1r8	Tma16
NA	Sgpp1	Jmjd4
NA	Tmx1	Rnf157
NA	Ppp1cc	Agap3
NA	Eef1d	Rps16
NA	Dnajc17	Pskh1
NA	Primpol	Fam169b
NA	Slc3a2	Fads1
NA	Tnnt1	Sfi1
NA	Sfxn3	Mtpn
NA	Ubap1	H2-T24
NA	H2-DMa	Fbxl5
NA	Rps27	Blmh
NA	Pcsk4	Dennd3
NA	Myh10	Lsm6
NA	Kdm4b	Mosmo
NA	Eif3d	Vamp4
NA	Clk3	C1qtnf4
NA	Pi4kb	Ddhd1
NA	Iars2	Impad1
NA	Gid8	Zmat3
NA	Jmy	Ufm1
NA	Ccdc134	Lypd6b
NA	Mroh2a	Maml1
NA	9530068E07Rik	Dtymk
NA	Ctnnbl1	Gm19705
NA	Zfyve28	Mtfr1l
NA	Trak1	Tmem123
NA	Uqcc3	Stard5
NA	Irak3	Ube2v2
NA	Lrrc8b	Pex11g
NA	Pitpna	Ctps
NA	Gins3	Syne2
NA	Kifap3	Prkar1a
NA	Gfod2	Exoc2
NA	Rabep2	Nedd1
NA	Orai1	Agtrap
NA	Frg2f1	Pcm1
NA	Myo1g	Wipi2
NA	Mmut	Ubqln1
NA	5031425E22Rik	Trmt61a
NA	B4galnt4	Oip5os1
NA	Coq5	Hsbp1
NA	Ccdc28b	Pdxk
NA	Taco1	Armc3
NA	Mrps24	Apopt1
NA	Fcsk	Atrnl1
NA	Polr1d	Ar
NA	Stat5a	Trim17
NA	Ilf2	Dusp10
NA	Thop1	Fam210a
NA	Psmd12	Mypop
NA	Mpzl3	Scamp3
NA	Stx2	Acbd3
NA	Gm43552	Atp6v1a
NA	Ppa2	Lmtk2
NA	Irf5	Ripor2
NA	Dtx1	Raet1e
NA	Fam98b	Ipo7
NA	Adcy7	Rps7
NA	NA	Mfsd6
NA	NA	Itpr2
NA	NA	Dbf4
NA	NA	Slc46a3
NA	NA	Gatad2b
NA	NA	Arpc5l
NA	NA	Csk
NA	NA	Gtpbp6
NA	NA	Zhx2
NA	NA	Snx12
NA	NA	Thyn1
NA	NA	Gnmt
NA	NA	Dpp8
NA	NA	Kntc1
NA	NA	Atp6v1e1
NA	NA	Spindoc
NA	NA	Cd46
NA	NA	Sfpq
NA	NA	Ubp1
NA	NA	Map4k3
NA	NA	Ppp2r2a
NA	NA	Rpl14
NA	NA	Zfp207
NA	NA	Poglut1
NA	NA	Memo1
NA	NA	Pabpc4
NA	NA	Atp5g1
NA	NA	Ube2q1
NA	NA	Gm42417
NA	NA	Srprb
NA	NA	Lcorl
NA	NA	Secisbp2l
NA	NA	Tg
NA	NA	Tox4
NA	NA	Rhbdf2
NA	NA	Prdm15
NA	NA	Arhgap12
NA	NA	Larp1b
NA	NA	Heatr1
NA	NA	Pik3r1
NA	NA	Zfp61
NA	NA	Cops3
NA	NA	Ttc26
NA	NA	Lratd2
NA	NA	Rdh11
NA	NA	Rrp12
NA	NA	Ttbk2
NA	NA	Nop10
NA	NA	Tmem238
NA	NA	Mtrr
NA	NA	Bola2
NA	NA	Med24
NA	NA	Nampt
NA	NA	Ccr9
NA	NA	Hspa9
NA	NA	Chuk
NA	NA	Coq4
NA	NA	Tbc1d16
NA	NA	Zxdb
NA	NA	Fmnl3
NA	NA	Nars
NA	NA	Vdac2
NA	NA	Lrrc58
NA	NA	Zfp53
NA	NA	9330136K24Rik
NA	NA	Ppp1r8
NA	NA	Sgpp1
NA	NA	Fbxo8
NA	NA	Tmx1
NA	NA	Zup1
NA	NA	Ppp1cc
NA	NA	Eef1d
NA	NA	Dnajc17
NA	NA	Primpol
NA	NA	Slc3a2
NA	NA	Tnnt1
NA	NA	Sfxn3
NA	NA	Mcph1
NA	NA	Pgm1
NA	NA	Ubap1
NA	NA	H2-DMa
NA	NA	Rps27
NA	NA	Pcsk4
NA	NA	Myh10
NA	NA	Kdm4b
NA	NA	Eif3d
NA	NA	Clk3
NA	NA	Pi4kb
NA	NA	Iars2
NA	NA	Gid8
NA	NA	Jmy
NA	NA	Ccdc134
NA	NA	Mroh2a
NA	NA	9530068E07Rik
NA	NA	Ctnnbl1
NA	NA	Zfyve28
NA	NA	Trak1
NA	NA	Uqcc3
NA	NA	Irak3
NA	NA	Lrrc8b
NA	NA	Pitpna
NA	NA	Gins3
NA	NA	Kifap3
NA	NA	Gfod2
NA	NA	Rabep2
NA	NA	Orai1
NA	NA	Frg2f1
NA	NA	Myo1g
NA	NA	Mmut
NA	NA	5031425E22Rik
NA	NA	B4galnt4
NA	NA	Coq5
NA	NA	Ccdc28b
NA	NA	Chsy1
NA	NA	Taco1
NA	NA	Mrps24
NA	NA	Fcsk
NA	NA	Gtf2a1
NA	NA	Polr1d
NA	NA	Stat5a
NA	NA	Ilf2
NA	NA	Cmip
NA	NA	Thop1
NA	NA	Psmd12
NA	NA	Mpzl3
NA	NA	Stx2
NA	NA	Gm43552
NA	NA	Ppa2
NA	NA	Irf5
NA	NA	Elf2
NA	NA	Dtx1
NA	NA	Fam98b
NA	NA	Adcy7
