# Supplementary material
Source: HighWire-hosted journal article supplement (doi:10.1101/rna.079897.123)
Supplement: Supplemental_TableS3.xlsx [file Supplemental_TableS3.xlsx]

## Sheet: Sheet1
Row.names	X0.5.wt.01025.48.0.5.wt.0205.48	ENTREZID	SYMBOL	GENENAME	LENGTH
100017	-1	100017	Ldlrap1	low density lipoprotein receptor adaptor protein 1	2736
100019	-1	100019	Mdn1	midasin AAA ATPase 1	21654
100033459	-1	100033459	Ifi208	interferon activated gene 208	5250
100034251	-1	100034251	Wfdc17	WAP four-disulfide core domain 17	469
100036768	-1	100036768	Gm11696	predicted gene 11696	2765
100037278	-1	100037278	Fam129c	family with sequence similarity 129, member C	2588
100037282	1	100037282	Rsph3b	radial spoke 3B homolog (Chlamydomonas)	2485
100038347	-1	100038347	Fam174b	family with sequence similarity 174, member B	2678
100038516	-1	100038516	Gm10640	predicted gene 10640	1134
100038526	1	100038526	Gm10560	predicted gene 10560	843
100038847	1	100038847	Gm10406	predicted gene 10406	2325
100038882	1	100038882	Isg15	ISG15 ubiquitin-like modifier	756
100038947	-1	100038947	Sirpb1c	signal-regulatory protein beta 1C	2227
100039062	1	100039062	Gm2027	nuclear assembly factor 1 homolog pseudogene	3025
100039123	1	100039123	Gm14295	predicted gene 14295	1311
100039684	-1	100039684	5031434O11Rik	RIKEN cDNA 5031434O11 gene	717
100039796	1	100039796	Tgtp2	T cell specific GTPase 2	2816
100039805	1	100039805	D5Ertd605e	DNA segment, Chr 5, ERATO Doi 605, expressed	1062
100040208	1	100040208	Gm2663	predicted gene 2663	870
100040462	-1	100040462	Mndal	myeloid nuclear differentiation antigen like	2469
100040608	1	100040608	Fancf	Fanconi anemia, complementation group F	1691
100041231	1	100041231	Gm3219	B-cell CLL/lymphoma 7C pseudogene	604
100041480	1	100041480	Gm9833	myelin basic protein expression factor 2, repressor pseudogene	1660
100041515	1	100041515	Gm3383	predicted gene 3383	6721
100041576	-1	100041576	Gm3414	predicted gene 3414	7912
100041979	1	100041979	Gm3604	predicted gene 3604	2919
100042149	1	100042149	Gm3696	predicted gene 3696	2379
100042166	-1	100042166	Gm3704	predicted gene 3704	2310
100042415	1	100042415	Mnd1-ps	Mnd1 retrotransposed pseudogene	2774
100042480	-1	100042480	Nhsl2	NHS-like 2	14953
100042498	-1	100042498	Mir22hg	Mir22 host gene (non-protein coding)	1766
100042757	-1	100042757	Gm4013	predicted gene 4013	416
100042784	-1	100042784	Prdm11	PR domain containing 11	4545
100043189	-1	100043189	Gm4285	predicted gene 4285	1363
100043314	1	100043314	Tigit	T cell immunoreceptor with Ig and ITIM domains	963
100043489	-1	100043489	1300002E11Rik	RIKEN cDNA 1300002E11 gene	3959
100043597	-1	100043597	Srcap	Snf2-related CREBBP activator protein	14421
100043636	1	100043636	AI662270	expressed sequence AI662270	1408
100043688	-1	100043688	Amy2a2	amylase 2a2	7556
100043757	-1	100043757	Zfp831	zinc finger protein 831	9805
100043911	-1	100043911	Ppp4r1l-ps	protein phosphatase 4, regulatory subunit 1-like, pseudogene	8745
100044193	1	100044193	Gm20939	predicted gene, 20939	2491
100044509	-1	100044509	Tgfbr3l	transforming growth factor, beta receptor III-like	1075
100088	1	100088	Rcc1	regulator of chromosome condensation 1	3431
100177	-1	100177	Zmym6	zinc finger, MYM-type 6	7332
100182	-1	100182	Akna	AT-hook transcription factor	6341
100198	-1	100198	H6pd	hexose-6-phosphate dehydrogenase (glucose 1-dehydrogenase)	4951
100201	-1	100201	Tmem64	transmembrane protein 64	4681
100210	1	100210	Gpn2	GPN-loop GTPase 2	1356
100216537	-1	100216537	Snord104	small nucleolar RNA, C/D box 104	73
100217419	-1	100217419	Snora52	small nucleolar RNA, H/ACA box 52	134
100217454	-1	100217454	Snord37	small nucleolar RNA, C/D box 37	53
100217457	-1	100217457	Snord58b	small nucleolar RNA, C/D box 58B	109
100302498	-1	100302498	Snora21	small nucleolar RNA, H/ACA box 21	128
100302648	-1	100302648	Gm11944	predicted gene 11944	869
100302688	-1	100302688	Gm17455	predicted gene, 17455	857
100303732	-1	100303732	Zfp967	zinc finger protein 967	12569
100303751	-1	100303751	Snora31	small nucleolar RNA, H/ACA box 31	112
100316773	-1	100316773	Mir1893	microRNA 1893	83
100316778	-1	100316778	Mir1982	microRNA 1982	74
100316903	-1	100316903	Gm20605	predicted gene 20605	4751
100316932	-1	100316932	Snora28	small nucleolar RNA, H/ACA box 28	121
100340	1	100340	Smpdl3b	sphingomyelin phosphodiesterase, acid-like 3B	1925
100359413	-1	100359413	AA413626	ribosomal protein L17 pseudogene	403
100382	-1	100382	AW011738	expressed sequence AW011738	2745
100383	-1	100383	Bsdc1	BSD domain containing 1	2659
100384868	1	100384868	Gm37013	predicted gene, 37013	4621
100415915	-1	100415915	A530072M11Rik	RIKEN cDNA gene A530072M11	2859
100465	-1	100465	Mob3c	MOB kinase activator 3C	2882
100494	-1	100494	Zfand2a	zinc finger, AN1-type domain 2A	3106
100502630	-1	100502630	Gm15545	predicted gene 15545	1090
100502734	-1	100502734	Gm16023	predicted gene 16023	2493
100502766	1	100502766	Kifc1	kinesin family member C1	2539
100502842	1	100502842	Gm14718	predicted gene 14718	756
100502868	1	100502868	Gm20597	predicted gene, 20597	5486
100502942	-1	100502942	Gm4814	predicted gene 4814	907
100503021	1	100503021	Gm19510	predicted gene, 19510	1861
100503085	-1	100503085	Klhl3	kelch-like 3	2142
100503104	-1	100503104	Gm19557	predicted gene, 19557	2765
100503120	-1	100503120	A930006K02Rik	RIKEN cDNA A930006K02 gene	778
100503147	-1	100503147	Gm13293	predicted gene 13293	1609
100503178	-1	100503178	2810013P06Rik	RIKEN cDNA 2810013P06 gene	2028
100503272	-1	100503272	Gm11423	predicted gene 11423	784
100503280	-1	100503280	Gm38425	predicted gene, 38425	2638
100503353	-1	100503353	Gm14440	predicted gene 14440	6766
100503380	1	100503380	Snhg4	small nucleolar RNA host gene 4	1690
100503386	-1	100503386	Tpbgl	trophoblast glycoprotein-like	3037
100503460	-1	100503460	Gm19705	predicted gene, 19705	489
100503583	1	100503583	Fsbp	fibrinogen silencer binding protein	4572
100503605	-1	100503605	Hbb-bs	hemoglobin, beta adult s chain	640
100503652	-1	100503652	Gm16845	predicted gene, 16845	1518
100503676	-1	100503676	Gm38426	predicted gene, 38426	1625
100503790	-1	100503790	Gm19897	predicted gene, 19897	1619
100503823	-1	100503823	Gm16973	predicted gene, 16973	2171
100503915	-1	100503915	Smpd5	sphingomyelin phosphodiesterase 5	1823
100504104	1	100504104	Gm16062	predicted gene 16062	642
100504114	-1	100504114	Gm16907	predicted gene, 16907	2764
100504166	-1	100504166	4933421O10Rik	RIKEN cDNA 4933421O10 gene	3850
100504191	-1	100504191	Gm16576	predicted gene 16576	5404
100504231	-1	100504231	Gm15708	predicted gene 15708	1766
100504309	-1	100504309	Smim27	small integral membrane protein 27	325
100504362	-1	100504362	Gm1987	predicted gene 1987	1740
100504377	-1	100504377	Gm20199	predicted gene, 20199	3997
100504421	-1	100504421	2900076A07Rik	RIKEN cDNA 2900076A07 gene	856
100504425	-1	100504425	Gm20219	predicted gene, 20219	1269
100504491	-1	100504491	Dcdc2b	doublecortin domain containing 2b	864
100504501	-1	100504501	Gm20257	caspase 8 pseudogene	936
100504586	-1	100504586	Gm20300	predicted gene, 20300	3440
100504637	-1	100504637	Gm20324	predicted gene, 20324	1116
100504663	-1	100504663	Atg14	autophagy related 14	3451
100504715	-1	100504715	Tmppe	transmembrane protein with metallophosphoesterase domain	6873
100515	1	100515	Zfp518b	zinc finger protein 518B	6882
100526469	-1	100526469	Mir3064	microRNA 3064	67
100526479	-1	100526479	Mir3082	microRNA 3082	64
100526542	-1	100526542	Mir3113	microRNA 3113	76
100532	-1	100532	Rell1	RELT-like 1	3334
100532730	-1	100532730	C230037L18Rik	RIKEN cDNA C230037L18 gene	1889
100608	1	100608	Noc4l	NOC4 like	2039
100628611	-1	100628611	Mir5107	microRNA 5107	88
100628612	-1	100628612	Mir5113	microRNA 5113	82
100628619	1	100628619	Mir5114	microRNA 5114	61
100637	-1	100637	N4bp2l1	NEDD4 binding protein 2-like 1	3233
100662	-1	100662	D930016D06Rik	RIKEN cDNA D930016D06 gene	5193
100678	1	100678	Psph	phosphoserine phosphatase	1537
100689703	-1	100689703	9330133O14Rik	RIKEN cDNA 9330133O14 gene	2821
100702	1	100702	Gbp6	guanylate binding protein 6	4316
100705	-1	100705	Acacb	acetyl-Coenzyme A carboxylase beta	8793
100732	-1	100732	Mapre3	microtubule-associated protein, RP/EB family, member 3	1906
100861615	1	100861615	LOC100861615	alpha takusan-like	3985
100910	-1	100910	Chpf2	chondroitin polymerizing factor 2	5231
101055769	-1	101055769	Gm12596	predicted gene 12596	1280
101113	1	101113	Snx21	sorting nexin family member 21	3664
101197	-1	101197	Zfp956	zinc finger protein 956	2882
101476	-1	101476	Plekha1	pleckstrin homology domain containing, family A (phosphoinositide binding specific) member 1	7366
101488	-1	101488	Slco2b1	solute carrier organic anion transporter family, member 2b1	4988
101488212	-1	101488212	Evi2	ecotropic viral integration site 2	3964
101497	-1	101497	Plekhg2	pleckstrin homology domain containing, family G (with RhoGef domain) member 2	6361
101540	-1	101540	Prkd2	protein kinase D2	3929
101565	1	101565	Ccp110	centriolar coiled coil protein 110	7774
101568	-1	101568	Vrk3	vaccinia related kinase 3	1767
101602	-1	101602	AI467606	expressed sequence AI467606	1918
101612	1	101612	Grwd1	glutamate-rich WD repeat containing 1	1974
101706	-1	101706	Numa1	nuclear mitotic apparatus protein 1	7402
101809	1	101809	Spred3	sprouty-related EVH1 domain containing 3	4465
101831	1	101831	Faap24	Fanconi anemia core complex associated protein 24	1788
101869	-1	101869	Unc45a	unc-45 myosin chaperone A	3263
101883	-1	101883	Igflr1	IGF-like family receptor 1	2902
101994	1	101994	Champ1	chromosome alignment maintaining phosphoprotein 1	4040
102060	1	102060	Gadd45gip1	growth arrest and DNA-damage-inducible, gamma interacting protein 1	1734
102075	1	102075	Plekhg4	pleckstrin homology domain containing, family G (with RhoGef domain) member 4	5085
102098	-1	102098	Arhgef18	rho/rac guanine nucleotide exchange factor (GEF) 18	8105
102103	-1	102103	Mtus1	mitochondrial tumor suppressor 1	7521
102115	1	102115	Dohh	deoxyhypusine hydroxylase/monooxygenase	2435
102124	1	102124	Enkd1	enkurin domain containing 1	1576
102141	1	102141	Snx25	sorting nexin 25	3371
102216272	1	102216272	Ak6	adenylate kinase 6	990
102238433	-1	102238433	Gm28042	predicted gene, 28042	7575
102308570	1	102308570	Lbhd1	LBH domain containing 1	1150
102334	-1	102334	Ankrd10	ankyrin repeat domain 10	5309
102448	1	102448	Xylb	xylulokinase homolog (H. influenzae)	4079
102465588	-1	102465588	Mir6973a	microRNA 6973a	78
102465670	-1	102465670	Mir7115	microRNA 7115	64
102465997	-1	102465997	Mir8119	microRNA 8119	129
102466208	-1	102466208	Mir6924	microRNA 6924	63
102466236	-1	102466236	Mir7658	microRNA 7658	57
102466797	-1	102466797	Mir7058	microRNA 7058	75
102467006	-1	102467006	Mir8108	microRNA 8108	109
102502	1	102502	Pls1	plastin 1 (I-isoform)	3697
102580	1	102580	Alg9	asparagine-linked glycosylation 9 (alpha 1,2 mannosyltransferase)	2880
102614	1	102614	Rpp25	ribonuclease P/MRP 25 subunit	1346
102635561	-1	102635561	Ggnbp2os	gametogenetin binding protein 2, opposite strand	676
102636620	-1	102636620	Gm15326	predicted gene 15326	1422
102644	1	102644	Oaf	out at first homolog	2388
102693	1	102693	Phldb1	pleckstrin homology like domain, family B, member 1	5930
102747	1	102747	Lrrc49	leucine rich repeat containing 49	5160
102791	-1	102791	Tcta	T cell leukemia translocation altered gene	1629
102800312	-1	102800312	Lncppara	long noncoding RNA near Ppara	1489
102920	1	102920	Cenpi	centromere protein I	4526
103080	1	103080	2010-09-01	septin 10	2654
103135	-1	103135	Pan2	PAN2 poly(A) specific ribonuclease subunit	7496
103136	1	103136	Pwp1	PWP1 homolog, endonuclein	2693
103140	1	103140	Gstt3	glutathione S-transferase, theta 3	1873
103172	1	103172	Chchd10	coiled-coil-helix-coiled-coil-helix domain containing 10	1138
103266	1	103266	Tmem263	transmembrane protein 263	4176
103406	-1	103406	Zfr2	zinc finger RNA binding protein 2	5515
103468	1	103468	Nup107	nucleoporin 107	3453
103551	1	103551	Epop	elongin BC and polycomb repressive complex 2 associated protein	2330
103583	1	103583	Fbxw11	F-box and WD-40 domain protein 11	7513
103611158	1	103611158	Gm38666	predicted gene, 38666	4625
103611159	1	103611159	Gm38667	predicted gene, 38667	4901
103677	-1	103677	Smg6	Smg-6 homolog, nonsense mediated mRNA decay factor (C. elegans)	5799
103733	1	103733	Tubg1	tubulin, gamma 1	1609
103765	1	103765	Tmem17	transmembrane protein 17	1370
103768	1	103768	Tubg2	tubulin, gamma 2	2248
103806	-1	103806	Maml1	mastermind like transcriptional coactivator 1	5552
103963	1	103963	Rpn1	ribophorin I	3642
103964	-1	103964	Try5	trypsin 5	801
103967	1	103967	Dnm3	dynamin 3	14103
103988	1	103988	Gck	glucokinase	3008
104009	-1	104009	Qsox1	quiescin Q6 sulfhydryl oxidase 1	5611
104027	1	104027	Synpo	synaptopodin	7747
104086	-1	104086	Cyp27a1	cytochrome P450, family 27, subfamily a, polypeptide 1	1890
104103	-1	104103	Airn	antisense Igf2r RNA	2188
104111	-1	104111	Adcy3	adenylate cyclase 3	4730
104156	1	104156	Etv5	ets variant 5	3876
104174	1	104174	Gldc	glycine decarboxylase	4152
104175	-1	104175	Sbk1	SH3-binding kinase 1	4092
104184	1	104184	Blmh	bleomycin hydrolase	2355
104215	1	104215	Rhoq	ras homolog family member Q	4122
104271	1	104271	Tex15	testis expressed gene 15	9438
104303	1	104303	Arl1	ADP-ribosylation factor-like 1	842
104346	1	104346	Gas8	growth arrest specific 8	1923
104366	-1	104366	Snora64	small nucleolar RNA, H/ACA box 64	117
104383	1	104383	Rcor2	REST corepressor 2	2461
104401	-1	104401	Pcnx3	pecanex homolog 3	8131
104418	-1	104418	Dgkz	diacylglycerol kinase zeta	5019
104444	1	104444	Rexo2	RNA exonuclease 2	2372
104458	1	104458	Rars	arginyl-tRNA synthetase	2131
104479	-1	104479	Ccdc117	coiled-coil domain containing 117	3401
104721	1	104721	Ddx1	DEAD (Asp-Glu-Ala-Asp) box polypeptide 1	2469
104732	1	104732	Tedc1	tubulin epsilon and delta complex 1	3462
104759	-1	104759	Pld4	phospholipase D family, member 4	2340
104776	-1	104776	Aldh6a1	aldehyde dehydrogenase family 6, subfamily A1	3343
104871	1	104871	Spata7	spermatogenesis associated 7	3306
104884	1	104884	Tdp1	tyrosyl-DNA phosphodiesterase 1	5158
104886	1	104886	Rab15	RAB15, member RAS oncogene family	3126
105000	1	105000	Dnal1	dynein, axonemal, light chain 1	5886
105005	1	105005	Lratd1	LRAT domain containing 1	3380
105083	1	105083	Pelo	pelota mRNA surveillance and ribosome rescue factor	2066
105148	1	105148	Iars	isoleucine-tRNA synthetase	4396
105171	-1	105171	Arrdc3	arrestin domain containing 3	6136
105180375	-1	105180375	Tmem265	transmembrane protein 265	1221
105203	-1	105203	Tasor2	transcription activation suppressor family member 2	9280
105239	-1	105239	Rnf44	ring finger protein 44	4410
105348	-1	105348	Golm1	golgi membrane protein 1	3693
105349	1	105349	Akr1c18	aldo-keto reductase family 1, member C18	1172
105351	1	105351	AW209491	expressed sequence AW209491	2023
105352	1	105352	Dusp22	dual specificity phosphatase 22	5053
105372	1	105372	Utp15	UTP15 small subunit processome component	4071
105377	1	105377	Slf1	SMC5-SMC6 complex localization factor 1	5061
105501	1	105501	Abhd4	abhydrolase domain containing 4	3022
105670	-1	105670	Rcbtb2	regulator of chromosome condensation (RCC1) and BTB (POZ) domain containing protein 2	6918
105689	-1	105689	Mycbp2	MYC binding protein 2, E3 ubiquitin protein ligase	18996
105785	1	105785	Kdelr3	KDEL (Lys-Asp-Glu-Leu) endoplasmic reticulum protein retention receptor 3	1414
105827	-1	105827	Amigo2	adhesion molecule with Ig like domain 2	3214
105835	1	105835	Sgsm3	small G protein signaling modulator 3	3312
105837	1	105837	Mtbp	Mdm2, transformed 3T3 cell double minute p53 binding protein	5119
105988	1	105988	Espl1	extra spindle pole bodies 1, separase	6684
106059	-1	106059	A430088P11Rik	RIKEN cDNA A430088P11 gene	4502
106064	-1	106064	AW549877	expressed sequence AW549877	5207
106344	1	106344	Rfc4	replication factor C (activator 1) 4	1366
106347	-1	106347	Ildr1	immunoglobulin-like domain containing receptor 1	4194
106393	1	106393	Srl	sarcalumenin	4978
106504	-1	106504	Stk38	serine/threonine kinase 38	3394
106512	-1	106512	Gpsm3	G-protein signalling modulator 3 (AGS3-like, C. elegans)	1343
106565	1	106565	Dlk2	delta like non-canonical Notch ligand 2	1566
106572	-1	106572	Rab31	RAB31, member RAS oncogene family	4141
106581	-1	106581	Fam234a	family with sequence similarity 234, member A	2863
106585	-1	106585	Ankrd12	ankyrin repeat domain 12	10873
106618	1	106618	Wdr90	WD repeat domain 90	6281
106628	1	106628	Trip10	thyroid hormone receptor interactor 10	2458
106639	-1	106639	Vmac	vimentin-type intermediate filament associated coiled-coil protein	2276
106672	-1	106672	AI413582	expressed sequence AI413582	637
106707	1	106707	Rpusd1	RNA pseudouridylate synthase domain containing 1	1703
106757	-1	106757	Catsperd	cation channel sperm associated auxiliary subunit delta	3577
106794	-1	106794	Dhx57	DEAH (Asp-Glu-Ala-Asp/His) box polypeptide 57	6569
106795	1	106795	Tcf19	transcription factor 19	1773
106869	1	106869	Tnfaip8	tumor necrosis factor, alpha-induced protein 8	3568
106878	1	106878	Smim3	small integral membrane protein 3	1986
106952	-1	106952	Arap3	ArfGAP with RhoGAP domain, ankyrin repeat and PH domain 3	6823
107022	-1	107022	Gramd3	GRAM domain containing 3	5523
107045	1	107045	Lars	leucyl-tRNA synthetase	3806
107071	1	107071	Wdr74	WD repeat domain 74	1204
107094	1	107094	Rrp12	ribosomal RNA processing 12 homolog (S. cerevisiae)	4320
107227	-1	107227	Macrod1	MACRO domain containing 1	1275
107239	-1	107239	Carns1	carnosine synthase 1	4209
107271	1	107271	Yars	tyrosyl-tRNA synthetase	2874
107272	1	107272	Psat1	phosphoserine aminotransferase 1	2774
107350	1	107350	AW112010	expressed sequence AW112010	775
107373	1	107373	Fam111a	family with sequence similarity 111, member A	3199
107375	-1	107375	Slc25a45	solute carrier family 25, member 45	2222
107435	1	107435	Hat1	histone aminotransferase 1	3957
107448	-1	107448	Unc5a	unc-5 netrin receptor A	3974
107449	1	107449	Unc5b	unc-5 netrin receptor B	6256
107476	1	107476	Acaca	acetyl-Coenzyme A carboxylase alpha	11823
107477	-1	107477	Guca1b	guanylate cyclase activator 1B	1668
107503	1	107503	Atf5	activating transcription factor 5	1993
107508	1	107508	Eprs	glutamyl-prolyl-tRNA synthetase	7107
107513	1	107513	Ssr1	signal sequence receptor, alpha	10200
107515	1	107515	Lgr4	leucine-rich repeat-containing G protein-coupled receptor 4	5060
107522	1	107522	Ece2	endothelin converting enzyme 2	6352
107526	-1	107526	Gimap4	GTPase, IMAP family member 4	1810
107527	-1	107527	Il1rl2	interleukin 1 receptor-like 2	1950
107528	1	107528	Magee1	melanoma antigen, family E, 1	3516
107587	1	107587	Osr2	odd-skipped related 2	1792
107607	-1	107607	Nod1	nucleotide-binding oligomerization domain containing 1	4415
107686	1	107686	Snrpd2	small nuclear ribonucleoprotein D2	488
107723	-1	107723	Slc12a6	solute carrier family 12, member 6	9724
107733	1	107733	Mrpl41	mitochondrial ribosomal protein L41	2423
107767	1	107767	Scamp1	secretory carrier membrane protein 1	3963
107771	1	107771	Bmyc	brain expressed myelocytomatosis oncogene	841
107815	1	107815	Scml2	Scm polycomb group protein like 2	5799
107823	1	107823	Nsd2	nuclear receptor binding SET domain protein 2	14658
107869	1	107869	Cth	cystathionase (cystathionine gamma-lyase)	1801
107975	-1	107975	Pacs1	phosphofurin acidic cluster sorting protein 1	4870
107986	-1	107986	Ddb2	damage specific DNA binding protein 2	2810
107993	-1	107993	Bfsp2	beaded filament structural protein 2, phakinin	1606
107995	1	107995	Cdc20	cell division cycle 20	2571
108000	1	108000	Cenpf	centromere protein F	11122
108014	1	108014	Srsf9	serine/arginine-rich splicing factor 9	1252
108037	1	108037	Shmt2	serine hydroxymethyltransferase 2 (mitochondrial)	2305
108052	-1	108052	Slc14a1	solute carrier family 14 (urea transporter), member 1	3995
108067	1	108067	Eif2b3	eukaryotic translation initiation factor 2B, subunit 3	4069
108072	-1	108072	Grm6	glutamate receptor, metabotropic 6	5307
108086	1	108086	Rnf216	ring finger protein 216	5823
108089	-1	108089	Rnf144a	ring finger protein 144A	5172
108098	1	108098	Med21	mediator complex subunit 21	780
108105	-1	108105	B3gnt5	UDP-GlcNAc:betaGal beta-1,3-N-acetylglucosaminyltransferase 5	4872
108112	-1	108112	Eif4ebp3	eukaryotic translation initiation factor 4E binding protein 3	1151
108115	1	108115	Slco4a1	solute carrier organic anion transporter family, member 4a1	4018
108121	1	108121	U2af1	U2 small nuclear ribonucleoprotein auxiliary factor (U2AF) 1	974
108143	1	108143	Taf9	TATA-box binding protein associated factor 9	2084
108147	1	108147	Atic	5-aminoimidazole-4-carboxamide ribonucleotide formyltransferase/IMP cyclohydrolase	5181
108155	-1	108155	Ogt	O-linked N-acetylglucosamine (GlcNAc) transferase (UDP-N-acetylglucosamine:polypeptide-N-acetylglucosaminyl transferase)	6706
108156	1	108156	Mthfd1	methylenetetrahydrofolate dehydrogenase (NADP+ dependent), methenyltetrahydrofolate cyclohydrolase, formyltetrahydrofolate synthase	3324
108652	-1	108652	Slc35b3	solute carrier family 35, member B3	3146
108657	-1	108657	Rnpepl1	arginyl aminopeptidase (aminopeptidase B)-like 1	3039
108670	-1	108670	Epsti1	epithelial stromal interaction 1 (breast)	2322
108671	1	108671	Dnajc9	DnaJ heat shock protein family (Hsp40) member C9	2126
108672	-1	108672	Zdhhc15	zinc finger, DHHC domain containing 15	5508
108682	1	108682	Gpt2	glutamic pyruvate transaminase (alanine aminotransferase) 2	5283
108723	-1	108723	Card11	caspase recruitment domain family, member 11	4235
108737	1	108737	Oxsr1	oxidative-stress responsive 1	4775
108767	-1	108767	Pnrc1	proline-rich nuclear receptor coactivator 1	1925
108797	-1	108797	Mex3b	mex3 RNA binding family member B	3416
108811	1	108811	Ccdc122	coiled-coil domain containing 122	1932
108829	-1	108829	Jmjd1c	jumonji domain containing 1C	10944
108832	1	108832	Tmem74b	transmembrane protein 74B	1959
108857	-1	108857	Ankhd1	ankyrin repeat and KH domain containing 1	9272
108899	1	108899	2700081O15Rik	RIKEN cDNA 2700081O15 gene	5216
108900	1	108900	Fam72a	family with sequence similarity 72, member A	2105
108907	1	108907	Nusap1	nucleolar and spindle associated protein 1	2960
108909	1	108909	Aida	axin interactor, dorsalization associated	3426
108911	1	108911	Rcc2	regulator of chromosome condensation 2	3767
108912	1	108912	Cdca2	cell division cycle associated 2	5179
108943	1	108943	Trmt10a	tRNA methyltransferase 10A	7437
108956	-1	108956	Apol7c	apolipoprotein L 7c	2044
108961	1	108961	E2f8	E2F transcription factor 8	3880
108995	-1	108995	Tbc1d10c	TBC1 domain family, member 10c	2291
109019	1	109019	Nabp1	nucleic acid binding protein 1	6146
109042	1	109042	Cavin3	caveolae associated 3	1026
109054	1	109054	Pfdn4	prefoldin 4	1059
109077	1	109077	Ints5	integrator complex subunit 5	3294
109079	1	109079	Sephs1	selenophosphate synthetase 1	5649
109093	1	109093	Rars2	arginyl-tRNA synthetase 2, mitochondrial	1867
109129	1	109129	Mmadhc	methylmalonic aciduria (cobalamin deficiency) cblD type, with homocystinuria	1302
109136	-1	109136	Mmaa	methylmalonic aciduria (cobalamin deficiency) type A	3216
109145	1	109145	Gins4	GINS complex subunit 4 (Sld5 homolog)	1364
109169	-1	109169	Igip	IgA inducing protein	1378
109181	-1	109181	Trip11	thyroid hormone receptor interactor 11	6448
109212	1	109212	Pimreg	PICALM interacting mitotic regulator	1466
109232	1	109232	Sccpdh	saccharopine dehydrogenase (putative)	1922
109242	1	109242	Kif24	kinesin family member 24	7713
109246	-1	109246	Tspan9	tetraspanin 9	4051
109267	1	109267	Ssc4d	scavenger receptor cysteine rich family, 4 domains	2794
109299	-1	109299	Tmem250-ps	transmembrane protein 250, pseudogene	2683
109305	1	109305	Orai1	ORAI calcium release-activated calcium modulator 1	1871
109344	-1	109344	E130215H24Rik	RIKEN cDNA E130215H24 gene	936
109346	-1	109346	Ankrd39	ankyrin repeat domain 39	2015
109620	1	109620	Dsp	desmoplakin	9592
109660	-1	109660	Ctrl	chymotrypsin-like	888
109697	-1	109697	Cpa1	carboxypeptidase A1, pancreatic	1578
109711	-1	109711	Actn1	actinin, alpha 1	4074
109901	-1	109901	Cela1	chymotrypsin-like elastase family, member 1	1334
109934	-1	109934	Abr	active BCR-related gene	7943
109959	-1	109959	Amy2a5	amylase 2a5	1632
109978	-1	109978	Art4	ADP-ribosyltransferase 4	2384
110033	1	110033	Kif22	kinesin family member 22	2064
110052	1	110052	Dek	DEK oncogene (DNA binding)	2697
110074	1	110074	Dut	deoxyuridine triphosphatase	2512
110109	1	110109	Nop2	NOP2 nucleolar protein	2623
110196	1	110196	Fdps	farnesyl diphosphate synthetase	1461
110197	1	110197	Dgkg	diacylglycerol kinase, gamma	5505
110208	1	110208	Pgd	phosphogluconate dehydrogenase	2224
110257	-1	110257	Hba-a2	hemoglobin alpha, adult chain 2	1132
110265	-1	110265	Msra	methionine sulfoxide reductase A	4096
110355	-1	110355	Grk2	G protein-coupled receptor kinase 2	3821
110379	1	110379	Sec13	SEC13 homolog, nuclear pore and COPII coat complex component	1301
110454	1	110454	Ly6a	lymphocyte antigen 6 complex, locus A	1002
110460	1	110460	Acat2	acetyl-Coenzyme A acetyltransferase 2	2264
110524	-1	110524	Dgkq	diacylglycerol kinase, theta	5216
110532	1	110532	Adarb1	adenosine deaminase, RNA-specific, B1	8022
110557	-1	110557	H2-Q6	histocompatibility 2, Q region locus 6	1992
110593	-1	110593	Prdm2	PR domain containing 2, with ZNF domain	11549
110611	1	110611	Hdlbp	high density lipoprotein (HDL) binding protein	7278
110695	1	110695	Aldh7a1	aldehyde dehydrogenase family 7, member A1	3199
110749	1	110749	Chaf1b	chromatin assembly factor 1, subunit B (p60)	3909
110750	1	110750	Cse1l	chromosome segregation 1-like (S. cerevisiae)	3849
110826	1	110826	Etfb	electron transferring flavoprotein, beta polypeptide	904
110842	1	110842	Etfa	electron transferring flavoprotein, alpha polypeptide	1464
110880	-1	110880	Scn4a	sodium channel, voltage-gated, type IV, alpha	6598
110911	-1	110911	Cds2	CDP-diacylglycerol synthase (phosphatidate cytidylyltransferase) 2	8985
110956	1	110956	D17H6S56E-5	DNA segment, Chr 17, human D6S56E 5	3538
110958	1	110958	M1ap	meiosis 1 associated protein	2051
110959	1	110959	Nudt19	nudix (nucleoside diphosphate linked moiety X)-type motif 19	1922
110960	1	110960	Tars	threonyl-tRNA synthetase	2636
110962	-1	110962	Mbd6	methyl-CpG binding domain protein 6	4046
111175	1	111175	Pecr	peroxisomal trans-2-enoyl-CoA reductase	1510
112405	1	112405	Egln1	egl-9 family hypoxia-inducible factor 1	3524
112407	1	112407	Egln3	egl-9 family hypoxia-inducible factor 3	2676
112418	-1	112418	1700102P08Rik	RIKEN cDNA 1700102P08 gene	1098
112419	-1	112419	Ifit1bl2	interferon induced protein with tetratricopeptide repeats 1B like 2	3365
11303	-1	11303	Abca1	ATP-binding cassette, sub-family A (ABC1), member 1	10260
11305	-1	11305	Abca2	ATP-binding cassette, sub-family A (ABC1), member 2	8061
11307	-1	11307	Abcg1	ATP binding cassette subfamily G member 1	6274
11352	-1	11352	Abl2	v-abl Abelson murine leukemia viral oncogene 2 (arg, Abelson-related gene)	10714
11363	1	11363	Acadl	acyl-Coenzyme A dehydrogenase, long-chain	1948
113868	-1	113868	Acaa1a	acetyl-Coenzyme A acyltransferase 1A	1758
11421	-1	11421	Ace	angiotensin I converting enzyme (peptidyl-dipeptidase A) 1	5287
114230	1	114230	Aipl1	aryl hydrocarbon receptor-interacting protein-like 1	1570
114255	-1	114255	Dok4	docking protein 4	2693
11426	-1	11426	Macf1	microtubule-actin crosslinking factor 1	25369
11428	1	11428	Aco1	aconitase 1	4319
11431	1	11431	Acp1	acid phosphatase 1, soluble	3221
11433	-1	11433	Acp5	acid phosphatase 5, tartrate resistant	1616
11444	-1	11444	Chrnb2	cholinergic receptor, nicotinic, beta polypeptide 2 (neuronal)	5384
11448	-1	11448	Chrne	cholinergic receptor, nicotinic, epsilon polypeptide	1591
114602	-1	114602	Zmynd10	zinc finger, MYND domain containing 10	1753
114642	-1	114642	Brdt	bromodomain, testis-specific	5025
114643	-1	114643	Oas1c	2'-5' oligoadenylate synthetase 1C	2286
114644	1	114644	Slc13a3	solute carrier family 13 (sodium-dependent dicarboxylate transporter), member 3	4613
114663	1	114663	Impa2	inositol (myo)-1(or 4)-monophosphatase 2	1386
114664	-1	114664	Hsd17b11	hydroxysteroid (17-beta) dehydrogenase 11	3139
114674	-1	114674	Gtf2ird2	GTF2I repeat domain containing 2	5578
114715	1	114715	Spred1	sprouty protein with EVH-1 domain 1, related sequence	7084
11472	-1	11472	Actn2	actinin alpha 2	3665
114741	1	114741	Supt16	suppressor of Ty 16	4491
11477	1	11477	Acvr1	activin A receptor, type 1	3298
11479	-1	11479	Acvr1b	activin A receptor, type 1B	3277
11480	-1	11480	Acvr2a	activin receptor IIA	5872
11482	-1	11482	Acvrl1	activin A receptor, type II-like 1	3788
114874	-1	114874	Ddhd1	DDHD domain containing 1	5581
11492	-1	11492	Adam19	a disintegrin and metallopeptidase domain 19 (meltrin beta)	6447
11498	-1	11498	Adam4	a disintegrin and metallopeptidase domain 4	2330
11512	-1	11512	Adcy6	adenylate cyclase 6	6417
11513	-1	11513	Adcy7	adenylate cyclase 7	6330
11518	-1	11518	Add1	adducin 1 (alpha)	4134
11519	-1	11519	Add2	adducin 2 (beta)	10057
11520	1	11520	Plin2	perilipin 2	1887
11522	-1	11522	Adh1	alcohol dehydrogenase 1 (class I)	1334
11535	1	11535	Adm	adrenomedullin	1381
11541	1	11541	Adora2b	adenosine A2b receptor	1844
11555	-1	11555	Adrb2	adrenergic receptor, beta 2	2269
11564	1	11564	Adsl	adenylosuccinate lyase	3712
11567	-1	11567	Avil	advillin	3033
11569	1	11569	Aebp2	AE binding protein 2	6743
11576	-1	11576	Afp	alpha fetoprotein	2086
11596	-1	11596	Ager	advanced glycosylation end product-specific receptor	1784
11615	1	11615	Gm4737	predicted gene 4737	2087
11629	-1	11629	Aif1	allograft inflammatory factor 1	896
11637	1	11637	Ak2	adenylate kinase 2	2275
11639	1	11639	Ak4	adenylate kinase 4	5162
11640	1	11640	Akap1	A kinase (PRKA) anchor protein 1	4027
11647	1	11647	Alpl	alkaline phosphatase, liver/bone/kidney	2983
11655	1	11655	Alas1	aminolevulinic acid synthase 1	3259
11656	-1	11656	Alas2	aminolevulinic acid synthase 2, erythroid	1979
11658	1	11658	Alcam	activated leukocyte cell adhesion molecule	5254
11666	-1	11666	Abcd1	ATP-binding cassette, sub-family D (ALD), member 1	3945
11671	-1	11671	Aldh3a2	aldehyde dehydrogenase family 3, subfamily A2	3193
11674	1	11674	Aldoa	aldolase A, fructose-bisphosphate	1824
11676	1	11676	Aldoc	aldolase C, fructose-bisphosphate	2870
116848	-1	116848	Baz2a	bromodomain adjacent to zinc finger domain, 2A	9823
116871	-1	116871	Mta3	metastasis associated 3	4587
11690	-1	11690	Alox5ap	arachidonate 5-lipoxygenase activating protein	854
116904	-1	116904	Alpk3	alpha-kinase 3	6462
116914	1	116914	Slc19a2	solute carrier family 19 (thiamine transporter), member 2	3571
11692	1	11692	Gfer	growth factor, augmenter of liver regeneration	1775
116972	1	116972	Fam57a	family with sequence similarity 57, member A	5025
11702	1	11702	Amd1	S-adenosylmethionine decarboxylase 1	3206
117149	1	117149	Tirap	toll-interleukin 1 receptor (TIR) domain-containing adaptor protein	4868
117160	-1	117160	Ttyh2	tweety family member 2	3456
11717	-1	11717	Ampd3	adenosine monophosphate deaminase 3	4562
11722	-1	11722	Amy1	amylase 1, salivary	2950
11732	-1	11732	Ank	progressive ankylosis	3608
11733	-1	11733	Ank1	ankyrin 1, erythroid	9367
11739	1	11739	Slc25a4	solute carrier family 25 (mitochondrial carrier, adenine nucleotide translocator), member 4	1534
11740	1	11740	Slc25a5	solute carrier family 25 (mitochondrial carrier, adenine nucleotide translocator), member 5	1238
11744	-1	11744	Anxa11	annexin A11	5519
11746	1	11746	Anxa4	annexin A4	3622
11749	-1	11749	Anxa6	annexin A6	3086
11757	1	11757	Prdx3	peroxiredoxin 3	1445
117591	-1	117591	Slc2a9	solute carrier family 2 (facilitated glucose transporter), member 9	3865
11768	-1	11768	Ap1m2	adaptor protein complex AP-1, mu 2 subunit	1738
11769	1	11769	Ap1s1	adaptor protein complex AP-1, sigma 1	1277
11777	1	11777	Ap3s1	adaptor-related protein complex 3, sigma 1 subunit	1561
11789	-1	11789	Apc	APC, WNT signaling pathway regulator	12933
11792	1	11792	Apex1	apurinic/apyrimidinic endonuclease 1	1307
11799	1	11799	Birc5	baculoviral IAP repeat-containing 5	3416
11801	-1	11801	Cd5l	CD5 antigen-like	2037
11816	-1	11816	Apoe	apolipoprotein E	1586
11820	-1	11820	App	amyloid beta (A4) precursor protein	3357
11821	1	11821	Aprt	adenine phosphoribosyl transferase	1218
11826	-1	11826	Aqp1	aquaporin 1	2760
11828	-1	11828	Aqp3	aquaporin 3	1763
11838	-1	11838	Arc	activity regulated cytoskeletal-associated protein	3059
11852	-1	11852	Rhob	ras homolog family member B	2227
11854	1	11854	Rhod	ras homolog family member D	1708
11857	-1	11857	Arhgdib	Rho, GDP dissociation inhibitor (GDI) beta	1414
11861	-1	11861	Arl4a	ADP-ribosylation factor-like 4A	4612
11865	-1	11865	Arntl	aryl hydrocarbon receptor nuclear translocator-like	2979
11871	-1	11871	Art2a	ADP-ribosyltransferase 2a	1257
11872	-1	11872	Art2b	ADP-ribosyltransferase 2b	870
11875	-1	11875	Art5	ADP-ribosyltransferase 5	1901
11877	-1	11877	Arvcf	armadillo repeat gene deleted in velocardiofacial syndrome	5710
11881	-1	11881	Arsb	arylsulfatase B	5988
11883	-1	11883	Arsa	arylsulfatase A	3491
11905	1	11905	Serpinc1	serine (or cysteine) peptidase inhibitor, clade C (antithrombin), member 1	2161
11910	1	11910	Atf3	activating transcription factor 3	2146
11931	-1	11931	Atp1b1	ATPase, Na+/K+ transporting, beta 1 polypeptide	2590
11932	-1	11932	Atp1b2	ATPase, Na+/K+ transporting, beta 2 polypeptide	2959
11933	-1	11933	Atp1b3	ATPase, Na+/K+ transporting, beta 3 polypeptide	1831
11937	-1	11937	Atp2a1	ATPase, Ca++ transporting, cardiac muscle, fast twitch 1	3440
11938	1	11938	Atp2a2	ATPase, Ca++ transporting, cardiac muscle, slow twitch 2	5725
11946	1	11946	Atp5a1	ATP synthase, H+ transporting, mitochondrial F1 complex, alpha subunit 1	2431
11947	1	11947	Atp5b	ATP synthase, H+ transporting mitochondrial F1 complex, beta subunit	1879
11950	1	11950	Atp5f1	ATP synthase, H+ transporting, mitochondrial F0 complex, subunit B1	3871
11951	1	11951	Atp5g1	ATP synthase, H+ transporting, mitochondrial F0 complex, subunit C1 (subunit 9)	868
11957	1	11957	Atp5j	ATP synthase, H+ transporting, mitochondrial F0 complex, subunit F	903
11958	1	11958	Atp5k	ATP synthase, H+ transporting, mitochondrial F1F0 complex, subunit E	292
11964	1	11964	Atp6v1a	ATPase, H+ transporting, lysosomal V1 subunit A	5512
11977	-1	11977	Atp7a	ATPase, Cu++ transporting, alpha polypeptide	8198
11979	1	11979	Atp7b	ATPase, Cu++ transporting, beta polypeptide	4711
11980	-1	11980	Atp8a1	ATPase, aminophospholipid transporter (APLT), class I, type 8A, member 1	9528
11983	1	11983	Atpif1	ATPase inhibitory factor 1	1491
11987	1	11987	Slc7a1	solute carrier family 7 (cationic amino acid transporter, y+ system), member 1	7239
11989	1	11989	Slc7a3	solute carrier family 7 (cationic amino acid transporter, y+ system), member 3	2435
12006	-1	12006	Axin2	axin 2	4293
12013	-1	12013	Bach1	BTB and CNC homology 1, basic leucine zipper transcription factor 1	6170
12018	1	12018	Bak1	BCL2-antagonist/killer 1	2022
12021	1	12021	Bard1	BRCA1 associated RING domain 1	5448
12029	1	12029	Bcl6b	B cell CLL/lymphoma 6, member B	3426
12033	1	12033	Bcap29	B cell receptor associated protein 29	2008
12034	1	12034	Phb2	prohibitin 2	1962
12035	1	12035	Bcat1	branched chain aminotransferase 1, cytosolic	8335
12040	-1	12040	Bckdhb	branched chain ketoacid dehydrogenase E1, beta polypeptide	1606
12045	1	12045	Bcl2a1b	B cell leukemia/lymphoma 2 related protein A1b	764
12046	1	12046	Bcl2a1c	B cell leukemia/lymphoma 2 related protein A1c	444
12047	1	12047	Bcl2a1d	B cell leukemia/lymphoma 2 related protein A1d	796
12048	1	12048	Bcl2l1	BCL2-like 1	4619
12050	1	12050	Bcl2l2	BCL2-like 2	4031
12053	-1	12053	Bcl6	B cell leukemia/lymphoma 6	3285
12054	-1	12054	Bcl7b	B cell CLL/lymphoma 7B	1936
12055	1	12055	Bcl7c	B cell CLL/lymphoma 7C	4675
121022	1	121022	Mrps6	mitochondrial ribosomal protein S6	794
12111	-1	12111	Bgn	biglycan	3416
12142	-1	12142	Prdm1	PR domain containing 1, with ZNF domain	5495
12143	-1	12143	Blk	B lymphoid kinase	2475
12144	1	12144	Blm	Bloom syndrome, RecQ like helicase	5287
12145	-1	12145	Cxcr5	chemokine (C-X-C motif) receptor 5	2634
12153	1	12153	Bmp1	bone morphogenetic protein 1	6004
12166	1	12166	Bmpr1a	bone morphogenetic protein receptor, type 1A	5571
12176	1	12176	Bnip3	BCL2/adenovirus E1B interacting protein 3	1756
12189	1	12189	Brca1	breast cancer 1, early onset	8261
12190	1	12190	Brca2	breast cancer 2, early onset	11792
12192	-1	12192	Zfp36l1	zinc finger protein 36, C3H type-like 1	2984
12193	-1	12193	Zfp36l2	zinc finger protein 36, C3H type-like 2	3533
12211	-1	12211	Birc6	baculoviral IAP repeat-containing 6	21332
12212	-1	12212	Chic1	cysteine-rich hydrophobic domain 1	7401
12215	1	12215	Bsg	basigin	1752
12223	-1	12223	Btc	betacellulin, epidermal growth factor family member	2876
12226	-1	12226	Btg1	B cell translocation gene 1, anti-proliferative	5008
12227	-1	12227	Btg2	B cell translocation gene 2, anti-proliferative	3083
12235	1	12235	Bub1	BUB1, mitotic checkpoint serine/threonine kinase	4848
12236	1	12236	Bub1b	BUB1B, mitotic checkpoint serine/threonine kinase	3669
12237	1	12237	Bub3	BUB3 mitotic checkpoint protein	2055
12258	-1	12258	Serping1	serine (or cysteine) peptidase inhibitor, clade G, member 1	1846
12259	-1	12259	C1qa	complement component 1, q subcomponent, alpha polypeptide	1082
12260	-1	12260	C1qb	complement component 1, q subcomponent, beta polypeptide	1062
12261	1	12261	C1qbp	complement component 1, q subcomponent binding protein	1165
12262	-1	12262	C1qc	complement component 1, q subcomponent, C chain	1054
12263	-1	12263	C2	complement component 2 (within H-2S)	2644
12265	-1	12265	Ciita	class II transactivator	8039
12266	-1	12266	C3	complement component 3	5139
12268	-1	12268	C4b	complement component 4B (Chido blood group)	5539
12274	-1	12274	C6	complement component 6	2856
12286	-1	12286	Cacna1a	calcium channel, voltage-dependent, P/Q type, alpha 1A subunit	9988
12287	1	12287	Cacna1b	calcium channel, voltage-dependent, N type, alpha 1B subunit	9866
12290	-1	12290	Cacna1e	calcium channel, voltage-dependent, R type, alpha 1E subunit	12697
12292	1	12292	Cacna1s	calcium channel, voltage-dependent, L type, alpha 1S subunit	6260
12293	1	12293	Cacna2d1	calcium channel, voltage-dependent, alpha2/delta subunit 1	12749
12295	-1	12295	Cacnb1	calcium channel, voltage-dependent, beta 1 subunit	3848
12296	1	12296	Cacnb2	calcium channel, voltage-dependent, beta 2 subunit	7647
12297	1	12297	Cacnb3	calcium channel, voltage-dependent, beta 3 subunit	3385
12301	1	12301	Cacybp	calcyclin binding protein	2115
12306	1	12306	Anxa2	annexin A2	2587
12316	1	12316	Aspm	abnormal spindle microtubule assembly	11401
12322	-1	12322	Camk2a	calcium/calmodulin-dependent protein kinase II alpha	7355
12323	-1	12323	Camk2b	calcium/calmodulin-dependent protein kinase II, beta	4654
12325	-1	12325	Camk2g	calcium/calmodulin-dependent protein kinase II gamma	3705
12326	-1	12326	Camk4	calcium/calmodulin-dependent protein kinase IV	12331
12330	1	12330	Canx	calnexin	4289
12332	1	12332	Capg	capping protein (actin filament), gelsolin-like	1917
12333	-1	12333	Capn1	calpain 1	3199
12334	-1	12334	Capn2	calpain 2	4672
12335	-1	12335	Capn3	calpain 3	4277
12337	1	12337	Capn5	calpain 5	4565
12346	-1	12346	Car1	carbonic anhydrase 1	1248
12348	-1	12348	Car11	carbonic anhydrase 11	1440
12349	-1	12349	Car2	carbonic anhydrase 2	1790
12353	-1	12353	Car6	carbonic anhydrase 6	1558
12363	1	12363	Casp4	caspase 4, apoptosis-related cysteine peptidase	3192
12367	1	12367	Casp3	caspase 3	3366
12385	1	12385	Ctnna1	catenin (cadherin associated protein), alpha 1	4168
12394	-1	12394	Runx1	runt related transcription factor 1	9365
12398	-1	12398	Cbfa2t3	CBFA2/RUNX1 translocation partner 3	7964
12402	-1	12402	Cbl	Casitas B-lineage lymphoma	5083
12408	-1	12408	Cbr1	carbonyl reductase 1	1081
12411	1	12411	Cbs	cystathionine beta-synthase	2503
12418	-1	12418	Cbx4	chromobox 4	5301
12419	1	12419	Cbx5	chromobox 5	8986
12421	-1	12421	Rb1cc1	RB1-inducible coiled-coil 1	10194
12428	1	12428	Ccna2	cyclin A2	2811
12442	1	12442	Ccnb2	cyclin B2	1541
12443	-1	12443	Ccnd1	cyclin D1	4614
12447	1	12447	Ccne1	cyclin E1	1956
12448	1	12448	Ccne2	cyclin E2	3220
12449	1	12449	Ccnf	cyclin F	4900
12461	1	12461	Cct2	chaperonin containing Tcp1, subunit 2 (beta)	1962
12462	1	12462	Cct3	chaperonin containing Tcp1, subunit 3 (gamma)	3103
12464	1	12464	Cct4	chaperonin containing Tcp1, subunit 4 (delta)	2670
12465	1	12465	Cct5	chaperonin containing Tcp1, subunit 5 (epsilon)	1769
12466	1	12466	Cct6a	chaperonin containing Tcp1, subunit 6a (zeta)	2167
12468	1	12468	Cct7	chaperonin containing Tcp1, subunit 7 (eta)	2452
12469	1	12469	Cct8	chaperonin containing Tcp1, subunit 8 (theta)	2391
12475	-1	12475	Cd14	CD14 antigen	1661
12476	-1	12476	Cd151	CD151 antigen	2012
12477	1	12477	Ctla4	cytotoxic T-lymphocyte-associated protein 4	1933
12478	-1	12478	Cd19	CD19 antigen	2932
12479	-1	12479	Cd1d1	CD1d1 antigen	1843
12480	-1	12480	Cd1d2	CD1d2 antigen	1244
12482	-1	12482	Ms4a1	membrane-spanning 4-domains, subfamily A, member 1	4403
12483	-1	12483	Cd22	CD22 antigen	4873
12491	-1	12491	Cd36	CD36 molecule	3927
12493	-1	12493	Cd37	CD37 antigen	2726
12494	-1	12494	Cd38	CD38 antigen	2995
12495	-1	12495	Entpd1	ectonucleoside triphosphate diphosphohydrolase 1	4379
12497	-1	12497	Entpd6	ectonucleoside triphosphate diphosphohydrolase 6	4661
12499	-1	12499	Entpd5	ectonucleoside triphosphate diphosphohydrolase 5	5100
12501	-1	12501	Cd3e	CD3 antigen, epsilon polypeptide	1436
12502	-1	12502	Cd3g	CD3 antigen, gamma polypeptide	1023
12503	-1	12503	Cd247	CD247 antigen	4604
12505	1	12505	Cd44	CD44 antigen	6775
12514	-1	12514	Cd68	CD68 antigen	1247
12516	-1	12516	Cd7	CD7 antigen	1040
12517	-1	12517	Cd72	CD72 antigen	1503
12518	-1	12518	Cd79a	CD79A antigen (immunoglobulin-associated alpha)	1327
12519	1	12519	Cd80	CD80 antigen	3106
12520	1	12520	Cd81	CD81 antigen	1518
12521	1	12521	Cd82	CD82 antigen	2077
12522	1	12522	Cd83	CD83 antigen	2236
12523	-1	12523	Cd84	CD84 antigen	6253
12524	-1	12524	Cd86	CD86 antigen	2539
12525	-1	12525	Cd8a	CD8 antigen, alpha chain	3130
12526	-1	12526	Cd8b1	CD8 antigen, beta chain 1	1416
12530	1	12530	Cdc25a	cell division cycle 25A	4704
12532	1	12532	Cdc25c	cell division cycle 25C	2148
12534	1	12534	Cdk1	cyclin-dependent kinase 1	2860
12544	1	12544	Cdc45	cell division cycle 45	2143
12549	-1	12549	Arhgap31	Rho GTPase activating protein 31	8371
12550	-1	12550	Cdh1	cadherin 1	4413
12555	1	12555	Cdh15	cadherin 15	2843
12562	-1	12562	Cdh5	cadherin 5	3986
12567	1	12567	Cdk4	cyclin-dependent kinase 4	1346
12568	-1	12568	Cdk5	cyclin-dependent kinase 5	2058
12571	1	12571	Cdk6	cyclin-dependent kinase 6	2742
12575	1	12575	Cdkn1a	cyclin-dependent kinase inhibitor 1A (P21)	2216
12576	-1	12576	Cdkn1b	cyclin-dependent kinase inhibitor 1B	4380
12580	1	12580	Cdkn2c	cyclin dependent kinase inhibitor 2C	2253
12583	-1	12583	Cdo1	cysteine dioxygenase 1, cytosolic	1530
12606	-1	12606	Cebpa	CCAAT/enhancer binding protein (C/EBP), alpha	2639
12613	-1	12613	Cel	carboxyl ester lipase	2038
12614	-1	12614	Celsr1	cadherin, EGF LAG seven-pass G-type receptor 1	11083
12615	1	12615	Cenpa	centromere protein A	1581
12617	1	12617	Cenpc1	centromere protein C1	4594
12642	1	12642	Ch25h	cholesterol 25-hydroxylase	1352
12649	1	12649	Chek1	checkpoint kinase 1	3893
12651	-1	12651	Chkb	choline kinase beta	2141
12655	-1	12655	Chil3	chitinase-like 3	1539
12659	-1	12659	Ovgp1	oviductal glycoprotein 1	2525
12661	-1	12661	Chl1	cell adhesion molecule L1-like	8970
12671	-1	12671	Chrm3	cholinergic receptor, muscarinic 3, cardiac	3168
12672	1	12672	Chrm4	cholinergic receptor, muscarinic 4	2768
12695	-1	12695	Patj	PATJ, crumbs cell polarity complex component	14229
12696	-1	12696	Cirbp	cold inducible RNA binding protein	1256
12700	1	12700	Cish	cytokine inducible SH2-containing protein	2161
12702	-1	12702	Socs3	suppressor of cytokine signaling 3	2724
12704	1	12704	Cit	citron	8545
12709	1	12709	Ckb	creatine kinase, brain	1478
12716	1	12716	Ckmt1	creatine kinase, mitochondrial 1, ubiquitous	1970
12721	-1	12721	Coro1a	coronin, actin binding protein 1A	1911
12724	-1	12724	Clcn2	chloride channel, voltage-sensitive 2	4503
12727	-1	12727	Clcn4	chloride channel, voltage-sensitive 4	6507
12728	1	12728	Clcn5	chloride channel, voltage-sensitive 5	4353
12729	1	12729	Clns1a	chloride channel, nucleotide-sensitive, 1A	3395
12747	-1	12747	Clk1	CDC-like kinase 1	3088
12750	-1	12750	Clk4	CDC like kinase 4	3460
12752	-1	12752	Cln3	ceroid lipofuscinosis, neuronal 3, juvenile (Batten, Spielmeyer-Vogt disease)	3455
12753	-1	12753	Clock	circadian locomotor output cycles kaput	10574
12759	-1	12759	Clu	clusterin	1808
12763	-1	12763	Cmah	cytidine monophospho-N-acetylneuraminic acid hydroxylase	10883
12765	-1	12765	Cxcr2	chemokine (C-X-C motif) receptor 2	3043
12767	-1	12767	Cxcr4	chemokine (C-X-C motif) receptor 4	1814
12768	-1	12768	Ccr1	chemokine (C-C motif) receptor 1	2831
12769	-1	12769	Ccr9	chemokine (C-C motif) receptor 9	5004
12771	-1	12771	Ccr3	chemokine (C-C motif) receptor 3	3273
12772	-1	12772	Ccr2	chemokine (C-C motif) receptor 2	4365
12773	1	12773	Ccr4	chemokine (C-C motif) receptor 4	2787
12774	1	12774	Ccr5	chemokine (C-C motif) receptor 5	2926
12776	1	12776	Ccr8	chemokine (C-C motif) receptor 8	1156
12788	-1	12788	Cnga1	cyclic nucleotide gated channel alpha 1	4504
12793	1	12793	Cnih1	cornichon family AMPA receptor auxiliary protein 1	1483
12796	-1	12796	Camp	cathelicidin antimicrobial peptide	599
12798	-1	12798	Cnn2	calponin 2	1782
12799	-1	12799	Cnp	2',3'-cyclic nucleotide 3' phosphodiesterase	2678
12802	-1	12802	Cnr2	cannabinoid receptor 2 (macrophage)	4337
12807	-1	12807	Hps3	HPS3, biogenesis of lysosomal organelles complex 2 subunit 1	8434
12810	-1	12810	Coch	cochlin	2683
12815	-1	12815	Col11a2	collagen, type XI, alpha 2	6209
12818	-1	12818	Col14a1	collagen, type XIV, alpha 1	7008
12819	1	12819	Col15a1	collagen, type XV, alpha 1	5319
12825	-1	12825	Col3a1	collagen, type III, alpha 1	7988
12826	-1	12826	Col4a1	collagen, type IV, alpha 1	6632
12827	-1	12827	Col4a2	collagen, type IV, alpha 2	6426
12836	-1	12836	Col7a1	collagen, type VII, alpha 1	9198
12841	-1	12841	Col9a3	collagen, type IX, alpha 3	3444
12843	-1	12843	Col1a2	collagen, type I, alpha 2	10007
12845	-1	12845	Comp	cartilage oligomeric matrix protein	2426
12846	1	12846	Comt	catechol-O-methyltransferase	2400
12848	1	12848	Cops2	COP9 signalosome subunit 2	3364
12850	1	12850	Coq7	demethyl-Q 7	4003
12856	1	12856	Cox17	cytochrome c oxidase assembly protein 17, copper chaperone	436
12858	1	12858	Cox5a	cytochrome c oxidase subunit 5A	692
12859	1	12859	Cox5b	cytochrome c oxidase subunit 5B	569
12864	1	12864	Cox6c	cytochrome c oxidase subunit 6C	503
12865	1	12865	Cox7a1	cytochrome c oxidase subunit 7A1	366
12866	1	12866	Cox7a2	cytochrome c oxidase subunit 7A2	754
12867	1	12867	Cox7c	cytochrome c oxidase subunit 7C	449
12868	1	12868	Cox8a	cytochrome c oxidase subunit 8A	545
12874	1	12874	Cpd	carboxypeptidase D	9528
12891	1	12891	Cpne6	copine VI	2289
12892	1	12892	Cpox	coproporphyrinogen oxidase	4939
12894	-1	12894	Cpt1a	carnitine palmitoyltransferase 1a, liver	4301
12902	-1	12902	Cr2	complement receptor 2	6244
12904	1	12904	Crabp2	cellular retinoic acid binding protein II	900
12914	-1	12914	Crebbp	CREB binding protein	7537
12916	1	12916	Crem	cAMP responsive element modulator	4525
12927	1	12927	Bcar1	breast cancer anti-estrogen resistance 1	4599
12945	-1	12945	Dmbt1	deleted in malignant brain tumors 1	6276
12953	-1	12953	Cry2	cryptochrome 2 (photolyase-like)	6115
12972	1	12972	Cryz	crystallin, zeta	2606
12978	-1	12978	Csf1r	colony stimulating factor 1 receptor	5510
12981	1	12981	Csf2	colony stimulating factor 2 (granulocyte-macrophage)	1033
12983	-1	12983	Csf2rb	colony stimulating factor 2 receptor, beta, low-affinity (granulocyte-macrophage)	5351
12984	-1	12984	Csf2rb2	colony stimulating factor 2 receptor, beta 2, low-affinity (granulocyte-macrophage)	4739
12986	-1	12986	Csf3r	colony stimulating factor 3 receptor (granulocyte)	4047
13007	1	13007	Csrp1	cysteine and glycine-rich protein 1	1770
13008	1	13008	Csrp2	cysteine and glycine-rich protein 2	889
13011	1	13011	Cst7	cystatin F (leukocystatin)	986
13025	-1	13025	Ctla2b	cytotoxic T lymphocyte-associated protein 2 beta	1147
13033	-1	13033	Ctsd	cathepsin D	1954
13034	-1	13034	Ctse	cathepsin E	6057
13036	-1	13036	Ctsh	cathepsin H	1623
13038	-1	13038	Ctsk	cathepsin K	1583
13040	-1	13040	Ctss	cathepsin S	1360
13041	-1	13041	Ctsw	cathepsin W	1232
13043	1	13043	Cttn	cortactin	3223
13047	-1	13047	Cux1	cut-like homeobox 1	16496
13051	-1	13051	Cx3cr1	chemokine (C-X3-C motif) receptor 1	3753
13056	1	13056	Cyb561	cytochrome b-561	2753
13058	-1	13058	Cybb	cytochrome b-245, beta polypeptide	5406
13063	1	13063	Cycs	cytochrome c, somatic	3059
13070	1	13070	Cyp11a1	cytochrome P450, family 11, subfamily a, polypeptide 1	1774
13121	1	13121	Cyp51	cytochrome P450, family 51	4353
13136	-1	13136	Cd55	CD55 molecule, decay accelerating factor for complement	4382
13137	-1	13137	Cd55b	CD55 molecule, decay accelerating factor for complement B	1324
13139	-1	13139	Dgka	diacylglycerol kinase, alpha	2890
13167	1	13167	Dbi	diazepam binding inhibitor	745
13170	-1	13170	Dbp	D site albumin promoter binding protein	1678
13175	1	13175	Dclk1	doublecortin-like kinase 1	13651
13179	-1	13179	Dcn	decorin	2084
13194	1	13194	Ddb1	damage specific DNA binding protein 1	4163
13197	-1	13197	Gadd45a	growth arrest and DNA-damage-inducible 45 alpha	1224
13199	1	13199	Ddn	dendrin	3740
13202	1	13202	Ddt	D-dopachrome tautomerase	609
13207	-1	13207	Ddx5	DEAD (Asp-Glu-Ala-Asp) box polypeptide 5	4210
13340	1	13340	Slc29a2	solute carrier family 29 (nucleoside transporters), member 2	2473
13353	1	13353	Dgcr6	DiGeorge syndrome critical region gene 6	1760
13358	1	13358	Slc25a1	solute carrier family 25 (mitochondrial carrier, citrate transporter), member 1	1678
13361	1	13361	Dhfr	dihydrofolate reductase	5290
13371	1	13371	Dio2	deiodinase, iodothyronine, type II	5815
13382	1	13382	Dld	dihydrolipoamide dehydrogenase	2277
13401	1	13401	Dmwd	dystrophia myotonica-containing WD repeat motif	2608
13411	-1	13411	Dnah11	dynein, axonemal, heavy chain 11	14216
13417	-1	13417	Dnah8	dynein, axonemal, heavy chain 8	16403
13419	-1	13419	Dnase1	deoxyribonuclease I	1493
13421	-1	13421	Dnase1l3	deoxyribonuclease 1-like 3	3699
13424	-1	13424	Dync1h1	dynein cytoplasmic 1 heavy chain 1	14398
13429	1	13429	Dnm1	dynamin 1	4817
13430	-1	13430	Dnm2	dynamin 2	4109
13433	1	13433	Dnmt1	DNA methyltransferase (cytosine-5) 1	7006
13445	1	13445	Cdk2ap1	CDK2 (cyclin-dependent kinase 2)-associated protein 1	1250
13478	1	13478	Dpagt1	dolichyl-phosphate (UDP-N-acetylglucosamine) acetylglucosaminephosphotransferase 1 (GlcNAc-1-P transferase)	2654
13494	1	13494	Drg1	developmentally regulated GTP binding protein 1	3100
13495	1	13495	Drg2	developmentally regulated GTP binding protein 2	1713
13496	1	13496	Arid3a	AT rich interactive domain 3A (BRIGHT-like)	5455
13497	1	13497	Drp2	dystrophin related protein 2	7446
13498	-1	13498	Atn1	atrophin 1	4924
13518	-1	13518	Dst	dystonin	33075
13537	-1	13537	Dusp2	dual specificity phosphatase 2	1618
13542	-1	13542	Dvl1	dishevelled segment polarity protein 1	4995
13544	-1	13544	Dvl3	dishevelled segment polarity protein 3	5338
13548	-1	13548	Dyrk1a	dual-specificity tyrosine-(Y)-phosphorylation regulated kinase 1a	8014
13549	-1	13549	Dyrk1b	dual-specificity tyrosine-(Y)-phosphorylation regulated kinase 1b	2635
13555	1	13555	E2f1	E2F transcription factor 1	3099
13557	1	13557	E2f3	E2F transcription factor 3	5361
13560	-1	13560	E4f1	E4F transcription factor 1	2890
13587	-1	13587	Ear2	eosinophil-associated, ribonuclease A family, member 2	716
13591	-1	13591	Ebf1	early B cell factor 1	8676
13601	-1	13601	Ecm1	extracellular matrix protein 1	1899
13603	1	13603	Opn3	opsin 3	1769
13605	1	13605	Ect2	ect2 oncogene	4280
13609	-1	13609	S1pr1	sphingosine-1-phosphate receptor 1	3029
13611	-1	13611	S1pr4	sphingosine-1-phosphate receptor 4	2393
13614	1	13614	Edn1	endothelin 1	2344
13626	1	13626	Eed	embryonic ectoderm development	2060
13649	1	13649	Egfr	epidermal growth factor receptor	6601
13650	1	13650	Rhbdf1	rhomboid 5 homolog 1	2939
13654	1	13654	Egr2	early growth response 2	2965
13656	1	13656	Egr4	early growth response 4	2100
13660	1	13660	Ehd1	EH-domain containing 1	3182
13664	1	13664	Eif1a	eukaryotic translation initiation factor 1A	2879
13665	1	13665	Eif2s1	eukaryotic translation initiation factor 2, subunit 1 alpha	3152
13680	1	13680	Ddx19a	DEAD (Asp-Glu-Ala-Asp) box polypeptide 19a	2575
13681	1	13681	Eif4a1	eukaryotic translation initiation factor 4A1	1880
13682	-1	13682	Eif4a2	eukaryotic translation initiation factor 4A2	3185
13684	1	13684	Eif4e	eukaryotic translation initiation factor 4E	2882
13685	1	13685	Eif4ebp1	eukaryotic translation initiation factor 4E binding protein 1	981
13706	-1	13706	Cela2a	chymotrypsin-like elastase family, member 2A	912
13709	-1	13709	Elf1	E74-like factor 1	4329
13714	-1	13714	Elk4	ELK4, member of ETS oncogene family	4927
13722	1	13722	Aimp1	aminoacyl tRNA synthetase complex-interacting multifunctional protein 1	1122
13723	-1	13723	Emb	embigin	2622
13728	-1	13728	Mark2	MAP/microtubule affinity regulating kinase 2	5101
13732	-1	13732	Emp3	epithelial membrane protein 3	972
13733	-1	13733	Adgre1	adhesion G protein-coupled receptor E1	3245
13800	1	13800	Enah	ENAH actin regulator	12630
13801	1	13801	Enam	enamelin	5490
13803	-1	13803	Enc1	ectodermal-neural cortex 1	4743
13806	1	13806	Eno1	enolase 1, alpha non-neuron	3304
13807	1	13807	Eno2	enolase 2, gamma neuronal	2797
13808	1	13808	Eno3	enolase 3, beta muscle	1604
13809	1	13809	Enpep	glutamyl aminopeptidase	4444
13819	-1	13819	Epas1	endothelial PAS domain protein 1	5352
13821	-1	13821	Epb41l1	erythrocyte membrane protein band 4.1 like 1	10703
13823	-1	13823	Epb41l3	erythrocyte membrane protein band 4.1 like 3	6832
13831	-1	13831	Epc1	enhancer of polycomb homolog 1	4651
13836	1	13836	Epha2	Eph receptor A2	3932
13844	1	13844	Ephb2	Eph receptor B2	6424
13848	-1	13848	Ephb6	Eph receptor B6	3760
13855	1	13855	Epn2	epsin 2	4489
13857	1	13857	Epor	erythropoietin receptor	1897
13876	1	13876	Erg	ETS transcription factor	3466
13877	1	13877	Erh	ERH mRNA splicing and mitosis factor	812
13982	-1	13982	Esr1	estrogen receptor 1 (alpha)	9546
13992	1	13992	Khdrbs3	KH domain containing, RNA binding, signal transduction associated 3	3162
13996	-1	13996	Etohd2	ethanol decreased 2	3135
13999	-1	13999	Gm14288	predicted gene 14288	11440
14011	1	14011	Etv6	ets variant 6	5696
14012	1	14012	Mpzl2	myelin protein zero-like 2	3216
14025	-1	14025	Bcl11a	B cell CLL/lymphoma 11A (zinc finger protein)	12273
14026	-1	14026	Evl	Ena-vasodilator stimulated phosphoprotein	2807
140476	-1	140476	Strc	stereocilin	6181
140481	-1	140481	Man2a2	mannosidase 2, alpha 2	9712
140488	1	140488	Igf2bp3	insulin-like growth factor 2 mRNA binding protein 3	4538
14049	-1	14049	Eya2	EYA transcriptional coactivator and phosphatase 2	2758
140497	-1	140497	Cd300c2	CD300C molecule 2	1227
14055	-1	14055	Ezh1	enhancer of zeste 1 polycomb repressive complex 2 subunit	6083
14056	1	14056	Ezh2	enhancer of zeste 2 polycomb repressive complex 2 subunit	2822
14057	1	14057	Sfxn1	sideroflexin 1	2810
140577	1	140577	Ankrd6	ankyrin repeat domain 6	5974
14063	-1	14063	F2rl1	coagulation factor II (thrombin) receptor-like 1	2756
14066	1	14066	F3	coagulation factor III	1876
140703	-1	140703	Emid1	EMI domain containing 1	2160
140721	1	140721	Caskin2	CASK-interacting protein 2	4722
140742	-1	140742	Sesn1	sestrin 1	3339
140765	1	140765	Tmprss3	transmembrane protease, serine 3	2882
140810	-1	140810	Ttbk2	tau tubulin kinase 2	11268
140859	1	140859	Nek8	NIMA (never in mitosis gene a)-related expressed kinase 8	2800
14087	1	14087	Fanca	Fanconi anemia, complementation group A	5246
14089	1	14089	Fap	fibroblast activation protein	4260
140919	1	140919	Slc17a6	solute carrier family 17 (sodium-dependent inorganic phosphate cotransporter), member 6	4320
14104	1	14104	Fasn	fatty acid synthase	9938
14113	1	14113	Fbl	fibrillarin	1159
14114	1	14114	Fbln1	fibulin 1	3795
14115	1	14115	Fbln2	fibulin 2	4554
14118	1	14118	Fbn1	fibrillin 1	14162
14119	1	14119	Fbn2	fibrillin 2	10787
14123	-1	14123	Fbrs	fibrosin	2661
14127	-1	14127	Fcer1g	Fc receptor, IgE, high affinity I, gamma polypeptide	658
14128	-1	14128	Fcer2a	Fc receptor, IgE, low affinity II, alpha polypeptide	3091
14129	-1	14129	Fcgr1	Fc receptor, IgG, high affinity I	2601
14130	-1	14130	Fcgr2b	Fc receptor, IgG, low affinity IIb	2915
14131	-1	14131	Fcgr3	Fc receptor, IgG, low affinity III	1457
14132	-1	14132	Fcgrt	Fc receptor, IgG, alpha chain transporter	1900
14133	-1	14133	Fcna	ficolin A	1332
14137	1	14137	Fdft1	farnesyl diphosphate farnesyl transferase 1	3697
14155	1	14155	Fem1b	feminization 1 homolog b (C. elegans)	6490
14156	1	14156	Fen1	flap structure specific endonuclease 1	2222
14159	-1	14159	Fes	feline sarcoma oncogene	2811
14163	1	14163	Fgd1	FYVE, RhoGEF and PH domain containing 1	4166
14166	1	14166	Fgf11	fibroblast growth factor 11	2618
14173	1	14173	Fgf2	fibroblast growth factor 2	890
14184	1	14184	Fgfr3	fibroblast growth factor receptor 3	4399
14187	1	14187	Akr1b8	aldo-keto reductase family 1, member B8	1304
14191	-1	14191	Fgr	FGR proto-oncogene, Src family tyrosine kinase	3342
14194	1	14194	Fh1	fumarate hydratase 1	1632
14198	1	14198	Fhit	fragile histidine triad gene	1143
14200	1	14200	Fhl2	four and a half LIM domains 2	1677
14201	1	14201	Fhl3	four and a half LIM domains 3	1685
14211	1	14211	Smc2	structural maintenance of chromosomes 2	6635
14218	-1	14218	Sh3pxd2a	SH3 and PX domains 2A	11049
14221	1	14221	Fjx1	four jointed box 1	2427
14225	1	14225	Fkbp1a	FK506 binding protein 1a	3469
14227	1	14227	Fkbp2	FK506 binding protein 2	665
14228	1	14228	Fkbp4	FK506 binding protein 4	2167
14235	1	14235	Foxm1	forkhead box M1	4365
14247	-1	14247	Fli1	Friend leukemia integration 1	3175
14255	-1	14255	Flt3	FMS-like tyrosine kinase 3	3656
14256	-1	14256	Flt3l	FMS-like tyrosine kinase 3 ligand	1468
14263	-1	14263	Fmo5	flavin containing monooxygenase 5	5319
14268	-1	14268	Fn1	fibronectin 1	10490
142688	-1	142688	Asb13	ankyrin repeat and SOCS box-containing 13	2410
14281	-1	14281	Fos	FBJ osteosarcoma oncogene	2094
14282	-1	14282	Fosb	FBJ osteosarcoma oncogene B	3776
14283	1	14283	Fosl1	fos-like antigen 1	1705
14296	-1	14296	Frat1	frequently rearranged in advanced T cell lymphomas	2614
14297	1	14297	Fxn	frataxin	1138
142980	-1	142980	Tlr3	toll-like receptor 3	4408
14299	1	14299	Ncs1	neuronal calcium sensor 1	4035
14319	-1	14319	Fth1	ferritin heavy polypeptide 1	1511
14345	1	14345	Fut4	fucosyltransferase 4	3664
14347	1	14347	Fut7	fucosyltransferase 7	2073
14349	-1	14349	Fv1	Friend virus susceptibility 1	1380
14357	-1	14357	Dtx1	deltex 1, E3 ubiquitin ligase	4006
14369	1	14369	Fzd7	frizzled class receptor 7	4809
14371	1	14371	Fzd9	frizzled class receptor 9	2110
14373	-1	14373	G0s2	G0/G1 switch gene 2	843
14375	1	14375	Xrcc6	X-ray repair complementing defective repair in Chinese hamster cells 6	3295
14380	1	14380	G6pd2	glucose-6-phosphate dehydrogenase 2	1635
14381	1	14381	G6pdx	glucose-6-phosphate dehydrogenase X-linked	2616
14385	1	14385	Slc37a4	solute carrier family 37 (glucose-6-phosphate transporter), member 4	2505
14409	-1	14409	Gabrr2	gamma-aminobutyric acid (GABA) C receptor, subunit rho 2	1820
14425	1	14425	Galnt3	polypeptide N-acetylgalactosaminyltransferase 3	3684
14426	-1	14426	Galnt4	polypeptide N-acetylgalactosaminyltransferase 4	5113
14430	-1	14430	Galt	galactose-1-phosphate uridyl transferase	2525
14450	1	14450	Gart	phosphoribosylglycinamide formyltransferase	3797
14453	1	14453	Gas2	growth arrest specific 2	4053
14457	-1	14457	Gas7	growth arrest specific 7	7654
14460	-1	14460	Gata1	GATA binding protein 1	1997
14461	-1	14461	Gata2	GATA binding protein 2	3353
14462	-1	14462	Gata3	GATA binding protein 3	3215
14466	-1	14466	Gba	glucosidase, beta, acid	2278
14468	1	14468	Gbp2b	guanylate binding protein 2b	2948
14469	1	14469	Gbp2	guanylate binding protein 2	2455
14470	-1	14470	Rabac1	Rab acceptor 1 (prenylated)	973
14528	1	14528	Gch1	GTP cyclohydrolase 1	2764
14537	-1	14537	Gcnt1	glucosaminyl (N-acetyl) transferase 1, core 2	4723
14538	-1	14538	Gcnt2	glucosaminyl (N-acetyl) transferase 2, I-branching enzyme	7157
14544	-1	14544	Gda	guanine deaminase	6066
14548	1	14548	Mrps33	mitochondrial ribosomal protein S33	1052
14555	-1	14555	Gpd1	glycerol-3-phosphate dehydrogenase 1 (soluble)	2785
14567	-1	14567	Gdi1	guanosine diphosphate (GDP) dissociation inhibitor 1	2657
14570	1	14570	Arhgdig	Rho GDP dissociation inhibitor (GDI) gamma	1032
14571	1	14571	Gpd2	glycerol phosphate dehydrogenase 2, mitochondrial	9166
14581	1	14581	Gfi1	growth factor independent 1 transcription repressor	3251
14585	1	14585	Gfra1	glial cell line derived neurotrophic factor family receptor alpha 1	4750
14586	-1	14586	Gfra2	glial cell line derived neurotrophic factor family receptor alpha 2	3554
14594	1	14594	Ggta1	glycoprotein galactosyltransferase alpha 1, 3	3586
14598	-1	14598	Ggt1	gamma-glutamyltransferase 1	2132
14605	-1	14605	Tsc22d3	TSC22 domain family, member 3	3645
14609	1	14609	Gja1	gap junction protein, alpha 1	3706
14635	1	14635	Galk1	galactokinase 1	1506
14663	-1	14663	Glycam1	glycosylation dependent cell adhesion molecule 1	668
14664	1	14664	Slc6a9	solute carrier family 6 (neurotransmitter transporter, glycine), member 9	3272
14667	-1	14667	Gm2a	GM2 ganglioside activator protein	4256
14672	-1	14672	Gna11	guanine nucleotide binding protein, alpha 11	3262
14682	1	14682	Gnaq	guanine nucleotide binding protein, alpha q polypeptide	5634
14686	1	14686	Gnat2	guanine nucleotide binding protein, alpha transducing 2	2544
14697	1	14697	Gnb5	guanine nucleotide binding protein (G protein), beta 5	2647
14701	1	14701	Gng12	guanine nucleotide binding protein (G protein), gamma 12	4363
14710	-1	14710	Gngt2	guanine nucleotide binding protein (G protein), gamma transducing activity polypeptide 2	850
14718	1	14718	Got1	glutamic-oxaloacetic transaminase 1, soluble	2057
14719	1	14719	Got2	glutamatic-oxaloacetic transaminase 2, mitochondrial	2345
14728	1	14728	Lilrb4a	leukocyte immunoglobulin-like receptor, subfamily B, member 4A	1500
14747	-1	14747	Cmklr1	chemokine-like receptor 1	2845
14751	1	14751	Gpi1	glucose phosphate isomerase 1	3560
14756	1	14756	Gpld1	glycosylphosphatidylinositol specific phospholipase D1	4659
14758	1	14758	Gpm6b	glycoprotein m6b	7239
14772	-1	14772	Grk4	G protein-coupled receptor kinase 4	4634
14782	1	14782	Gsr	glutathione reductase	2672
14786	-1	14786	Grb7	growth factor receptor bound protein 7	2522
14789	1	14789	P3h3	prolyl 3-hydroxylase 3	2779
14793	1	14793	Cdca3	cell division cycle associated 3	1488
14794	-1	14794	Spsb2	splA/ryanodine receptor domain and SOCS box containing 2	1298
14797	-1	14797	Tle5	TLE family member 5, transcriptional modulator	1680
14810	1	14810	Grin1	glutamate receptor, ionotropic, NMDA1 (zeta 1)	9290
14814	-1	14814	Grin2d	glutamate receptor, ionotropic, NMDA2D (epsilon 4)	4383
14815	-1	14815	Nr3c1	nuclear receptor subfamily 3, group C, member 1	6680
14841	1	14841	Haspin	histone H3 associated protein kinase	2811
14852	1	14852	Gspt1	G1 to S phase transition 1	6825
14854	1	14854	Gss	glutathione synthetase	1963
14860	-1	14860	Gsta4	glutathione S-transferase, alpha 4	958
14871	1	14871	Gstt1	glutathione S-transferase, theta 1	1037
14872	1	14872	Gstt2	glutathione S-transferase, theta 2	1882
14873	1	14873	Gsto1	glutathione S-transferase omega 1	1161
14885	1	14885	Gtf2h4	general transcription factor II H, polypeptide 4	1685
14886	-1	14886	Gtf2i	general transcription factor II I	4608
14913	1	14913	Guca1a	guanylate cyclase activator 1a (retina)	873
14933	1	14933	Gk	glycerol kinase	4529
14934	-1	14934	Gypa	glycophorin A	1827
14936	1	14936	Gys1	glycogen synthase 1, muscle	3681
14938	-1	14938	Gzma	granzyme A	1004
14939	1	14939	Gzmb	granzyme B	1416
14940	1	14940	Gzmc	granzyme C	934
14958	1	14958	H1f0	H1 histone family, member 0	2289
14960	-1	14960	H2-Aa	histocompatibility 2, class II antigen A, alpha	1356
14961	-1	14961	H2-Ab1	histocompatibility 2, class II antigen A, beta 1	1200
14962	-1	14962	Cfb	complement factor B	2747
14964	-1	14964	H2-D1	histocompatibility 2, D region locus 1	1875
14969	-1	14969	H2-Eb1	histocompatibility 2, class II antigen E beta	1813
14972	-1	14972	H2-K1	histocompatibility 2, K1, K region	2303
14976	1	14976	Pfdn6	prefoldin subunit 6	719
14979	-1	14979	H2-Ke6	H2-K region expressed gene 6	964
14980	-1	14980	H2-L	histocompatibility 2, D region locus L	411
14999	-1	14999	H2-DMb1	histocompatibility 2, class II, locus Mb1	1339
15000	-1	15000	H2-DMb2	histocompatibility 2, class II, locus Mb2	1185
15001	-1	15001	H2-Oa	histocompatibility 2, O region alpha locus	1275
15002	-1	15002	H2-Ob	histocompatibility 2, O region beta locus	2925
15015	-1	15015	H2-Q4	histocompatibility 2, Q region locus 4	1793
15016	-1	15016	H2-Q5	histocompatibility 2, Q region locus 5	1181
15018	-1	15018	H2-Q7	histocompatibility 2, Q region locus 7	1536
15019	-1	15019	H2-Q8	histocompatibility 2, Q region locus 8	1317
15064	-1	15064	Mr1	major histocompatibility complex, class I-related	3959
15077	-1	15077	Hist2h3c1	histone cluster 2, H3c1	2556
15114	1	15114	Hap1	huntingtin-associated protein 1	3706
15115	1	15115	Hars	histidyl-tRNA synthetase	2276
15130	-1	15130	Hbb-b2	hemoglobin, beta adult minor chain	630
15159	1	15159	Hccs	holocytochrome c synthetase	3805
15162	-1	15162	Hck	hemopoietic cell kinase	2092
15166	1	15166	Hcn2	hyperpolarization-activated, cyclic nucleotide-gated K+ 2	3195
15184	-1	15184	Hdac5	histone deacetylase 5	4588
15186	1	15186	Hdc	histidine decarboxylase	2399
15191	1	15191	Hdgf	heparin binding growth factor	2245
15199	-1	15199	Hebp1	heme binding protein 1	1061
15200	1	15200	Hbegf	heparin-binding EGF-like growth factor	4727
15201	1	15201	Hells	helicase, lymphoid specific	3019
15204	-1	15204	Herc2	HECT and RLD domain containing E3 ubiquitin protein ligase 2	15437
15205	-1	15205	Hes1	hes family bHLH transcription factor 1	1451
15211	-1	15211	Hexa	hexosaminidase A	1865
15213	-1	15213	Hey1	hairy/enhancer-of-split related with YRPW motif 1	2205
15216	-1	15216	Hfe	homeostatic iron regulator	1722
15223	1	15223	Foxj1	forkhead box J1	4123
15242	-1	15242	Hhex	hematopoietically expressed homeobox	1771
15248	1	15248	Hic1	hypermethylated in cancer 1	4492
15251	1	15251	Hif1a	hypoxia inducible factor 1, alpha subunit	5488
15254	1	15254	Hint1	histidine triad nucleotide binding protein 1	576
15270	1	15270	H2afx	H2A histone family, member X	1359
15273	-1	15273	Hivep2	human immunodeficiency virus type I enhancer binding protein 2	10374
15275	1	15275	Hk1	hexokinase 1	7544
15277	1	15277	Hk2	hexokinase 2	5511
15288	1	15288	Hmbs	hydroxymethylbilane synthase	1757
15312	1	15312	Hmgn1	high mobility group nucleosomal binding domain 1	1200
15331	1	15331	Hmgn2	high mobility group nucleosomal binding domain 2	1260
15354	1	15354	Hmgb3	high mobility group box 3	1798
15357	1	15357	Hmgcr	3-hydroxy-3-methylglutaryl-Coenzyme A reductase	4925
15361	1	15361	Hmga1	high mobility group AT-hook 1	2046
15366	1	15366	Hmmr	hyaluronan mediated motility receptor (RHAMM)	5269
15368	-1	15368	Hmox1	heme oxygenase 1	1576
15384	1	15384	Hnrnpab	heterogeneous nuclear ribonucleoprotein A/B	2816
15439	-1	15439	Hp	haptoglobin	1345
15441	-1	15441	Hp1bp3	heterochromatin protein 1, binding protein 3	5065
15442	1	15442	Hpse	heparanase	3481
15446	-1	15446	Hpgd	hydroxyprostaglandin dehydrogenase 15 (NAD)	1719
15452	1	15452	Hprt	hypoxanthine guanine phosphoribosyl transferase	1349
15461	1	15461	Hras	Harvey rat sarcoma virus oncogene	2272
15466	-1	15466	Hrh2	histamine receptor H2	2789
15469	1	15469	Prmt1	protein arginine N-methyltransferase 1	1679
15482	-1	15482	Hspa1l	heat shock protein 1-like	2415
15483	-1	15483	Hsd11b1	hydroxysteroid 11-beta dehydrogenase 1	1580
15485	-1	15485	Hsd17b1	hydroxysteroid (17-beta) dehydrogenase 1	1317
15490	1	15490	Hsd17b7	hydroxysteroid (17-beta) dehydrogenase 7	5008
15510	1	15510	Hspd1	heat shock protein 1 (chaperonin)	2332
15511	-1	15511	Hspa1b	heat shock protein 1B	2810
15516	1	15516	Hsp90ab1	heat shock protein 90 alpha (cytosolic), class B member 1	2507
15519	1	15519	Hsp90aa1	heat shock protein 90, alpha (cytosolic), class A member 1	2942
15525	1	15525	Hspa4	heat shock protein 4	5427
15526	1	15526	Hspa9	heat shock protein 9	3042
15528	1	15528	Hspe1	heat shock protein 1 (chaperonin 10)	768
15574	1	15574	Hus1	HUS1 checkpoint clamp component	6354
15587	1	15587	Hyal2	hyaluronoglucosaminidase 2	2231
15893	1	15893	Ica1	islet cell autoantigen 1	2342
15894	1	15894	Icam1	intercellular adhesion molecule 1	4364
15896	-1	15896	Icam2	intercellular adhesion molecule 2	1142
15898	1	15898	Icam5	intercellular adhesion molecule 5, telencephalin	2982
15900	1	15900	Irf8	interferon regulatory factor 8	6676
15902	-1	15902	Id2	inhibitor of DNA binding 2	1272
15925	1	15925	Ide	insulin degrading enzyme	5251
15931	-1	15931	Ids	iduronate 2-sulfatase	4972
15932	-1	15932	Idua	iduronidase, alpha-L	4430
15937	1	15937	Ier3	immediate early response 3	1090
15939	-1	15939	Ier5	immediate early response 5	3270
15944	1	15944	Irgm1	immunity-related GTPase family M member 1	2227
15945	1	15945	Cxcl10	chemokine (C-X-C motif) ligand 10	1519
15950	-1	15950	Ifi203	interferon activated gene 203	7452
15959	-1	15959	Ifit3	interferon-induced protein with tetratricopeptide repeats 3	1998
15965	1	15965	Ifna2	interferon alpha 2	573
15967	1	15967	Ifna4	interferon alpha 4	644
15977	1	15977	Ifnb1	interferon beta 1, fibroblast	770
15978	1	15978	Ifng	interferon gamma	1207
15979	-1	15979	Ifngr1	interferon gamma receptor 1	2099
15980	-1	15980	Ifngr2	interferon gamma receptor 2	2070
15983	1	15983	Ifrd2	interferon-related developmental regulator 2	1980
15985	-1	15985	Cd79b	CD79B antigen	1198
16000	-1	16000	Igf1	insulin-like growth factor 1	7817
16007	1	16007	Ccn1	cellular communication network factor 1	2028
16010	-1	16010	Igfbp4	insulin-like growth factor binding protein 4	2066
16069	-1	16069	Jchain	immunoglobulin joining chain	2102
16145	1	16145	Igtp	interferon gamma induced GTPase	2023
16149	-1	16149	Cd74	CD74 antigen (invariant polypeptide of major histocompatibility complex, class II antigen-associated)	1415
16150	-1	16150	Ikbkb	inhibitor of kappaB kinase beta	15776
16157	-1	16157	Il11ra1	interleukin 11 receptor, alpha chain 1	1961
16158	-1	16158	Il11ra2	interleukin 11 receptor, alpha chain 2	5360
16161	1	16161	Il12rb1	interleukin 12 receptor, beta 1	2872
16162	1	16162	Il12rb2	interleukin 12 receptor, beta 2	2947
16163	1	16163	Il13	interleukin 13	1206
16164	-1	16164	Il13ra1	interleukin 13 receptor, alpha 1	3685
16169	1	16169	Il15ra	interleukin 15 receptor, alpha chain	4111
16170	-1	16170	Il16	interleukin 16	7026
16172	-1	16172	Il17ra	interleukin 17 receptor A	3970
16175	1	16175	Il1a	interleukin 1 alpha	1995
16176	-1	16176	Il1b	interleukin 1 beta	1878
16177	-1	16177	Il1r1	interleukin 1 receptor, type I	5035
16182	-1	16182	Il18r1	interleukin 18 receptor 1	4817
16183	1	16183	Il2	interleukin 2	946
16184	1	16184	Il2ra	interleukin 2 receptor, alpha chain	5227
16185	1	16185	Il2rb	interleukin 2 receptor, beta chain	2696
16187	1	16187	Il3	interleukin 3	849
16189	1	16189	Il4	interleukin 4	843
16194	-1	16194	Il6ra	interleukin 6 receptor, alpha	3343
16195	-1	16195	Il6st	interleukin 6 signal transducer	7721
16197	-1	16197	Il7r	interleukin 7 receptor	4197
16199	-1	16199	Il9r	interleukin 9 receptor	3101
16205	-1	16205	Gimap1	GTPase, IMAP family member 1	1505
16210	-1	16210	Impact	impact, RWD domain protein	3432
16211	1	16211	Kpnb1	karyopherin (importin) beta 1	5909
16319	1	16319	Incenp	inner centromere protein	3229
16323	1	16323	Inhba	inhibin beta-A	1553
16332	1	16332	Inppl1	inositol polyphosphate phosphatase-like 1	5152
16337	-1	16337	Insr	insulin receptor	9682
16364	1	16364	Irf4	interferon regulatory factor 4	4683
16365	1	16365	Acod1	aconitate decarboxylase 1	2588
16391	-1	16391	Irf9	interferon regulatory factor 9	4640
16398	-1	16398	Itga2	integrin alpha 2	4218
16399	-1	16399	Itga2b	integrin alpha 2b	6846
16400	1	16400	Itga3	integrin alpha 3	5246
16401	-1	16401	Itga4	integrin alpha 4	11146
16403	-1	16403	Itga6	integrin alpha 6	8368
16407	-1	16407	Itgae	integrin alpha E, epithelial-associated	4572
16409	-1	16409	Itgam	integrin alpha M	6257
16410	1	16410	Itgav	integrin alpha V	9669
16411	-1	16411	Itgax	integrin alpha X	4311
16412	1	16412	Itgb1	integrin beta 1 (fibronectin receptor beta)	4275
16414	-1	16414	Itgb2	integrin beta 2	2956
16416	-1	16416	Itgb3	integrin beta 3	5898
16418	1	16418	Eif6	eukaryotic translation initiation factor 6	2454
16419	-1	16419	Itgb5	integrin beta 5	3282
16421	-1	16421	Itgb7	integrin beta 7	2674
16430	1	16430	Stt3a	STT3, subunit of the oligosaccharyltransferase complex, homolog A (S. cerevisiae)	2697
16431	1	16431	Itm2a	integral membrane protein 2A	1632
16432	-1	16432	Itm2b	integral membrane protein 2B	1850
16434	1	16434	Itpa	inosine triphosphatase (nucleoside triphosphate pyrophosphatase)	2507
16439	-1	16439	Itpr2	inositol 1,4,5-triphosphate receptor 2	12430
16440	-1	16440	Itpr3	inositol 1,4,5-triphosphate receptor 3	8990
16443	-1	16443	Itsn1	intersectin 1 (SH3 domain protein 1A)	19659
16451	-1	16451	Jak1	Janus kinase 1	5299
16452	1	16452	Jak2	Janus kinase 2	5055
16467	1	16467	Atcay	ataxia, cerebellar, Cayman type	3677
16475	1	16475	Ajuba	ajuba LIM protein	3752
16476	-1	16476	Jun	jun proto-oncogene	3187
16477	-1	16477	Junb	jun B proto-oncogene	1840
16480	-1	16480	Jup	junction plakoglobin	5158
16490	-1	16490	Kcna2	potassium voltage-gated channel, shaker-related subfamily, member 2	11582
16500	1	16500	Kcnb1	potassium voltage gated channel, Shab-related subfamily, member 1	11437
16502	-1	16502	Kcnc1	potassium voltage gated channel, Shaw-related subfamily, member 1	9410
16504	1	16504	Kcnc3	potassium voltage gated channel, Shaw-related subfamily, member 3	5187
16511	-1	16511	Kcnh2	potassium voltage-gated channel, subfamily H (eag-related), member 2	4648
16512	-1	16512	Kcnh3	potassium voltage-gated channel, subfamily H (eag-related), member 3	5392
16513	-1	16513	Kcnj10	potassium inwardly-rectifying channel, subfamily J, member 10	5407
16517	-1	16517	Kcnj16	potassium inwardly-rectifying channel, subfamily J, member 16	4025
16529	1	16529	Kcnk5	potassium channel, subfamily K, member 5	3364
16530	1	16530	Kcnk7	potassium channel, subfamily K, member 7	1117
16538	1	16538	Kcns1	K+ voltage-gated channel, subfamily S, 1	2712
16541	-1	16541	Napsa	napsin A aspartic peptidase	2129
16543	1	16543	Mdfic	MyoD family inhibitor domain containing	6261
16548	-1	16548	Khk	ketohexokinase	1117
16551	1	16551	Kif11	kinesin family member 11	4819
16553	1	16553	Kif13a	kinesin family member 13A	7148
16554	-1	16554	Kif13b	kinesin family member 13B	6269
16561	-1	16561	Kif1b	kinesin family member 1B	16841
16565	-1	16565	Kif21b	kinesin family member 21B	9299
16571	1	16571	Kif4	kinesin family member 4	4712
16576	1	16576	Kif7	kinesin family member 7	4534
16579	1	16579	Kifap3	kinesin-associated protein 3	4010
16581	-1	16581	Kifc2	kinesin family member C2	3368
16590	-1	16590	Kit	KIT proto-oncogene receptor tyrosine kinase	5634
16592	1	16592	Fabp5	fatty acid binding protein 5, epidermal	953
16594	-1	16594	Klc2	kinesin light chain 2	3054
16596	-1	16596	Klf1	Kruppel-like factor 1 (erythroid)	1534
16598	-1	16598	Klf2	Kruppel-like factor 2 (lung)	1816
16599	-1	16599	Klf3	Kruppel-like factor 3 (basic)	5149
16600	-1	16600	Klf4	Kruppel-like factor 4 (gut)	3044
16627	-1	16627	Klra1	killer cell lectin-like receptor, subfamily A, member 1	1667
16630	-1	16630	Klra12	killer cell lectin-like receptor subfamily A, member 12	1182
16633	-1	16633	Klra2	killer cell lectin-like receptor, subfamily A, member 2	1886
16634	-1	16634	Klra3	killer cell lectin-like receptor, subfamily A, member 3	1324
16635	-1	16635	Klra4	killer cell lectin-like receptor, subfamily A, member 4	980
16638	-1	16638	Klra7	killer cell lectin-like receptor, subfamily A, member 7	1472
16639	-1	16639	Klra8	killer cell lectin-like receptor, subfamily A, member 8	1185
16640	-1	16640	Klra9	killer cell lectin-like receptor subfamily A, member 9	2111
16642	-1	16642	Klrc2	killer cell lectin-like receptor subfamily C, member 2	3404
16643	-1	16643	Klrd1	killer cell lectin-like receptor, subfamily D, member 1	925
16647	1	16647	Kpna2	karyopherin (importin) alpha 2	2038
16648	1	16648	Kpna3	karyopherin (importin) alpha 3	4167
16656	1	16656	Hivep3	human immunodeficiency virus type I enhancer binding protein 3	10140
16658	-1	16658	Mafb	v-maf musculoaponeurotic fibrosarcoma oncogene family, protein B (avian)	3389
16666	1	16666	Krt16	keratin 16	1568
16667	1	16667	Krt17	keratin 17	1511
16728	-1	16728	L1cam	L1 cell adhesion molecule	5734
16763	1	16763	Lad1	ladinin	2992
16765	1	16765	Stmn1	stathmin 1	1060
16768	1	16768	Lag3	lymphocyte-activation gene 3	2003
16776	1	16776	Lama5	laminin, alpha 5	11494
16782	1	16782	Lamc2	laminin, gamma 2	6707
16790	-1	16790	Anpep	alanyl (membrane) aminopeptidase	3781
16792	-1	16792	Laptm5	lysosomal-associated protein transmembrane 5	2529
16796	-1	16796	Lasp1	LIM and SH3 protein 1	3433
16801	-1	16801	Arhgef1	Rho guanine nucleotide exchange factor (GEF) 1	5190
16803	-1	16803	Lbp	lipopolysaccharide binding protein	4054
16818	-1	16818	Lck	lymphocyte protein tyrosine kinase	2575
16819	-1	16819	Lcn2	lipocalin 2	853
16821	-1	16821	Lcn4	lipocalin 4	774
16825	-1	16825	Ldb1	LIM domain binding 1	2740
16828	1	16828	Ldha	lactate dehydrogenase A	1930
16835	1	16835	Ldlr	low density lipoprotein receptor	6201
16842	-1	16842	Lef1	lymphoid enhancer binding factor 1	8835
16848	-1	16848	Lfng	LFNG O-fucosylpeptide 3-beta-N-acetylglucosaminyltransferase	2449
16852	1	16852	Lgals1	lectin, galactose binding, soluble 1	800
16855	-1	16855	Lgals4	lectin, galactose binding, soluble 4	1439
16858	1	16858	Lgals7	lectin, galactose binding, soluble 7	597
16865	1	16865	Eif2d	eukaryotic translation initiation factor 2D	5297
16870	1	16870	Lhx2	LIM homeobox protein 2	2820
16878	1	16878	Lif	leukemia inhibitory factor	4339
16880	-1	16880	Lifr	LIF receptor alpha	10555
16881	1	16881	Lig1	ligase I, DNA, ATP-dependent	3525
16886	-1	16886	Limk2	LIM motif-containing protein kinase 2	5050
16889	-1	16889	Lipa	lysosomal acid lipase A	2971
16891	1	16891	Lipg	lipase, endothelial	4715
16898	1	16898	Rps2	ribosomal protein S2	1152
16905	-1	16905	Lmna	lamin A	3362
16906	1	16906	Lmnb1	lamin B1	2843
16909	-1	16909	Lmo2	LIM domain only 2	1900
16922	-1	16922	Phyh	phytanoyl-CoA hydroxylase	1474
16952	-1	16952	Anxa1	annexin A1	1395
16956	-1	16956	Lpl	lipoprotein lipase	6125
16963	1	16963	Xcl1	chemokine (C motif) ligand 1	502
16970	1	16970	Lrmp	lymphoid-restricted membrane protein	3502
16971	-1	16971	Lrp1	low density lipoprotein receptor-related protein 1	15731
16973	1	16973	Lrp5	low density lipoprotein receptor-related protein 5	6001
16974	-1	16974	Lrp6	low density lipoprotein receptor-related protein 6	9768
16977	-1	16977	Lrrc23	leucine rich repeat containing 23	1444
16987	1	16987	Lss	lanosterol synthase	7000
16988	-1	16988	Lst1	leukocyte specific transcript 1	416
16992	1	16992	Lta	lymphotoxin A	1383
16994	-1	16994	Ltb	lymphotoxin B	1433
16998	1	16998	Ltbp3	latent transforming growth factor beta binding protein 3	7322
17002	-1	17002	Ltf	lactotransferrin	2742
17025	1	17025	Alad	aminolevulinate, delta-, dehydratase	4601
17035	1	17035	Lxn	latexin	1092
170459	1	170459	Stard4	StAR-related lipid transfer (START) domain containing 4	3369
17057	-1	17057	Klrb1a	killer cell lectin-like receptor subfamily B member 1A	1274
17059	-1	17059	Klrb1c	killer cell lectin-like receptor subfamily B member 1C	2960
17060	-1	17060	Blnk	B cell linker	2097
170638	1	170638	Hpcal4	hippocalcin-like 4	4652
17064	-1	17064	Cd93	CD93 antigen	6638
170658	1	170658	BC002163	NADH dehydrogenase Fe-S protein 5 pseudogene	500
17067	-1	17067	Ly6c1	lymphocyte antigen 6 complex, locus C1	1645
17068	-1	17068	Ly6d	lymphocyte antigen 6 complex, locus D	691
17069	-1	17069	Ly6e	lymphocyte antigen 6 complex, locus E	2301
170716	-1	170716	Cyp4f13	cytochrome P450, family 4, subfamily f, polypeptide 13	1711
170736	-1	170736	Parvb	parvin, beta	3705
170737	-1	170737	Znrf1	zinc and ring finger 1	5686
170740	-1	170740	Zfp287	zinc finger protein 287	5654
170741	-1	170741	Pilrb1	paired immunoglobin-like type 2 receptor beta 1	1362
170742	-1	170742	Sertad3	SERTA domain containing 3	1257
170744	-1	170744	Tlr8	toll-like receptor 8	3158
170745	1	170745	Xpnpep2	X-prolyl aminopeptidase (aminopeptidase P) 2, membrane-bound	3699
170750	1	170750	Xpnpep1	X-prolyl aminopeptidase (aminopeptidase P) 1, soluble	3949
170752	1	170752	Bco2	beta-carotene oxygenase 2	2075
170755	-1	170755	Sgk3	serum/glucocorticoid regulated kinase 3	6052
170756	-1	170756	Slc8b1	solute carrier family 8 (sodium/lithium/calcium exchanger), member B1	2881
170762	1	170762	Nup155	nucleoporin 155	7318
170772	-1	170772	Glcci1	glucocorticoid induced transcript 1	8081
170786	-1	170786	Cd209a	CD209a antigen	1585
17079	-1	17079	Cd180	CD180 antigen	3721
170799	1	170799	Rtkn2	rhotekin 2	4948
170823	1	170823	Glmn	glomulin, FKBP associated protein	2097
170826	-1	170826	Ppargc1b	peroxisome proliferative activated receptor, gamma, coactivator 1 beta	3735
170829	-1	170829	Tram2	translocating chain-associating membrane protein 2	1390
17083	1	17083	Tmed1	transmembrane p24 trafficking protein 1	1487
170833	1	170833	Hook2	hook microtubule tethering protein 2	3997
17084	-1	17084	Ly86	lymphocyte antigen 86	997
17086	-1	17086	Ncr1	natural cytotoxicity triggering receptor 1	1540
17089	1	17089	Lyar	Ly1 antibody reactive clone	1799
170930	1	170930	Sumo2	small ubiquitin-like modifier 2	998
170936	-1	170936	Zfp369	zinc finger protein 369	5341
17095	-1	17095	Lyl1	lymphoblastomic leukemia 1	1801
17096	-1	17096	Lyn	LYN proto-oncogene, Src family tyrosine kinase	3456
17101	-1	17101	Lyst	lysosomal trafficking regulator	13834
17105	-1	17105	Lyz2	lysozyme 2	1057
17110	-1	17110	Lyz1	lysozyme 1	1265
171207	-1	171207	Arhgap4	Rho GTPase activating protein 4	4054
17121	1	17121	Mxd3	Max dimerization protein 3	1299
171210	-1	171210	Acot2	acyl-CoA thioesterase 2	2198
171211	-1	171211	Edaradd	EDAR (ectodysplasin-A receptor)-associated death domain	8103
171212	-1	171212	Galnt10	polypeptide N-acetylgalactosaminyltransferase 10	5613
17122	-1	17122	Mxd4	Max dimerization protein 4	1179
17127	-1	17127	Smad3	SMAD family member 3	5090
17128	-1	17128	Smad4	SMAD family member 4	3547
171284	1	171284	Timd2	T cell immunoglobulin and mucin domain containing 2	3388
171286	1	171286	Slc12a8	solute carrier family 12 (potassium/chloride transporters), member 8	3687
17129	-1	17129	Smad5	SMAD family member 5	7413
17131	-1	17131	Smad7	SMAD family member 7	4441
17132	-1	17132	Maf	avian musculoaponeurotic fibrosarcoma oncogene homolog	3642
17133	-1	17133	Maff	v-maf musculoaponeurotic fibrosarcoma oncogene family, protein F (avian)	2597
17134	1	17134	Mafg	v-maf musculoaponeurotic fibrosarcoma oncogene family, protein G (avian)	1636
17135	-1	17135	Mafk	v-maf musculoaponeurotic fibrosarcoma oncogene family, protein K (avian)	2825
171429	-1	171429	Slc26a6	solute carrier family 26, member 6	2731
17149	1	17149	Magoh	mago homolog, exon junction complex core component	692
171504	-1	171504	Apobr	apolipoprotein B receptor	3599
17151	-1	17151	Ccndbp1	cyclin D-type binding-protein 1	1680
171543	-1	171543	Bmf	BCL2 modifying factor	4823
171567	1	171567	Nme7	NME/NM23 family member 7	3650
17159	-1	17159	Man2b1	mannosidase 2, alpha B1	4325
17161	1	17161	Maoa	monoamine oxidase A	4161
17164	1	17164	Mapkapk2	MAP kinase-activated protein kinase 2	2567
17167	-1	17167	Marco	macrophage receptor with collagenous structure	1985
17179	-1	17179	Matk	megakaryocyte-associated tyrosine kinase	2671
17207	1	17207	Mcf2l	mcf.2 transforming sequence-like	10005
17210	-1	17210	Mcl1	myeloid cell leukemia sequence 1	3487
17215	1	17215	Mcm3	minichromosome maintenance complex component 3	2886
17216	1	17216	Mcm2	minichromosome maintenance complex component 2	3371
17217	1	17217	Mcm4	minichromosome maintenance complex component 4	3589
17218	1	17218	Mcm5	minichromosome maintenance complex component 5	3517
17219	1	17219	Mcm6	minichromosome maintenance complex component 6	4366
17220	1	17220	Mcm7	minichromosome maintenance complex component 7	2396
17221	-1	17221	Cd46	CD46 antigen, complement regulatory protein	1286
17228	-1	17228	Cma1	chymase 1, mast cell	1076
17231	-1	17231	Mcpt8	mast cell protease 8	924
17245	1	17245	Mdm1	transformed mouse 3T3 cell double minute 1	3175
17248	-1	17248	Mdm4	transformed mouse 3T3 cell double minute 4	7354
17252	1	17252	Rdh11	retinol dehydrogenase 11	1750
17257	-1	17257	Mecp2	methyl CpG binding protein 2	10559
17258	-1	17258	Mef2a	myocyte enhancer factor 2A	6221
17259	-1	17259	Mef2b	myocyte enhancer factor 2B	1402
17260	-1	17260	Mef2c	myocyte enhancer factor 2C	7622
17261	-1	17261	Mef2d	myocyte enhancer factor 2D	3375
17268	-1	17268	Meis1	Meis homeobox 1	5901
17279	1	17279	Melk	maternal embryonic leucine zipper kinase	2914
17281	-1	17281	Fyco1	FYVE and coiled-coil domain containing 1	8758
17289	-1	17289	Mertk	MER proto-oncogene tyrosine kinase	3589
17305	-1	17305	Mfng	MFNG O-fucosylpeptide 3-beta-N-acetylglucosaminyltransferase	1834
17314	1	17314	Mgmt	O-6-methylguanine-DNA methyltransferase	819
17319	1	17319	Mif	macrophage migration inhibitory factor (glycosylation-inhibiting factor)	554
17342	-1	17342	Mitf	melanogenesis associated transcription factor	6080
17345	1	17345	Mki67	antigen identified by monoclonal antibody Ki 67	10075
17346	-1	17346	Mknk1	MAP kinase-interacting serine/threonine kinase 1	2699
17349	1	17349	Mlf1	myeloid leukemia factor 1	1161
17355	-1	17355	Aff1	AF4/FMR2 family, member 1	8915
17356	1	17356	Afdn	afadin, adherens junction formation factor	8443
17357	1	17357	Marcksl1	MARCKS-like 1	1601
17364	-1	17364	Trpm1	transient receptor potential cation channel, subfamily M, member 1	10591
17385	-1	17385	Mmp11	matrix metallopeptidase 11	2247
17387	-1	17387	Mmp14	matrix metallopeptidase 14 (membrane-inserted)	2597
17388	-1	17388	Mmp15	matrix metallopeptidase 15	4279
17394	-1	17394	Mmp8	matrix metallopeptidase 8	2453
17395	-1	17395	Mmp9	matrix metallopeptidase 9	3174
17425	-1	17425	Foxk1	forkhead box K1	7446
17427	1	17427	Mns1	meiosis-specific nuclear structural protein 1	1807
17444	-1	17444	Grap2	GRB2-related adaptor protein 2	5854
17448	1	17448	Mdh2	malate dehydrogenase 2, NAD (mitochondrial)	1282
17463	1	17463	Psmd7	proteasome (prosome, macropain) 26S subunit, non-ATPase, 7	1600
17470	1	17470	Cd200	CD200 antigen	2465
17523	-1	17523	Mpo	myeloperoxidase	2546
17533	-1	17533	Mrc1	mannose receptor, C type 1	5318
17535	1	17535	Mre11a	MRE11A homolog A, double strand break repair nuclease	3004
17537	-1	17537	Meis3	Meis homeobox 3	1929
17540	-1	17540	Mrvi1	MRV integration site 1	6416
17684	-1	17684	Cited2	Cbp/p300-interacting transactivator, with Glu/Asp-rich carboxy-terminal domain, 2	2091
17691	-1	17691	Sik1	salt inducible kinase 1	4509
17698	-1	17698	Msn	moesin	6325
17713	1	17713	Grpel1	GrpE-like 1, mitochondrial	3338
17748	1	17748	Mt1	metallothionein 1	755
17750	1	17750	Mt2	metallothionein 2	556
17760	1	17760	Map6	microtubule-associated protein 6	6115
17766	1	17766	Nudt1	nudix (nucleoside diphosphate linked moiety X)-type motif 1	939
17768	1	17768	Mthfd2	methylenetetrahydrofolate dehydrogenase (NAD+ dependent), methenyltetrahydrofolate cyclohydrolase	2070
17777	1	17777	Mttp	microsomal triglyceride transfer protein	4414
17831	1	17831	Muc2	mucin 2	6856
17846	1	17846	Commd1	COMM domain containing 1	1701
17857	1	17857	Mx1	MX dynamin-like GTPase 1	3231
17859	1	17859	Mxi1	MAX interactor 1, dimerization protein	6163
17864	1	17864	Mybl1	myeloblastosis oncogene-like 1	4984
17865	1	17865	Mybl2	myeloblastosis oncogene-like 2	3702
17869	1	17869	Myc	myelocytomatosis oncogene	2484
17872	-1	17872	Ppp1r15a	protein phosphatase 1, regulatory subunit 15A	2936
17886	-1	17886	Myh9	myosin, heavy polypeptide 9, non-muscle	10398
17896	1	17896	Myl4	myosin, light polypeptide 4	929
17909	-1	17909	Myo10	myosin X	8739
17913	1	17913	Myo1c	myosin IC	5966
17916	-1	17916	Myo1f	myosin IF	4926
17920	-1	17920	Myo6	myosin VI	7964
17929	-1	17929	Myom1	myomesin 1	6844
17937	1	17937	Nab2	Ngfi-A binding protein 2	2575
17939	-1	17939	Naga	N-acetyl galactosaminidase, alpha	2082
17948	-1	17948	Naip2	NLR family, apoptosis inhibitory protein 2	4853
17951	-1	17951	Naip5	NLR family, apoptosis inhibitory protein 5	5851
17952	-1	17952	Naip6	NLR family, apoptosis inhibitory protein 6	6845
17965	1	17965	Nbl1	NBL1, DAN family BMP antagonist	1762
17966	-1	17966	Nbr1	NBR1, autophagy cargo receptor	5133
17969	1	17969	Ncf1	neutrophil cytosolic factor 1	3088
17974	-1	17974	Nck2	non-catalytic region of tyrosine kinase adaptor protein 2	4041
17975	1	17975	Ncl	nucleolin	8257
17977	-1	17977	Ncoa1	nuclear receptor coactivator 1	8373
17988	1	17988	Ndrg1	N-myc downstream regulated gene 1	5894
17992	1	17992	Ndufa4	Ndufa4, mitochondrial complex associated	492
17997	1	17997	Nedd1	neural precursor cell expressed, developmentally down-regulated gene 1	3851
18000	1	18000	2002-09-01	septin 2	3334
18002	1	18002	Nedd8	neural precursor cell expressed, developmentally down-regulated gene 8	602
18004	1	18004	Nek1	NIMA (never in mitosis gene a)-related expressed kinase 1	7888
18005	1	18005	Nek2	NIMA (never in mitosis gene a)-related expressed kinase 2	4132
18007	1	18007	Neo1	neogenin	8798
18008	1	18008	Nes	nestin	6401
18021	-1	18021	Nfatc3	nuclear factor of activated T cells, cytoplasmic, calcineurin dependent 3	6545
18022	-1	18022	Nfe2	nuclear factor, erythroid derived 2	2793
18024	-1	18024	Nfe2l2	nuclear factor, erythroid derived 2, like 2	3790
18027	-1	18027	Nfia	nuclear factor I/A	11270
18029	-1	18029	Nfic	nuclear factor I/C	6304
18030	1	18030	Nfil3	nuclear factor, interleukin 3, regulated	2180
18033	1	18033	Nfkb1	nuclear factor of kappa light polypeptide gene enhancer in B cells 1, p105	4674
18034	1	18034	Nfkb2	nuclear factor of kappa light polypeptide gene enhancer in B cells 2, p49/p100	3926
18036	1	18036	Nfkbib	nuclear factor of kappa light polypeptide gene enhancer in B cells inhibitor, beta	2000
18054	-1	18054	Ngp	neutrophilic granule protein	1161
18080	-1	18080	Nin	ninein	12265
18099	-1	18099	Nlk	nemo like kinase	5499
18100	1	18100	Mrpl40	mitochondrial ribosomal protein L40	1055
18102	1	18102	Nme1	NME/NM23 nucleoside diphosphate kinase 1	1235
18103	1	18103	Nme2	NME/NM23 nucleoside diphosphate kinase 2	1168
18106	-1	18106	Cd244a	CD244 molecule A	4075
18124	1	18124	Nr4a3	nuclear receptor subfamily 4, group A, member 3	2582
18126	1	18126	Nos2	nitric oxide synthase 2, inducible	3990
18140	1	18140	Uhrf1	ubiquitin-like, containing PHD and RING finger domains, 1	3651
18143	1	18143	Npas2	neuronal PAS domain protein 2	4180
18148	1	18148	Npm1	nucleophosmin 1	1822
18159	1	18159	Nppc	natriuretic peptide type C	1042
18173	-1	18173	Slc11a1	solute carrier family 11 (proton-coupled divalent metal ion transporters), member 1	2304
18186	1	18186	Nrp1	neuropilin 1	10066
18187	-1	18187	Nrp2	neuropilin 2	9615
18191	-1	18191	Nrxn3	neurexin III	12354
18194	1	18194	Nsdhl	NAD(P) dependent steroid dehydrogenase-like	2218
18197	-1	18197	Nsg2	neuron specific gene family member 2	4017
18213	-1	18213	Ntrk3	neurotrophic tyrosine kinase, receptor, type 3	6549
18221	1	18221	Nudc	nudC nuclear distribution protein	1347
18226	1	18226	Nup62	nucleoporin 62	2434
18227	1	18227	Nr4a2	nuclear receptor subfamily 4, group A, member 2	3564
18230	1	18230	Nxn	nucleoredoxin	3212
18242	1	18242	Oat	ornithine aminotransferase	2155
18263	1	18263	Odc1	ornithine decarboxylase, structural 1	2547
18301	-1	18301	Fxyd5	FXYD domain-containing ion transport regulator 5	3600
18356	1	18356	Olfr56	olfactory receptor 56	2489
18390	1	18390	Oprm1	opioid receptor, mu 1	6194
18391	1	18391	Sigmar1	sigma non-opioid intracellular receptor 1	1640
18392	1	18392	Orc1	origin recognition complex, subunit 1	3012
18393	1	18393	Orc2	origin recognition complex, subunit 2	3561
18408	1	18408	Slc25a15	solute carrier family 25 (mitochondrial carrier ornithine transporter), member 15	3455
18412	-1	18412	Sqstm1	sequestosome 1	2030
18415	1	18415	Hspa4l	heat shock protein 4 like	5038
18423	1	18423	Otx1	orthodenticle homeobox 1	5219
18426	1	18426	Ovol1	ovo like zinc finger 1	2900
18432	1	18432	Mybbp1a	MYB binding protein (P160) 1a	4314
18439	-1	18439	P2rx7	purinergic receptor P2X, ligand-gated ion channel, 7	5514
18441	1	18441	P2ry1	purinergic receptor P2Y, G-protein coupled 1	3899
18442	1	18442	P2ry2	purinergic receptor P2Y, G-protein coupled 2	3198
18451	1	18451	P4ha1	procollagen-proline, 2-oxoglutarate 4-dioxygenase (proline 4-hydroxylase), alpha 1 polypeptide	4125
18452	1	18452	P4ha2	procollagen-proline, 2-oxoglutarate 4-dioxygenase (proline 4-hydroxylase), alpha II polypeptide	5089
18453	1	18453	P4hb	prolyl 4-hydroxylase, beta polypeptide	2538
18476	1	18476	Pafah1b3	platelet-activating factor acetylhydrolase, isoform 1b, subunit 3	1025
18477	1	18477	Prdx1	peroxiredoxin 1	1417
18507	-1	18507	Pax5	paired box 5	1208
18515	-1	18515	Pbx2	pre B cell leukemia homeobox 2	2801
18516	1	18516	Pbx3	pre B cell leukemia homeobox 3	5566
18519	-1	18519	Kat2b	K(lysine) acetyltransferase 2B	4708
18538	1	18538	Pcna	proliferating cell nuclear antigen	1260
18563	1	18563	Pcx	pyruvate carboxylase	4272
18566	1	18566	Pdcd1	programmed cell death 1	1930
18569	-1	18569	Pdcd4	programmed cell death 4	2556
18573	1	18573	Pde1a	phosphodiesterase 1A, calmodulin-dependent	5119
18574	-1	18574	Pde1b	phosphodiesterase 1B, Ca2+-calmodulin dependent	3667
18576	-1	18576	Pde3b	phosphodiesterase 3B, cGMP-inhibited	5286
18578	-1	18578	Pde4b	phosphodiesterase 4B, cAMP specific	8737
18590	1	18590	Pdgfa	platelet derived growth factor, alpha	1087
18591	1	18591	Pdgfb	platelet derived growth factor, B polypeptide	3876
18599	-1	18599	Padi1	peptidyl arginine deiminase, type I	3756
18600	-1	18600	Padi2	peptidyl arginine deiminase, type II	4913
18601	-1	18601	Padi3	peptidyl arginine deiminase, type III	3443
18604	-1	18604	Pdk2	pyruvate dehydrogenase kinase, isoenzyme 2	2263
18606	-1	18606	Enpp2	ectonucleotide pyrophosphatase/phosphodiesterase 2	5299
18611	-1	18611	Pea15a	phosphoprotein enriched in astrocytes 15A	2477
18612	1	18612	Etv4	ets variant 4	3984
18613	-1	18613	Pecam1	platelet/endothelial cell adhesion molecule 1	3333
18619	1	18619	Penk	preproenkephalin	1593
18626	-1	18626	Per1	period circadian clock 1	5577
18631	1	18631	Pex11a	peroxisomal biogenesis factor 11 alpha	879
18636	-1	18636	Cfp	complement factor properdin	1524
18639	1	18639	Pfkfb1	6-phosphofructo-2-kinase/fructose-2,6-biphosphatase 1	1739
18640	-1	18640	Pfkfb2	6-phosphofructo-2-kinase/fructose-2,6-biphosphatase 2	10878
18641	1	18641	Pfkl	phosphofructokinase, liver, B-type	3717
18646	-1	18646	Prf1	perforin 1 (pore forming protein)	2164
18647	-1	18647	Cdk14	cyclin-dependent kinase 14	13026
18648	1	18648	Pgam1	phosphoglycerate mutase 1	1832
18655	1	18655	Pgk1	phosphoglycerate kinase 1	1825
18669	1	18669	Abcb1b	ATP-binding cassette, sub-family B (MDR/TAP), member 1B	4677
18673	1	18673	Phb	prohibitin	1799
18701	1	18701	Pigf	phosphatidylinositol glycan anchor biosynthesis, class F	980
18707	-1	18707	Pik3cd	phosphatidylinositol-4,5-bisphosphate 3-kinase catalytic subunit delta	5927
18708	-1	18708	Pik3r1	phosphoinositide-3-kinase regulatory subunit 1	9342
18710	-1	18710	Pik3r3	phosphoinositide-3-kinase regulatory subunit 3	5004
18715	1	18715	Pim2	proviral integration site 2	2041
18716	-1	18716	Pip	prolactin induced protein	571
18717	-1	18717	Pip5k1c	phosphatidylinositol-4-phosphate 5-kinase, type 1 gamma	4379
18718	-1	18718	Pip4k2a	phosphatidylinositol-5-phosphate 4-kinase, type II, alpha	3471
18719	1	18719	Pip5k1b	phosphatidylinositol-4-phosphate 5-kinase, type 1 beta	2526
18722	-1	18722	Pira1	paired-Ig-like receptor A1	3562
18725	-1	18725	Pira2	paired-Ig-like receptor A2	7270
18733	-1	18733	Pirb	paired Ig-like receptor B	3283
18739	-1	18739	Pitpnm1	phosphatidylinositol transfer protein, membrane-associated 1	4728
18744	-1	18744	Pja1	praja ring finger ubiquitin ligase 1	2986
18746	1	18746	Pkm	pyruvate kinase, muscle	3492
18749	-1	18749	Prkacb	protein kinase, cAMP dependent, catalytic, beta	5081
18750	1	18750	Prkca	protein kinase C, alpha	8369
18751	-1	18751	Prkcb	protein kinase C, beta	8829
18761	-1	18761	Prkcq	protein kinase C, theta	5368
18762	-1	18762	Prkcz	protein kinase C, zeta	6406
18763	-1	18763	Pkd1	polycystin 1, transient receptor poteintial channel interacting	14189
18769	1	18769	Pkig	protein kinase inhibitor, gamma	1426
18770	-1	18770	Pklr	pyruvate kinase liver and red blood cell	2802
18782	-1	18782	Pla2g2d	phospholipase A2, group IID	2340
18787	1	18787	Serpine1	serine (or cysteine) peptidase inhibitor, clade E, member 1	3878
18791	-1	18791	Plat	plasminogen activator, tissue	5650
18796	-1	18796	Plcb2	phospholipase C, beta 2	5911
18799	1	18799	Plcd1	phospholipase C, delta 1	2908
18803	-1	18803	Plcg1	phospholipase C, gamma 1	5785
18807	-1	18807	Pld3	phospholipase D family, member 3	2248
18810	-1	18810	Plec	plectin	17558
18813	1	18813	Pa2g4	proliferation-associated 2G4	2432
18816	-1	18816	Serpinf2	serine (or cysteine) peptidase inhibitor, clade F, member 2	2192
18817	1	18817	Plk1	polo like kinase 1	2359
18822	-1	18822	Plod1	procollagen-lysine, 2-oxoglutarate 5-dioxygenase 1	6184
18823	-1	18823	Plp1	proteolipid protein (myelin) 1	3473
18824	1	18824	Plp2	proteolipid protein 2	870
18830	-1	18830	Pltp	phospholipid transfer protein	1806
18854	1	18854	Pml	promyelocytic leukemia	6320
18938	1	18938	Ppp1r14b	protein phosphatase 1, regulatory inhibitor subunit 14B	919
18946	-1	18946	Pnliprp1	pancreatic lipase related protein 1	1619
18950	1	18950	Pnp	purine-nucleoside phosphorylase	2941
18952	-1	18952	2004-09-01	septin 4	2749
18968	1	18968	Pola1	polymerase (DNA directed), alpha 1	8662
18969	1	18969	Pola2	polymerase (DNA directed), alpha 2	6608
18971	1	18971	Pold1	polymerase (DNA directed), delta 1, catalytic subunit	3583
18972	1	18972	Pold2	polymerase (DNA directed), delta 2, regulatory subunit	1610
18973	1	18973	Pole	polymerase (DNA directed), epsilon	9180
18974	1	18974	Pole2	polymerase (DNA directed), epsilon 2 (p59 subunit)	1733
18987	1	18987	Pou2f2	POU domain, class 2, transcription factor 2	3721
18996	1	18996	Pou4f1	POU domain, class 4, transcription factor 1	3796
19009	-1	19009	Pou6f1	POU domain, class 6, transcription factor 1	5516
19012	1	19012	Plpp1	phospholipid phosphatase 1	1765
19025	-1	19025	Ctsa	cathepsin A	3626
19049	1	19049	Ppp1r1b	protein phosphatase 1, regulatory inhibitor subunit 1B	2262
19054	-1	19054	Ppp2r3d	protein phosphatase 2 (formerly 2A), regulatory subunit B'', delta	2517
19055	-1	19055	Ppp3ca	protein phosphatase 3, catalytic subunit, alpha isoform	4897
19062	-1	19062	Inpp5k	inositol polyphosphate 5-phosphatase K	4338
19072	1	19072	Prep	prolyl endopeptidase	2719
19074	-1	19074	Prg2	proteoglycan 2, bone marrow	838
19075	1	19075	Prim1	DNA primase, p49 subunit	1533
19076	1	19076	Prim2	DNA primase, p58 subunit	3571
19087	1	19087	Prkar2a	protein kinase, cAMP dependent regulatory, type II alpha	4040
19090	-1	19090	Prkdc	protein kinase, DNA activated, catalytic polypeptide	13233
19106	1	19106	Eif2ak2	eukaryotic translation initiation factor 2-alpha kinase 2	4326
19108	-1	19108	Prkx	protein kinase, X-linked	4870
19116	-1	19116	Prlr	prolactin receptor	14312
19122	1	19122	Prnp	prion protein	3732
19124	1	19124	Procr	protein C receptor, endothelial	1745
19125	1	19125	Prodh	proline dehydrogenase	2684
19128	1	19128	Pros1	protein S (alpha)	3270
19132	1	19132	Prph	peripherin	1865
19139	1	19139	Prps1	phosphoribosyl pyrophosphate synthetase 1	1975
19141	-1	19141	Lgmn	legumain	1888
19142	-1	19142	Prss12	protease, serine 12 neurotrypsin (motopsin)	2607
19143	1	19143	St14	suppression of tumorigenicity 14 (colon carcinoma)	4017
19156	-1	19156	Psap	prosaposin	2731
19157	-1	19157	Cyth1	cytohesin 1	3371
19165	-1	19165	Psen2	presenilin 2	3290
19166	1	19166	Psma2	proteasome (prosome, macropain) subunit, alpha type 2	946
19167	1	19167	Psma3	proteasome (prosome, macropain) subunit, alpha type 3	1444
19172	1	19172	Psmb4	proteasome (prosome, macropain) subunit, beta type 4	949
19173	1	19173	Psmb5	proteasome (prosome, macropain) subunit, beta type 5	871
19175	1	19175	Psmb6	proteasome (prosome, macropain) subunit, beta type 6	1036
19177	1	19177	Psmb7	proteasome (prosome, macropain) subunit, beta type 7	3230
19179	1	19179	Psmc1	protease (prosome, macropain) 26S subunit, ATPase 1	1495
19181	1	19181	Psmc2	proteasome (prosome, macropain) 26S subunit, ATPase 2	1782
19183	1	19183	Psmc3ip	proteasome (prosome, macropain) 26S subunit, ATPase 3, interacting protein	1056
19184	1	19184	Psmc5	protease (prosome, macropain) 26S subunit, ATPase 5	1277
19192	1	19192	Psme3	proteaseome (prosome, macropain) activator subunit 3 (PA28 gamma, Ki)	2694
19194	-1	19194	Bpifa2	BPI fold containing family A, member 2	961
19201	-1	19201	Pstpip2	proline-serine-threonine phosphatase-interacting protein 2	3041
19211	-1	19211	Pten	phosphatase and tensin homolog	10956
19212	1	19212	Pter	phosphotriesterase related	3706
192120	1	192120	Bspry	B-box and SPRY domain containing	2153
192156	1	192156	Mvd	mevalonate (diphospho) decarboxylase	1864
192166	-1	192166	Sardh	sarcosine dehydrogenase	4683
192169	1	192169	Ufsp2	UFM1-specific peptidase 2	1718
19217	1	19217	Ptger2	prostaglandin E receptor 2 (subtype EP2)	3768
192176	-1	192176	Flna	filamin, alpha	8371
192188	-1	192188	Stab2	stabilin 2	10331
192191	1	192191	Med9	mediator complex subunit 9	3013
192192	-1	192192	Shkbp1	Sh3kbp1 binding protein 1	2615
192195	-1	192195	Ash1l	ASH1 like histone lysine methyltransferase	11295
192197	-1	192197	Bcas3	breast carcinoma amplified sequence 3	5185
19221	1	19221	Ptgfrn	prostaglandin F2 receptor negative regulator	5786
19224	-1	19224	Ptgs1	prostaglandin-endoperoxide synthase 1	2866
192285	-1	192285	Phf21a	PHD finger protein 21A	6912
19229	-1	19229	Ptk2b	PTK2 protein tyrosine kinase 2 beta	4632
192292	-1	192292	Nrbp1	nuclear receptor binding protein 1	2647
19231	1	19231	Ptma	prothymosin alpha	1192
19243	-1	19243	Ptp4a1	protein tyrosine phosphatase 4a1	4129
19248	-1	19248	Ptpn12	protein tyrosine phosphatase, non-receptor type 12	3166
19252	-1	19252	Dusp1	dual specificity phosphatase 1	1942
19253	-1	19253	Ptpn18	protein tyrosine phosphatase, non-receptor type 18	1690
19259	1	19259	Ptpn5	protein tyrosine phosphatase, non-receptor type 5	4489
19261	-1	19261	Sirpa	signal-regulatory protein alpha	4267
192652	-1	192652	Wdr81	WD repeat domain 81	6916
192656	1	192656	Ripk2	receptor (TNFRSF)-interacting serine-threonine kinase 2	2025
192657	1	192657	Ell2	elongation factor RNA polymerase II 2	5467
19267	-1	19267	Ptpre	protein tyrosine phosphatase, receptor type, E	6687
192678	-1	192678	Rassf3	Ras association (RalGDS/AF-6) domain family member 3	3424
19268	1	19268	Ptprf	protein tyrosine phosphatase, receptor type, F	7648
19272	1	19272	Ptprk	protein tyrosine phosphatase, receptor type, K	8925
192734	-1	192734	Lrrc75b	leucine rich repeat containing 75B	4601
19274	-1	19274	Ptprm	protein tyrosine phosphatase, receptor type, M	8560
192786	-1	192786	Rapgef6	Rap guanine nucleotide exchange factor (GEF) 6	13235
19280	1	19280	Ptprs	protein tyrosine phosphatase, receptor type, S	8490
19294	1	19294	Nectin2	nectin cell adhesion molecule 2	3444
192976	1	192976	Lrrc75a	leucine rich repeat containing 75A	2051
19299	1	19299	Abcd3	ATP-binding cassette, sub-family D (ALD), member 3	3399
19301	1	19301	Pxmp2	peroxisomal membrane protein 2	1019
19303	-1	19303	Pxn	paxillin	6701
193043	-1	193043	Zfp3	zinc finger protein 3	1823
19309	-1	19309	Pygm	muscle glycogen phosphorylase	2844
19326	-1	19326	Rab11b	RAB11B, member RAS oncogene family	6065
19337	1	19337	Rab33a	RAB33A, member RAS oncogene family	1166
19338	-1	19338	Rab33b	RAB33B, member RAS oncogene family	3472
193385	-1	193385	Ripor2	RHO family interacting cell polarization regulator 2	7824
19339	-1	19339	Rab3a	RAB3A, member RAS oncogene family	1798
19340	-1	19340	Rab3d	RAB3D, member RAS oncogene family	3867
19341	-1	19341	Rab4a	RAB4A, member RAS oncogene family	1412
19342	-1	19342	Rab4b	RAB4B, member RAS oncogene family	1516
193452	1	193452	Zfp184	zinc finger protein 184 (Kruppel-like)	2734
19348	1	19348	Kif20a	kinesin family member 20A	3905
19352	1	19352	Rabggtb	Rab geranylgeranyl transferase, b subunit	2029
19354	-1	19354	Rac2	Rac family small GTPase 2	3036
19355	1	19355	Rad1	RAD1 checkpoint DNA exonuclease	7406
19359	1	19359	Rad23b	RAD23 homolog B, nucleotide excision repair protein	3811
19360	1	19360	Rad50	RAD50 double strand break repair protein	5610
19361	1	19361	Rad51	RAD51 recombinase	4120
19362	1	19362	Rad51ap1	RAD51 associated protein 1	3150
19363	1	19363	Rad51b	RAD51 paralog B	2837
19366	1	19366	Rad54l	RAD54 like (S. cerevisiae)	4894
193740	-1	193740	Hspa1a	heat shock protein 1A	2798
193742	-1	193742	Abhd16a	abhydrolase domain containing 16A	1945
19376	1	19376	Rab34	RAB34, member RAS oncogene family	1806
193838	-1	193838	Eme2	essential meiotic structure-specific endonuclease subunit 2	5365
19384	1	19384	Ran	RAN, member RAS oncogene family	2379
19385	1	19385	Ranbp1	RAN binding protein 1	852
19387	1	19387	Rangap1	RAN GTPase activating protein 1	4164
19395	-1	19395	Rasgrp2	RAS, guanyl releasing protein 2	3025
19400	1	19400	Rapsn	receptor-associated protein of the synapse	1620
19401	-1	19401	Rara	retinoic acid receptor, alpha	4339
19411	-1	19411	Rarg	retinoic acid receptor, gamma	3399
194126	1	194126	Mtmr11	myotubularin related protein 11	2812
19414	-1	19414	Rasa3	RAS p21 protein activator 3	4300
19415	-1	19415	Rasal1	RAS protein activator like 1 (GAP1 like)	3363
19418	-1	19418	Rasgrf2	RAS protein-specific guanine nucleotide-releasing factor 2	6892
19419	-1	19419	Rasgrp1	RAS guanyl releasing protein 1	5474
194237	-1	194237	Rimkla	ribosomal modification protein rimK-like family member A	4065
19428	1	19428	Rasl2-9	RAS-like, family 2, locus 9	1009
194388	-1	194388	Tet3	tet methylcytosine dioxygenase 3	11920
194401	-1	194401	Mical3	microtubule associated monooxygenase, calponin and LIM domain containing 3	18920
194655	-1	194655	Klf11	Kruppel-like factor 11	3982
195018	-1	195018	Zzef1	zinc finger, ZZ-type with EF hand domain 1	12385
19649	1	19649	Robo3	roundabout guidance receptor 3	5451
19651	-1	19651	Rbl2	RB transcriptional corepressor like 2	5304
19656	1	19656	Rbmxl1	RNA binding motif protein, X-linked like-1	1725
19663	-1	19663	Rbpms	RNA binding protein gene with multiple splicing	2812
19664	1	19664	Rbpj	recombination signal binding protein for immunoglobulin kappa J region	5981
19679	-1	19679	Pitpnm2	phosphatidylinositol transfer protein, membrane-associated 2	8555
19682	-1	19682	Rdh5	retinol dehydrogenase 5	1844
19687	1	19687	Rfc1	replication factor C (activator 1) 1	5899
19696	1	19696	Rel	reticuloendotheliosis oncogene	2584
19714	-1	19714	Rev3l	REV3 like, DNA directed polymerase zeta catalytic subunit	12613
19716	1	19716	Bex1	brain expressed X-linked 1	866
19718	1	19718	Rfc2	replication factor C (activator 1) 2	1518
19724	-1	19724	Rfx1	regulatory factor X, 1 (influences HLA class II expression)	6393
19725	-1	19725	Rfx2	regulatory factor X, 2 (influences HLA class II expression)	6922
19726	-1	19726	Rfx3	regulatory factor X, 3 (influences HLA class II expression)	10826
19727	-1	19727	Rfxank	regulatory factor X-associated ankyrin-containing protein	3682
19729	-1	19729	Slc50a1	solute carrier family 50 (sugar transporter), member 1	1022
19731	-1	19731	Rgl1	ral guanine nucleotide dissociation stimulator,-like 1	3887
19732	-1	19732	Rgl2	ral guanine nucleotide dissociation stimulator-like 2	2940
19734	1	19734	Rgs16	regulator of G-protein signaling 16	2335
19735	-1	19735	Rgs2	regulator of G-protein signaling 2	3009
19739	1	19739	Rgs9	regulator of G-protein signaling 9	12949
19752	-1	19752	Rnase1	ribonuclease, RNase A family, 1 (pancreatic)	970
19826	1	19826	Rnps1	ribonucleic acid binding protein S1	1922
19891	1	19891	Rpa2	replication protein A2	2116
20016	1	20016	Polr1c	polymerase (RNA) I polypeptide C	1305
20017	1	20017	Polr1b	polymerase (RNA) I polypeptide B	3998
20021	1	20021	Polr2c	polymerase (RNA) II (DNA directed) polypeptide C	1578
20022	1	20022	Polr2j	polymerase (RNA) II (DNA directed) polypeptide J	586
20024	1	20024	Sub1	SUB1 homolog, transcriptional regulator	3321
20112	-1	20112	Rps6ka2	ribosomal protein S6 kinase, polypeptide 2	6740
20133	1	20133	Rrm1	ribonucleotide reductase M1	3997
20135	1	20135	Rrm2	ribonucleotide reductase M2	2180
20166	1	20166	Rtkn	rhotekin	3358
20167	1	20167	Rtn2	reticulon 2 (Z-band associated protein)	4717
20168	1	20168	Rtn3	reticulon 3	5038
20174	1	20174	Ruvbl2	RuvB-like protein 2	1675
20184	-1	20184	Uimc1	ubiquitin interaction motif containing 1	4360
20185	-1	20185	Ncor1	nuclear receptor co-repressor 1	11692
20187	1	20187	Ryk	receptor-like tyrosine kinase	3267
20191	-1	20191	Ryr2	ryanodine receptor 2, cardiac	18197
20192	-1	20192	Ryr3	ryanodine receptor 3	16779
20198	-1	20198	S100a4	S100 calcium binding protein A4	499
20200	-1	20200	S100a6	S100 calcium binding protein A6 (calcyclin)	719
20201	-1	20201	S100a8	S100 calcium binding protein A8 (calgranulin A)	392
20202	-1	20202	S100a9	S100 calcium binding protein A9 (calgranulin B)	524
20215	-1	20215	Sag	S-antigen, retina and pineal gland (arrestin)	5854
20226	1	20226	Sars	seryl-aminoacyl-tRNA synthetase	5193
20230	-1	20230	Satb1	special AT-rich sequence binding protein 1	6788
20238	1	20238	Atxn1	ataxin 1	10607
20249	1	20249	Scd1	stearoyl-Coenzyme A desaturase 1	4837
20250	1	20250	Scd2	stearoyl-Coenzyme A desaturase 2	5451
20259	1	20259	Scin	scinderin	2997
20280	-1	20280	Scp2	sterol carrier protein 2, liver	2664
20290	1	20290	Ccl1	chemokine (C-C motif) ligand 1	505
20297	1	20297	Ccl20	chemokine (C-C motif) ligand 20	1421
20299	1	20299	Ccl22	chemokine (C-C motif) ligand 22	1811
20302	1	20302	Ccl3	chemokine (C-C motif) ligand 3	790
20303	1	20303	Ccl4	chemokine (C-C motif) ligand 4	660
20305	-1	20305	Ccl6	chemokine (C-C motif) ligand 6	1436
20310	-1	20310	Cxcl2	chemokine (C-X-C motif) ligand 2	1831
20315	-1	20315	Cxcl12	chemokine (C-X-C motif) ligand 12	7161
20317	1	20317	Serpinf1	serine (or cysteine) peptidase inhibitor, clade F, member 1	1599
20318	1	20318	Sdf4	stromal cell derived factor 4	5705
20335	1	20335	Sec61g	SEC61, gamma subunit	779
20339	1	20339	Sele	selectin, endothelial cell	2912
20341	1	20341	Selenbp1	selenium binding protein 1	1685
20343	-1	20343	Sell	selectin, lymphocyte	2421
20344	1	20344	Selp	selectin, platelet	3628
20345	-1	20345	Selplg	selectin, platelet (p-selectin) ligand	2604
20351	-1	20351	Sema4a	sema domain, immunoglobulin domain (Ig), transmembrane domain (TM) and short cytoplasmic domain, (semaphorin) 4A	3524
20352	-1	20352	Sema4b	sema domain, immunoglobulin domain (Ig), transmembrane domain (TM) and short cytoplasmic domain, (semaphorin) 4B	5642
20353	1	20353	Sema4c	sema domain, immunoglobulin domain (Ig), transmembrane domain (TM) and short cytoplasmic domain, (semaphorin) 4C	4292
20354	-1	20354	Sema4d	sema domain, immunoglobulin domain (Ig), transmembrane domain (TM) and short cytoplasmic domain, (semaphorin) 4D	4691
20355	-1	20355	Sema4f	sema domain, immunoglobulin domain (Ig), TM domain, and short cytoplasmic domain	5014
20359	1	20359	Sema6b	sema domain, transmembrane domain (TM), and cytoplasmic domain, (semaphorin) 6B	3977
20361	1	20361	Sema7a	sema domain, immunoglobulin domain (Ig), and GPI membrane anchor, (semaphorin) 7A	3275
20362	1	20362	2008-09-01	septin 8	4627
20363	-1	20363	Selenop	selenoprotein P	2216
20365	1	20365	Serf1	small EDRK-rich factor 1	851
20371	-1	20371	Foxp3	forkhead box P3	3928
20375	-1	20375	Spi1	spleen focus forming virus (SFFV) proviral integration oncogene	1333
20377	1	20377	Sfrp1	secreted frizzled-related protein 1	4372
20384	-1	20384	Srsf5	serine/arginine-rich splicing factor 5	1784
20393	-1	20393	Sgk1	serum/glucocorticoid regulated kinase 1	4565
20394	-1	20394	Scg5	secretogranin V	1227
20399	-1	20399	Sh2b1	SH2B adaptor protein 1	3643
20401	-1	20401	Sh3bp1	SH3-domain binding protein 1	2578
20403	-1	20403	Itsn2	intersectin 2	9769
20405	-1	20405	Sh3gl1	SH3-domain GRB2-like 1	2075
20408	1	20408	Sh3gl3	SH3-domain GRB2-like 3	1575
20410	-1	20410	Sorbs3	sorbin and SH3 domain containing 3	3727
20419	1	20419	Shcbp1	Shc SH2-domain binding protein 1	2132
20422	1	20422	Sem1	SEM1, 26S proteasome complex subunit	491
20425	1	20425	Shmt1	serine hydroxymethyltransferase 1 (soluble)	2345
20430	1	20430	Cyfip1	cytoplasmic FMR1 interacting protein 1	10150
20431	1	20431	Pmel	premelanosome protein	2130
20437	-1	20437	Siah1a	siah E3 ubiquitin protein ligase 1A	2109
20438	1	20438	Siah1b	siah E3 ubiquitin protein ligase 1B	1713
20440	-1	20440	St6gal1	beta galactoside alpha 2,6 sialyltransferase 1	4836
20442	-1	20442	St3gal1	ST3 beta-galactoside alpha-2,3-sialyltransferase 1	5849
20443	1	20443	St3gal4	ST3 beta-galactoside alpha-2,3-sialyltransferase 4	2029
20447	-1	20447	St6galnac3	ST6 (alpha-N-acetyl-neuraminyl-2,3-beta-galactosyl-1,3)-N-acetylgalactosaminide alpha-2,6-sialyltransferase 3	3885
20448	1	20448	St6galnac4	ST6 (alpha-N-acetyl-neuraminyl-2,3-beta-galactosyl-1,3)-N-acetylgalactosaminide alpha-2,6-sialyltransferase 4	6497
20449	-1	20449	St8sia1	ST8 alpha-N-acetyl-neuraminide alpha-2,8-sialyltransferase 1	8995
20452	-1	20452	St8sia4	ST8 alpha-N-acetyl-neuraminide alpha-2,8-sialyltransferase 4	8227
20454	1	20454	St3gal5	ST3 beta-galactoside alpha-2,3-sialyltransferase 5	2453
20460	1	20460	Stil	Scl/Tal1 interrupting locus	5445
20463	-1	20463	Cox7a2l	cytochrome c oxidase subunit 7A2 like	1149
20469	-1	20469	Sipa1	signal-induced proliferation associated gene 1	4312
20471	1	20471	Six1	sine oculis-related homeobox 1	2849
20475	1	20475	Six5	sine oculis-related homeobox 5	2853
20480	1	20480	Clpb	ClpB caseinolytic peptidase B	9313
20481	-1	20481	Ski	ski sarcoma viral oncogene homolog (avian)	5465
20482	-1	20482	Skil	SKI-like	10040
20492	1	20492	Slbp	stem-loop binding protein	2130
20496	1	20496	Slc12a2	solute carrier family 12, member 2	6520
20498	1	20498	Slc12a4	solute carrier family 12, member 4	3832
20499	-1	20499	Slc12a7	solute carrier family 12, member 7	7313
20501	1	20501	Slc16a1	solute carrier family 16 (monocarboxylic acid transporters), member 1	4430
20509	1	20509	Slc19a1	solute carrier family 19 (folate transporter), member 1	3992
20510	1	20510	Slc1a1	solute carrier family 1 (neuronal/epithelial high affinity glutamate transporter, system Xag), member 1	5882
20511	1	20511	Slc1a2	solute carrier family 1 (glial high affinity glutamate transporter), member 2	12068
20515	-1	20515	Slc20a1	solute carrier family 20, member 1	5188
20524	1	20524	Slc25a17	solute carrier family 25 (mitochondrial carrier, peroxisomal membrane protein), member 17	1667
20525	1	20525	Slc2a1	solute carrier family 2 (facilitated glucose transporter), member 1	2572
20527	1	20527	Slc2a3	solute carrier family 2 (facilitated glucose transporter), member 3	6493
20529	1	20529	Slc31a1	solute carrier family 31, member 1	4306
20532	-1	20532	Slc3a1	solute carrier family 3, member 1	2305
20533	-1	20533	Slc4a1	solute carrier family 4 (anion exchanger), member 1	4550
20539	1	20539	Slc7a5	solute carrier family 7 (cationic amino acid transporter, y+ system), member 5	3558
20541	-1	20541	Slc8a1	solute carrier family 8 (sodium/calcium exchanger), member 1	20177
20557	1	20557	Slfn3	schlafen 3	1983
20568	-1	20568	Slpi	secretory leukocyte peptidase inhibitor	1026
20588	1	20588	Smarcc1	SWI/SNF related, matrix associated, actin dependent regulator of chromatin, subfamily c, member 1	6659
20592	-1	20592	Kdm5d	lysine (K)-specific demethylase 5D	7600
20595	1	20595	Smn1	survival motor neuron 1	1634
20598	-1	20598	Smpd2	sphingomyelin phosphodiesterase 2, neutral	2851
20599	-1	20599	Smr3a	submaxillary gland androgen regulated protein 3A	663
20602	-1	20602	Ncor2	nuclear receptor co-repressor 2	9781
20603	1	20603	Sms	spermine synthase	5589
20612	-1	20612	Siglec1	sialic acid binding Ig-like lectin 1, sialoadhesin	7143
20620	1	20620	Plk2	polo like kinase 2	3378
20621	-1	20621	Snn	stannin	3000
20623	-1	20623	Snrk	SNF related kinase	5058
20624	1	20624	Eftud2	elongation factor Tu GTP binding domain containing 2	6038
20630	1	20630	Snrpc	U1 small nuclear ribonucleoprotein C	760
20639	1	20639	Snrpb2	U2 small nuclear ribonucleoprotein B	1230
20641	1	20641	Snrpd1	small nuclear ribonucleoprotein D1	837
20643	1	20643	Snrpe	small nuclear ribonucleoprotein E	492
20649	-1	20649	Sntb1	syntrophin, basic 1	2153
20650	-1	20650	Sntb2	syntrophin, basic 2	4423
20658	-1	20658	Son	Son DNA binding protein	12822
20660	-1	20660	Sorl1	sortilin-related receptor, LDLR class A repeats-containing	6938
20662	-1	20662	Sos1	SOS Ras/Rac guanine nucleotide exchange factor 1	10593
20667	1	20667	Sox12	SRY (sex determining region Y)-box 12	4435
20677	-1	20677	Sox4	SRY (sex determining region Y)-box 4	2953
20684	-1	20684	Sp100	nuclear antigen Sp100	3187
20688	-1	20688	Sp4	trans-acting transcription factor 4	9017
20692	-1	20692	Sparc	secreted acidic cysteine rich glycoprotein	2641
20708	1	20708	Serpinb6b	serine (or cysteine) peptidase inhibitor, clade B, member 6b	1866
20713	-1	20713	Serpini1	serine (or cysteine) peptidase inhibitor, clade I, member 1	5756
20715	1	20715	Serpina3g	serine (or cysteine) peptidase inhibitor, clade A, member 3G	2097
207165	-1	207165	Bptf	bromodomain PHD finger transcription factor	12788
207175	1	207175	Cetn4	centrin 4	1059
207181	-1	207181	Rbms3	RNA binding motif, single stranded interacting protein	10390
207182	1	207182	Ggt7	gamma-glutamyltransferase 7	2929
20720	1	20720	Serpine2	serine (or cysteine) peptidase inhibitor, clade E, member 2	3675
207212	1	207212	Arhgef17	Rho guanine nucleotide exchange factor (GEF) 17	10498
207214	1	207214	Larp4	La ribonucleoprotein domain family, member 4	7413
20723	1	20723	Serpinb9	serine (or cysteine) peptidase inhibitor, clade B, member 9	3397
207278	-1	207278	Fchsd2	FCH and double SH3 domains 2	6344
20728	-1	20728	Spic	Spi-C transcription factor (Spi-1/PU.1 related)	1358
20732	1	20732	Spint1	serine protease inhibitor, Kunitz type 1	2344
20739	-1	20739	Spta1	spectrin alpha, erythrocytic 1	8405
20742	-1	20742	Sptbn1	spectrin beta, non-erythrocytic 1	11019
207474	-1	207474	Kctd12b	potassium channel tetramerisation domain containing 12b	4795
20750	1	20750	Spp1	secreted phosphoprotein 1	1658
207521	-1	207521	Dtx4	deltex 4, E3 ubiquitin ligase	5812
207592	-1	207592	Tbc1d16	TBC1 domain family, member 16	6988
207607	1	207607	Ccdc40	coiled-coil domain containing 40	5190
207615	-1	207615	Wdr37	WD repeat domain 37	8099
20768	1	20768	Sephs2	selenophosphate synthetase 2	2181
207728	-1	207728	Pde2a	phosphodiesterase 2A, cGMP-stimulated	4788
207742	-1	207742	Rnf43	ring finger protein 43	6367
20775	1	20775	Sqle	squalene epoxidase	2748
20776	-1	20776	Tmie	transmembrane inner ear	2509
207777	-1	207777	Tspoap1	TSPO associated protein 1	8583
20778	1	20778	Scarb1	scavenger receptor class B, member 1	3100
207781	-1	207781	C2cd2	C2 calcium-dependent domain containing 2	7147
207785	-1	207785	Csrnp2	cysteine-serine-rich nuclear protein 2	4126
207798	-1	207798	Gramd1c	GRAM domain containing 1C	3625
207839	-1	207839	Galnt6	polypeptide N-acetylgalactosaminyltransferase 6	5769
207965	1	207965	Vcpkmt	valosin containing protein lysine (K) methyltransferase	1027
208043	-1	208043	Setd1b	SET domain containing 1B	12069
208084	1	208084	Pif1	PIF1 5'-to-3' DNA helicase	3725
20810	1	20810	Srm	spermidine synthase	1328
208104	-1	208104	Mlxip	MLX interacting protein	8201
20811	-1	20811	Srms	src-related kinase lacking C-terminal regulatory tyrosine and N-terminal myristylation sites	2547
20817	-1	20817	Srpk2	serine/arginine-rich protein specific kinase 2	8370
208198	-1	208198	Btbd2	BTB (POZ) domain containing 2	3103
20826	1	20826	Snu13	SNU13 homolog, small nuclear ribonucleoprotein (U4/U6.U5)	1257
208292	-1	208292	Zfp871	zinc finger protein 871	10850
20833	1	20833	Ssrp1	structure specific recognition protein 1	2956
208449	-1	208449	Sgms1	sphingomyelin synthase 1	6173
20845	-1	20845	Star	steroidogenic acute regulatory protein	4007
20849	1	20849	Stat4	signal transducer and activator of transcription 4	3647
20850	1	20850	Stat5a	signal transducer and activator of transcription 5A	6444
208518	1	208518	Cep78	centrosomal protein 78	3103
20855	1	20855	Stc1	stanniocalcin 1	3743
20856	1	20856	Stc2	stanniocalcin 2	3028
208628	1	208628	Kntc1	kinetochore associated 1	6961
20863	1	20863	Stfa3	stefin A3	412
208647	1	208647	Creb3l2	cAMP responsive element binding protein 3-like 2	3318
20866	-1	20866	Stim1	stromal interaction molecule 1	5164
20867	1	20867	Stip1	stress-induced phosphoprotein 1	2781
20868	-1	20868	Stk10	serine/threonine kinase 10	5201
208715	1	208715	Hmgcs1	3-hydroxy-3-methylglutaryl-Coenzyme A synthase 1	4523
208727	-1	208727	Hdac4	histone deacetylase 4	4284
20873	1	20873	Plk4	polo like kinase 4	5518
20877	1	20877	Aurkb	aurora kinase B	1957
20878	1	20878	Aurka	aurora kinase A	1975
208795	-1	208795	Tmem63a	transmembrane protein 63a	3254
208836	1	208836	Fanci	Fanconi anemia, complementation group I	5250
208846	-1	208846	Daam1	dishevelled associated activator of morphogenesis 1	7291
208869	1	208869	Dock3	dedicator of cyto-kinesis 3	10749
208908	-1	208908	Ccdc62	coiled-coil domain containing 62	3920
20892	1	20892	Cenpx	centromere protein X	996
20893	1	20893	Bhlhe40	basic helix-loop-helix family, member e40	3113
208943	-1	208943	Myo5c	myosin VC	8214
20897	1	20897	Stra6	stimulated by retinoic acid gene 6	5030
209003	1	209003	Rbmx2	RNA binding motif protein, X-linked 2	1743
20901	1	20901	Strap	serine/threonine kinase receptor associated protein	2644
209011	-1	209011	Sirt7	sirtuin 7	2925
209027	1	209027	Pycr1	pyrroline-5-carboxylate reductase 1	3704
20907	-1	20907	Stx1a	syntaxin 1A (brain)	2154
209086	-1	209086	Samd9l	sterile alpha motif domain containing 9-like	5328
20910	1	20910	Stxbp1	syntaxin binding protein 1	4005
209131	-1	209131	Snx30	sorting nexin family member 30	7507
209225	-1	209225	Zfp710	zinc finger protein 710	5045
209334	1	209334	Gen1	GEN1, Holliday junction 5' flap endonuclease	3283
209354	1	209354	Eif2b1	eukaryotic translation initiation factor 2B, subunit 1 (alpha)	1938
20937	1	20937	Suv39h1	suppressor of variegation 3-9 1	3473
209380	-1	209380	Gm4759	GTPase, very large interferon inducible 1 pseudogene	3091
209387	1	209387	Trim30d	tripartite motif-containing 30D	3758
209456	-1	209456	Trp53bp2	transformation related protein 53 binding protein 2	4427
20963	-1	20963	Syk	spleen tyrosine kinase	8006
209683	-1	209683	Ttc28	tetratricopeptide repeat domain 28	10687
20969	1	20969	Sdc1	syndecan 1	3056
209707	-1	209707	Lcorl	ligand dependent nuclear receptor corepressor-like	9991
20971	1	20971	Sdc4	syndecan 4	2460
20972	1	20972	Syngr1	synaptogyrin 1	4465
20973	1	20973	Syngr2	synaptogyrin 2	1524
209737	1	209737	Kif15	kinesin family member 15	7763
20974	1	20974	Syngr3	synaptogyrin 3	1959
210004	-1	210004	B3gntl1	UDP-GlcNAc:betaGal beta-1,3-N-acetylglucosaminyltransferase-like 1	3390
210029	1	210029	Metrnl	meteorin, glial cell differentiation regulator-like	2468
210035	1	210035	Nemp1	nuclear envelope integral membrane protein 1	7165
210104	-1	210104	Zfp658	zinc finger protein 658	3381
210126	-1	210126	Lpp	LIM domain containing preferred translocation partner in lipoma	22343
210172	-1	210172	Zfp526	zinc finger protein 526	3352
210293	-1	210293	Dock10	dedicator of cytokinesis 10	12450
210503	-1	210503	Zfp677	zinc finger protein 677	2917
210544	1	210544	Tbc1d31	TBC1 domain family, member 31	6126
210710	-1	210710	Gab3	growth factor receptor bound protein 2-associated protein 3	2129
210757	-1	210757	Themis	thymocyte selection associated	8483
210808	1	210808	Lacc1	laccase domain containing 1	3265
210853	1	210853	Zfp947	zinc finger protein 947	2659
210973	-1	210973	Kbtbd2	kelch repeat and BTB (POZ) domain containing 2	3942
210982	-1	210982	Bicral	BRD4 interacting chromatin remodeling complex associated protein like	6638
211134	-1	211134	Lzts1	leucine zipper, putative tumor suppressor 1	1800
[truncated: 3,660 more rows]
